# Supplementary material for: An Adult Developmental Approach to Perceived Facial Attractiveness and Distinctiveness
Source: Front Psychol. 2018 May 7;9:561. doi: 10.3389/fpsyg.2018.00561 (PMC5949528; doi:10.3389/fpsyg.2018.00561)
Supplement: DATA SHEET 1 — Perceived facial attractiveness. [file Data_Sheet_1.XLSX]

## Sheet: attr_neutral
Picture	Set	Face Age	Face Gender	Mean_YM_attr	SD_YM_attr	Mean_YF_attr	SD_YF_attr	Mean_MM_attr	SD_MM_attr	Mean_MF_attr	SD_MF_attr	Mean_OM_attr	SD_OM_attr	Mean_OF_attr	SD_OF_attr
008_y_m_n_a.jpg	a	young	Male	30.5833	17.4848	39.6	23.4625	45.5	19.7599	49.1111	19.7196	60.9091	19.0182	67.2727	28.4116
008_y_m_n_b.jpg	b	young	Male	38.5833	25.9211	29.1111	33.1868	53.75	13.8507	52.4545	24.151	72.2	12.4437	58	19.5917
013_y_m_n_a.jpg	a	young	Male	31.5	20.0522	42.0909	25.5439	53.5833	17.0478	52.4444	24.835	56.4	22.6284	60.4167	28.9371
013_y_m_n_b.jpg	b	young	Male	32.25	24.324	33.3	26.7625	48.5455	12.652	48.1818	24.7985	61.5455	17.1835	43.0833	18.3574
016_y_m_n_a.jpg	a	young	Male	22.0909	22.8318	52.4167	24.5522	52.7273	22.3521	50.7	23.6176	57.7	20.4779	56.75	23.0971
016_y_m_n_b.jpg	b	young	Male	35.6667	25.9452	37.2	27.304	53.5455	11.8268	51.0833	17.6247	62.0909	18.0635	50.1667	20.3284
025_y_m_n_a.jpg	a	young	Male	23.3	21.9193	30.6667	18.6076	44	22.7876	48.3333	22.3719	60.6667	18.5	62.75	23.1561
025_y_m_n_b.jpg	b	young	Male	31.4167	25.134	29.3	24.8464	45.75	16.0404	52.8	26.343	64.7	28.7713	53.1667	16.5959
031_y_m_n_a.jpg	a	young	Male	39.9091	28.0266	57.2727	22.6852	62.9167	23.7466	59.7778	28.3274	62	22.561	72.8	30.8646
031_y_m_n_b.jpg	b	young	Male	41.1667	24.6238	48.1111	32.107	61.1818	17.854	57.8182	20.1436	71.4545	13.7504	63.2727	22.7072
037_y_m_n_a.jpg	a	young	Male	22.9091	18.9813	45.5455	21.9789	52.3636	27.8865	50.2	26.7656	60.3333	27.3496	49.6667	22.2111
037_y_m_n_b.jpg	b	young	Male	33.3636	19.9914	27.2727	24.7471	47.7273	16.6799	40.2727	22.6278	51.9	14.3484	41.9231	27.2656
041_y_m_n_a.jpg	a	young	Male	24.8889	15.3252	51.5385	20.763	53.5455	16.9314	68.6364	17.8845	61	19.2094	60.4545	24.7684
041_y_m_n_b.jpg	b	young	Male	40.5833	24.7256	42.5556	31.4488	64.2727	18.7781	49.0909	21.0069	69.6364	17.6197	54.5455	15.6228
049_y_m_n_a.jpg	a	young	Male	21.8182	22.0718	42.9	29.3388	45.9091	26.8047	39.9091	18.2782	57	24.1937	39.7273	22.5703
049_y_m_n_b.jpg	b	young	Male	30.4167	24.3738	36.9	23.8162	55.1818	21.042	53.4	16.8865	52.4545	18.8168	35.5	21.8153
057_y_m_n_a.jpg	a	young	Male	22.3	18.6491	46.75	24.8674	48.9091	19.2429	56.2	19.0601	50.4	21.4124	66.0909	27.035
057_y_m_n_b.jpg	b	young	Male	37	25.8302	46.8	20.9274	57.0833	10.5784	52.6364	23.8213	55	19.985	58	21.4515
062_y_m_n_a.jpg	a	young	Male	31.7273	28.0788	52.1818	31.8177	48.3333	24.2462	48.1	25.8003	55.2	24.5438	56	26.5535
062_y_m_n_b.jpg	b	young	Male	38.2727	20.8379	37.9	23.1634	54.5455	17.4663	49	24.5221	64.6364	11.4654	49.25	22.5394
066_y_m_n_a.jpg	a	young	Male	31	24.9844	51.5833	22.472	50.0909	17.2479	57	18.6369	59.3636	28.9319	65.4	26.4163
066_y_m_n_b.jpg	b	young	Male	34.4167	23.4383	39.125	29.1569	60.5	13.7538	56.1818	21.0562	64.9167	16.2058	50.5455	21.1819
072_y_m_n_a.jpg	a	young	Male	30.0833	21.8443	57.6667	23.6118	46.1818	19.1145	58.4444	19.654	63.3	18.4394	66.8182	22.0718
072_y_m_n_b.jpg	b	young	Male	46.5833	19.6166	51.9	25.7183	64.3636	12.5799	56	28.5727	68.6667	14.9261	58.3636	26.5604
081_y_m_n_a.jpg	a	young	Male	21.3333	16.0982	52.9	24.9419	35.8182	19.5797	33.7	14.0479	50	26.0981	35.4167	25.9456
081_y_m_n_b.jpg	b	young	Male	32.1667	21.8084	46.5	19.1674	45.6364	18.2224	36.4545	23.8888	52.9167	22.277	29.0909	20.3787
089_y_m_n_a.jpg	a	young	Male	37.4167	24.1377	59.5455	27.1085	59.5833	18.093	61.1111	22.3632	56.5	23.4438	58.7273	27.0114
089_y_m_n_b.jpg	b	young	Male	37.9091	21.5335	47.9091	25.54	68.1667	17.5387	59.3636	28.4896	59.5	11.9126	46.4545	27.4822
099_y_m_n_a.jpg	a	young	Male	31.1818	22.1035	44.4167	24.9015	47.3333	24.4998	54.4444	17.2055	54.4545	23.6701	50.3636	30.5917
099_y_m_n_b.jpg	b	young	Male	30.6667	22.1003	38.1111	24.4767	48.8182	15.4584	42.3636	27.4127	51.7	22.0255	45.5	17.3494
105_y_m_n_a.jpg	a	young	Male	27.3636	23.8507	38.6667	24.0731	47	23.3538	42	19.9833	54.6	22.8969	47.3333	20.2993
105_y_m_n_b.jpg	b	young	Male	33.9167	20.7034	37.9	26.7559	36.8182	20.7404	37.2727	21.5921	49.6	23.5429	39.25	21.4015
109_y_m_n_a.jpg	a	young	Male	24.3077	19.0979	41.9091	20.4424	49.9091	20.2359	42.5	20.2169	62.8	22.1751	58.2727	27.317
109_y_m_n_b.jpg	b	young	Male	37.4167	18.8364	30.3	31.637	52.4545	19.0912	45.7273	24.4012	61.6	18.8927	54.0833	24.426
114_y_m_n_a.jpg	a	young	Male	16.7	11.8608	33.1538	23.8497	45.5455	17.1077	43.4	19.6537	57.4	26.7507	60.0909	24.9337
114_y_m_n_b.jpg	b	young	Male	32.2727	23.5163	37.9091	24.8815	52.6364	20.9536	44.3636	26.4812	57.2727	19.87	56.8333	22.5986
119_y_m_n_a.jpg	a	young	Male	37.3333	20.606	52.8	29.5815	56.5455	14.5283	58	20.838	57.7	17.7141	58.25	28.5916
119_y_m_n_b.jpg	b	young	Male	41.1	28.4974	49	29.6985	57.5455	15.9145	58.9091	18.9074	69.2727	15.7041	58.8333	22.5825
123_y_m_n_a.jpg	a	young	Male	24.1667	17.6575	44.7	19.7768	44	14.7851	53.2	21.6785	57.5556	24.6531	59.6667	26.1511
123_y_m_n_b.jpg	b	young	Male	43.9167	25.1774	43.1	33.1108	42.7273	14.409	45.0833	21.8817	62.2	16.1024	53.9231	21.7388
127_y_m_n_a.jpg	a	young	Male	39.4167	20.3892	59.1667	28.1613	57.5	19.2283	63.8889	26.4454	57.1818	20.6243	57.8182	23.3016
127_y_m_n_b.jpg	b	young	Male	50.9167	24.2317	50.9	30.0165	63.7273	21.1806	60.0909	25.801	63.2727	15.9693	54	23.8213
135_y_m_n_a.jpg	a	young	Male	22.5455	18.7796	19.3636	17.7723	45.1818	23.1984	42.7	19.2703	54.3	24.8554	35.4167	20.456
135_y_m_n_b.jpg	b	young	Male	26.0909	25.1335	21.2727	19.8196	44.1818	17.4975	35.0909	23.7801	57.6364	13.9805	37.0909	19.8164
144_y_m_n_a.jpg	a	young	Male	39.75	23.818	66.8	25.3237	58.7273	23.1737	61	20.672	65.9	14.7456	71.5833	25.2783
144_y_m_n_b.jpg	b	young	Male	50.2727	21.9002	57.8	27.8839	66.1667	15.9421	63.9	17.3426	69.1	14.0036	59	20.0749
147_y_m_n_a.jpg	a	young	Male	25.2727	18.7034	61.8182	23.4001	53.8182	22.4358	55.3	19.9335	58.6667	15.0414	68.9	30.0128
147_y_m_n_b.jpg	b	young	Male	39.4167	24.1151	50	34.9921	42.8182	15.1448	51.9091	26.7262	58.3636	23.1226	51.25	23.2149
153_y_m_n_a.jpg	a	young	Male	32.5455	19.9317	50.75	24.7023	47.6364	15.635	51	17.7576	51.5	22.8242	55.5455	21.4819
153_y_m_n_b.jpg	b	young	Male	39.5455	22.1692	41.7	20.7581	55	19.2543	47.4	24.1808	53.9	25.022	36.75	21.7679
160_y_m_n_a.jpg	a	young	Male	28.4167	24.0811	39.0909	27.2377	48.5455	11.0305	64.0909	25.6572	62.5	16.2224	66.0909	18.8704
160_y_m_n_b.jpg	b	young	Male	30.6667	22.2479	26	20.9974	56	17.9038	54.9	21.3044	60.7	23.2859	54.0833	19.4444
167_y_m_n_a.jpg	a	young	Male	32	14.8508	41.3	26.4325	49.5	19.0764	45.7778	27.7929	52.3333	23.2002	56.9167	29.0343
167_y_m_n_b.jpg	b	young	Male	31.3636	27.9867	32.6364	28.0045	48.75	17.2475	45.1	22.1181	57.0909	18.1684	42	25.1794
170_y_m_n_a.jpg	a	young	Male	29.5455	21.5516	52.9091	28.2647	43.6364	20.0812	47.7	19.4254	57.3636	23.6105	52	28.5272
170_y_m_n_b.jpg	b	young	Male	33.6364	22.0829	37.2	28.7162	54.0833	18.9471	49.1	27.0286	51.7	23.9585	38.4167	24.4036
175_y_m_n_a.jpg	a	young	Male	32.0833	22.869	65.3	28.1427	50.2727	21.2513	61.1	22.2084	52.9091	22.3717	59	24.2776
175_y_m_n_b.jpg	b	young	Male	48.1667	21.683	57.3	31.5033	54.9091	17.4955	56.4545	24.122	65.0909	11.2023	56.75	19.9733
010_y_f_n_a.jpg	a	young	Female	45.75	23.9929	59.6	23.8244	59.0909	17.4726	54.5	19.7104	62.8	25.8577	48.4545	25.2086
010_y_f_n_b.jpg	b	young	Female	44.3333	26.5923	51.2	27.9078	58.5455	26.7147	50.3636	24.8486	61.8182	14.6001	53.8333	23.6098
020_y_f_n_a.jpg	a	young	Female	77.6667	18.0873	65.9091	12.755	58.8333	25.1715	67.2	25.9264	66.6	20.3208	71.5455	21.8557
020_y_f_n_b.jpg	b	young	Female	65.9167	19.28	54.5	28.4224	59.1667	25.1173	55.1818	24.9833	72	11.6046	68.5833	17.4952
022_y_f_n_a.jpg	a	young	Female	48	27.0222	66.6667	11.2519	62	24.3557	57	25.2411	62	19.7294	63.6667	30.5951
022_y_f_n_b.jpg	b	young	Female	48.25	26.9482	33.1111	24.3025	58.6364	24.2869	50.2727	22.1905	62.4	20.4081	46.9231	26.9767
028_y_f_n_a.jpg	a	young	Female	50.9	25.7788	59.5833	21.1164	57.1667	16.0558	62	20.9178	73.7	17.3465	58.5	23.5237
028_y_f_n_b.jpg	b	young	Female	54	26.5932	41.8	24.4622	54.3333	25.7199	54.3636	16.9191	58.2	20.5902	62.75	25.5098
034_y_f_n_a.jpg	a	young	Female	23.6154	19.7296	32.3333	22.4027	36.25	25.5134	32	19.1181	53.8	25.1608	52	18.8096
034_y_f_n_b.jpg	b	young	Female	29.5	21.9193	36.5	20.4844	42.5455	22.5316	33.4	30.1264	44.6	23.5853	30.25	25.8145
040_y_f_n_a.jpg	a	young	Female	66.9091	23.6958	68.8333	18.379	70.3333	22.8327	64.5556	20.8633	60.6	19.1961	62.5455	24.6429
040_y_f_n_b.jpg	b	young	Female	75.8333	14.5654	54.3	33.4134	67.1818	20.2377	60	20.0952	67.7	22.5194	61.5833	26.342
048_y_f_n_a.jpg	a	young	Female	56.1538	24.5759	61.4	13.5335	59.3636	23.6824	61.2	16.7053	59.7	32.263	62.9167	28.0339
048_y_f_n_b.jpg	b	young	Female	50.1667	25.6651	56.2	30.1876	48.5833	23.9145	43.1	17.9595	57.9	22.3082	52.75	19.9414
054_y_f_n_a.jpg	a	young	Female	60.3333	26.5478	58.5455	19.065	51.4545	27.1712	57.8	22.9095	65.8	29.7463	59.5833	29.2744
054_y_f_n_b.jpg	b	young	Female	61.25	29.9549	57.8	28.0111	63.0909	27.1825	47.2727	26.522	60.1	18.0398	49.25	24.1101
063_y_f_n_a.jpg	a	young	Female	58.4	19.5061	57.25	22.7761	66.8333	28.5493	65.5	15.5438	63.8	19.2861	68.4545	24.0098
063_y_f_n_b.jpg	b	young	Female	47.4167	30.074	46.5556	28.5487	63	26.2145	54.9091	22.147	59.1	26.9008	59.5833	20.1966
069_y_f_n_a.jpg	a	young	Female	56.7	26.6127	67.25	15.5512	62.8333	21.875	72	18.0208	80.2	15.5192	76.6364	29.2413
069_y_f_n_b.jpg	b	young	Female	65.4167	24.744	62.2222	31.5744	69.9091	19.7051	60.2727	25.2353	80.8182	13.6148	63	16.6406
071_y_f_n_a.jpg	a	young	Female	51.4615	24.3879	54.5	16.8077	63.8182	19.7829	43.3	20.0225	52.2	24.3073	55.5833	30.4227
071_y_f_n_b.jpg	b	young	Female	49.75	27.7362	50.6	30.2185	46.9167	20.527	50.6	20.9136	59.7	13.4002	41.5833	27.9527
085_y_f_n_a.jpg	a	young	Female	23.75	24.6471	46.5	26.5587	53.3	28.5036	51.7273	22.7028	56.1	23.1826	57.0909	23.39
085_y_f_n_b.jpg	b	young	Female	39.5833	28.0631	36.8	27.0834	51.1818	18.5463	46.9091	19.3982	59.9091	18.881	55.5	28.7892
090_y_f_n_a.jpg	a	young	Female	49.75	19.5361	58.1	13.5438	51	21.4895	47.6	21.9099	60.7	24.2856	55.5833	28.0599
090_y_f_n_b.jpg	b	young	Female	42.5	28.6055	41.9	23.8907	57.2727	23.0395	45.5455	13.5673	65.9	15.007	47	27.9675
098_y_f_n_a.jpg	a	young	Female	64.0909	18.8226	63.3636	22.0784	53.75	13.2124	60.2222	17.0937	64.2	22.305	62.1818	24.396
098_y_f_n_b.jpg	b	young	Female	56.3333	17.8648	65.3	34.2444	56.1818	22.829	48.4	24.2542	61.3636	16.4698	42.5	27.4905
101_y_f_n_a.jpg	a	young	Female	43.3636	15.9516	63.5833	19.0905	62.7273	14.1074	61.6	20.5707	54.2	26.7199	53.6364	23.9302
101_y_f_n_b.jpg	b	young	Female	55.5455	26.6622	49.8	20.8423	57.1667	26.4604	56.7	25.4779	61.6364	14.7056	42.25	25.9094
106_y_f_n_a.jpg	a	young	Female	64.8333	24.124	57.1667	26.243	62.4545	26.9606	55.4	21.1933	67.2	19.7473	70.5833	27.2979
106_y_f_n_b.jpg	b	young	Female	60.6667	25.7658	46.3	27.1991	56.2727	26.2568	53.7273	24.1747	66.5455	23.9515	57.5	24.4447
115_y_f_n_a.jpg	a	young	Female	78.4545	15.5844	78.3636	15.1015	73	18.9103	69.8	24.9301	73.4	18.9162	68.6667	25.003
115_y_f_n_b.jpg	b	young	Female	75.0909	17.6321	69.9	28.5441	62.8	19.159	61.9091	22.3314	76.8	13.3816	71.25	19.8363
125_y_f_n_a.jpg	a	young	Female	15.8182	17.9879	38.1667	15.637	43.0909	27.8799	47.7273	27.8786	52.3	21.6438	54.1818	26.3622
125_y_f_n_b.jpg	b	young	Female	32.5833	24.1791	32.9	22.5065	43.6364	24.5938	42.9091	27.8189	62	9.71825	47	24.768
132_y_f_n_a.jpg	a	young	Female	36.75	19.9323	54.5833	21.6898	51.5455	24.9334	52.4	20.5329	62.7778	21.9076	59	26.3473
132_y_f_n_b.jpg	b	young	Female	34.5	24.1002	39.8	20.8529	49.5833	20.6242	47.3636	17.7723	61.4545	25.2324	48.1667	23.7748
134_y_f_n_a.jpg	a	young	Female	47.8333	19.1303	57.9	22.9029	64.6	12.0941	66.3636	16.5244	65.2727	21.7214	59.7273	24.8559
134_y_f_n_b.jpg	b	young	Female	44.1667	27.9051	59.2	27.9396	59.0909	29.1803	50.75	21.1837	65	11.2573	54.4545	30.2766
140_y_f_n_a.jpg	a	young	Female	50.0769	22.0245	67.6364	21.9603	56.0909	22.452	51.9091	20.7435	63.1	21.5842	56.2727	26.1919
140_y_f_n_b.jpg	b	young	Female	50.1667	30.0389	54.9	28.2939	51.8333	22.2091	51.1	26.7683	60	12.9271	48.3333	26.4312
150_y_f_n_a.jpg	a	young	Female	53.75	13.8572	54.5455	17.7559	64	27.51	52.9091	17.598	66.9	23.704	68.4545	31.2197
150_y_f_n_b.jpg	b	young	Female	45.4545	27.1196	44.8	29.7837	55.6	17.7464	45.8333	16.6069	66.8	14.4438	48.3077	22.4217
152_y_f_n_a.jpg	a	young	Female	72	24.6171	77.2727	17.3556	64	15.5212	62	25.4067	75	16.8721	75.0833	22.1583
152_y_f_n_b.jpg	b	young	Female	68.8333	22.4371	56.6667	36.2319	67.1818	27.96	56.1	22.3331	73.4	12.9289	63.9167	24.3178
162_y_f_n_a.jpg	a	young	Female	39.7	20.5645	54.4545	19.5774	57.4167	20.9131	40.1111	22.8059	60.4	28.0998	50.7273	31.5788
162_y_f_n_b.jpg	b	young	Female	42.5833	26.2971	45.7	21.4789	57.5	26.8684	40.2	27.6598	59.2727	19.4427	41.6667	26.3554
163_y_f_n_a.jpg	a	young	Female	44.3333	28.6874	69.3333	19.4625	57.8	17.2356	63.5833	21.0905	65.2	23.4511	50.2727	22.5393
163_y_f_n_b.jpg	b	young	Female	50.4167	22.2648	62	27.313	58.9091	23.8472	56.6364	17.9347	60	23.0454	55.1818	24.1364
171_y_f_n_a.jpg	a	young	Female	47.5833	14.9573	68.7	17.263	61.3636	17.1188	62.6	25.2903	60.9091	21.361	52.2727	29.251
171_y_f_n_b.jpg	b	young	Female	57.3333	17.6292	50.1	26.2147	59.5455	22.1827	56.1667	26.2984	60.7273	25.0124	48.7273	28.2173
173_y_f_n_a.jpg	a	young	Female	38.6	26.0521	49.2308	22.8296	53.7273	17.8162	59.6	32.3082	64.7	19.2068	65.3333	26.7661
173_y_f_n_b.jpg	b	young	Female	40.3	23.594	52.7273	33.5353	56.8182	19.0569	55.3636	12.1266	64.5	13.778	61.3077	24.4144
177_y_f_n_a.jpg	a	young	Female	43.6364	28.3841	67.3636	21.3367	54.0769	19.1506	59.125	18.992	57.4	19.7439	63.4545	27.6527
177_y_f_n_b.jpg	b	young	Female	43.8333	28.9351	54.3	22.0154	49.6364	21.8873	50.4545	24.5982	59.0909	14.1877	49.25	23.2579
182_y_f_n_a.jpg	a	young	Female	39.0833	17.6143	63.0909	23.2399	58.4167	20.9304	58.2222	23.5254	57.4	24.9942	58.8182	20.8989
182_y_f_n_b.jpg	b	young	Female	46.25	23.9398	48.4	28.4535	56.5455	25.5553	49.2727	30.8094	68.0833	16.9355	55.9091	27.267
007_m_m_n_a.jpg	a	middleaged	Male	9.72727	12.5227	19	15.5739	29	19.3109	26.1	14.8058	40.2	23.6681	21.0909	17.9914
007_m_m_n_b.jpg	b	middleaged	Male	23.6667	21.146	25.3333	19.7611	28.25	18.4545	21.2	14.6348	32.8	27.0382	19.1667	16.5465
014_m_m_n_a.jpg	a	middleaged	Male	19.6667	14.9322	24.4	18.0197	38.3636	21.6114	39.3636	16.8183	45.2	20.1152	49	25.865
014_m_m_n_b.jpg	b	middleaged	Male	28.1667	22.3152	17.5	18.3802	36.1818	21.6278	29.8333	18.3691	52.1818	15.5616	40.8333	25.139
026_m_m_n_a.jpg	a	middleaged	Male	29.1818	20.7018	41.0833	24.5892	45.2727	13.7557	48.9	16.1069	49.3	21.271	72.2727	23.3285
026_m_m_n_b.jpg	b	middleaged	Male	34.9091	30.0415	43.3636	28.264	52.5455	13.6921	47.3636	28.3841	62.2727	17.8779	58.3636	19.876
032_m_m_n_a.jpg	a	middleaged	Male	14.8182	13.3777	17.5833	16.7303	38.6667	15.0534	34.6667	14.8492	52.3	22.0759	43.8182	22.8771
032_m_m_n_b.jpg	b	middleaged	Male	21.8333	18.5121	17.5556	17.5079	43.1818	25.6625	42.2727	25.0204	54.6	19.9844	40	23.7065
038_m_m_n_a.jpg	a	middleaged	Male	23.8182	15.4066	31.0833	14.588	47.7273	21.2748	45.8	14.5816	57.2727	18.4721	56.6	25.1537
038_m_m_n_b.jpg	b	middleaged	Male	33.6667	27.0062	29.8889	22.3743	48.6364	15.2596	43.5455	28.4512	53.7273	23.7659	55	28.1887
045_m_m_n_a.jpg	a	middleaged	Male	12.0909	14.272	20.5	18.1534	28.0909	21.8012	32.1818	14.2325	44.1	21.0684	46.0833	27.6716
045_m_m_n_b.jpg	b	middleaged	Male	22.6667	22.3824	17.9	18.9646	25.7273	17.7825	30.8182	26.1603	40.4545	17.6543	29.8333	23.4902
051_m_m_n_a.jpg	a	middleaged	Male	15.5455	16.0646	23.9167	18.657	33.9091	19.9622	32.7	13.166	46.3636	25.777	34.3636	20.3385
051_m_m_n_b.jpg	b	middleaged	Male	23	23.6559	22.9091	21.7782	37.6364	19.7042	31.4167	19.449	50.9091	20.7724	26.0833	23.4034
056_m_m_n_a.jpg	a	middleaged	Male	6.81818	9.63139	20.5833	19.3036	40.3333	21.8688	26.1	16.9931	47.8	23.7243	38.9091	27.8045
056_m_m_n_b.jpg	b	middleaged	Male	26.9091	25.0458	22	17.9666	33.6364	17.4085	34	27.4007	47.9167	20.7954	27.2727	21.6845
058_m_m_n_a.jpg	a	middleaged	Male	23.7273	19.1159	39.9167	23.9145	42.3	19.2068	38.6364	21.4302	52.5	24.3368	53	22.7756
058_m_m_n_b.jpg	b	middleaged	Male	31.2727	26.8257	28.8	21.9231	43.3636	14.8207	32.6667	26.6879	54	22.2915	51.8182	25.4315
068_m_m_n_a.jpg	a	middleaged	Male	12.2727	15.6594	22.0909	14.9964	30	20.0862	32.8	13.9746	41.8	19.8819	34.1667	22.8904
068_m_m_n_b.jpg	b	middleaged	Male	20.5833	21.4792	23.5	23.4438	30.9167	17.2914	18.6	13.2598	46.3636	16.7587	34.1667	23.4049
070_m_m_n_a.jpg	a	middleaged	Male	24.5455	17.9464	23	15.0393	45.3636	16.7766	46.1	22.4026	52	25.1237	39.1818	20.1585
070_m_m_n_b.jpg	b	middleaged	Male	20.1818	21.0229	23.2	22.8901	41.2727	14.6088	27.5455	17.7559	47.5833	22.6934	24.5455	17.3226
077_m_m_n_a.jpg	a	middleaged	Male	10.3333	14.506	24.5	17.9975	40.5833	21.0431	34.8889	14.0574	46.4545	19.2009	44.5455	26.1357
077_m_m_n_b.jpg	b	middleaged	Male	21	20.3827	17.8889	21.5026	31.7273	18.2049	32.8182	23.0079	56.6364	18.683	27.75	27.36
082_m_m_n_a.jpg	a	middleaged	Male	16.1667	16.2079	29.4167	20.246	36.4545	24.3367	34.8182	14.414	51.7273	22.3253	39.8	16.1713
082_m_m_n_b.jpg	b	middleaged	Male	30.0833	22.2075	29.4444	19.4108	36.9091	19.4394	36.6364	17.8453	54	16.6553	32.5833	20.0248
087_m_m_n_a.jpg	a	middleaged	Male	34.8	28.4636	49.3333	22.022	56.9091	14.4254	57.3	21.0768	64.9	19.9969	68.8182	25.7131
087_m_m_n_b.jpg	b	middleaged	Male	40.8333	26.9877	40.5	27.5328	55.6364	14.2637	54.8182	23.5407	66.9091	24.5498	65.5	25.3036
092_m_m_n_a.jpg	a	middleaged	Male	10.9091	11.4844	23.9167	20.5314	37.9091	19.4548	34.8	21.1755	47.5455	23.1748	39.6364	20.6701
092_m_m_n_b.jpg	b	middleaged	Male	28.2	23.4795	13	19.0205	29.4167	18.9854	28.2727	15.8372	38	24.1569	32.3846	23.2255
094_m_m_n_a.jpg	a	middleaged	Male	18.3636	17.3797	24.2	18.9608	29.1818	17.0986	34.7	24.3313	43.9	20.1574	43.75	27.1063
094_m_m_n_b.jpg	b	middleaged	Male	26.7273	25.2273	23.5	16.6416	38.1818	19.8082	24.1	13.5191	52.3	22.4996	30.4167	18.6082
104_m_m_n_a.jpg	a	middleaged	Male	17.9167	15.5298	25.2727	18.2543	38.5	18.1384	39.5556	14.1696	47.0909	20.8252	42.1818	17.221
104_m_m_n_b.jpg	b	middleaged	Male	25.6364	23.3635	23.7778	21.3587	36.9167	18.6716	39.8	25.4506	44.1	24.4606	31.6154	19.4916
108_m_m_n_a.jpg	a	middleaged	Male	25	19.1364	42.25	21.7846	41.25	19.4522	43.3333	25.045	46.6667	24.5255	40.9167	25.5893
108_m_m_n_b.jpg	b	middleaged	Male	33.25	22.8199	46.1	30.5558	47.7273	19.1838	40.7273	26.0388	53	12.1929	38.3077	21.8571
116_m_m_n_a.jpg	a	middleaged	Male	26.6	21.747	42.3077	25.3883	36.7	16.8262	44.3636	20.4562	47.1	21.6253	29.9091	17.184
116_m_m_n_b.jpg	b	middleaged	Male	32.1667	25.2509	33.2222	23.4456	48.5455	19.8613	48.7273	22.2265	49.1	17.9843	37.8333	20.7839
126_m_m_n_a.jpg	a	middleaged	Male	23.75	20.583	34.0909	21.9292	42.3636	18.8057	39.7	23.7583	57	24.3402	41.8182	25.4787
126_m_m_n_b.jpg	b	middleaged	Male	28	20.347	31.7	24.3176	44.3636	15.3119	46.9091	22.9061	51.3333	20.9559	33.1818	23.3958
136_m_m_n_a.jpg	a	middleaged	Male	12.6667	14.0734	14.1818	19.9691	21.4545	18.1348	25.4	18.0567	40.3636	23.3935	25	16.7869
136_m_m_n_b.jpg	b	middleaged	Male	18.25	19.0937	18	20.8866	21.6667	15.5173	29.4545	29.0839	35	17.8637	20	20.2529
142_m_m_n_a.jpg	a	middleaged	Male	24.75	22.9035	37.1667	24.0372	45.9167	18.466	40.5	16.8143	47.8	20.8316	43.9167	25.1015
142_m_m_n_b.jpg	b	middleaged	Male	33.3333	21.7562	34.7778	27.4398	39.0833	23.0275	36.2	20.9115	47.2	17.574	23.3333	17.4165
149_m_m_n_a.jpg	a	middleaged	Male	18.3636	14.4795	28.6364	16.9663	41.4167	17.3491	34.8889	23.5873	51.8	21.8419	47.7273	23.234
149_m_m_n_b.jpg	b	middleaged	Male	29.9091	24.5783	32.2727	22.6499	38.9167	17.0585	34.6	25.3649	46.5455	18.1514	37.0833	21.5088
155_m_m_n_a.jpg	a	middleaged	Male	14.8333	14.6339	30.1	21.9568	40.3333	17.4269	38.7778	18.7402	50	22.6329	41.6667	24.6515
155_m_m_n_b.jpg	b	middleaged	Male	16.6364	19.6483	32.0909	19.8416	38.7273	14.8398	30.8182	27.4074	51.4	19.0508	33	20.3693
159_m_m_n_a.jpg	a	middleaged	Male	29	21.7214	47.4545	28.3068	45.4545	13.7504	36.5	22.1422	51.2	21.0861	44.4167	20.5668
159_m_m_n_b.jpg	b	middleaged	Male	36.1667	20.7883	33.2222	29.312	43.4167	21.861	51.6	27.7056	50.5455	21.0493	45.5833	25.1015
165_m_m_n_a.jpg	a	middleaged	Male	13.2	11.4193	42	21.9279	43.4545	19.2009	46.5	12.9722	55.3	19.8441	36.8333	23.4514
165_m_m_n_b.jpg	b	middleaged	Male	32.25	23.7951	37.7	22.8621	44.6364	21.782	39.4545	25.1012	45.4545	24.0015	41.6667	15.3997
169_m_m_n_a.jpg	a	middleaged	Male	25.4167	19.1855	31.5	20.0901	37.8333	20.4932	31.1111	17.4459	47.1	23.8162	45.9091	25.2723
169_m_m_n_b.jpg	b	middleaged	Male	26.8182	21.8212	35.2	18.1769	40.5455	15.2142	34.8182	19.0043	43	22.141	39.9231	20.5161
178_m_m_n_a.jpg	a	middleaged	Male	22.9167	17.1806	37	17.7539	48.4545	15.0888	45.3	21.161	52.7273	19.032	57.9091	23.9769
178_m_m_n_b.jpg	b	middleaged	Male	33.9091	21.5613	35.1818	31.9744	52.4545	15.5072	43.8182	31.3363	57.9	11.8926	53.3333	21.6515
179_m_m_n_a.jpg	a	middleaged	Male	24.4167	19.8698	35.5	17.7341	55.7273	13.0314	47.6364	17.5515	56	27.8009	49.4545	25.5083
179_m_m_n_b.jpg	b	middleaged	Male	33.5833	21.3135	36.4	22.1821	46.5455	15.4231	46.5455	23.3853	51.3636	13.8512	45.3333	22.088
006_m_f_n_a.jpg	a	middleaged	Female	52.25	18.772	70.4545	18.3868	74.0909	15.6298	72.6	17.6774	69.3	21.344	72.5455	27.5513
006_m_f_n_b.jpg	b	middleaged	Female	53.4167	20.255	61.1111	28.607	62.7273	22.0821	58.0909	16.5497	71.9	7.85211	64.3846	20.7426
011_m_f_n_a.jpg	a	middleaged	Female	24.9167	20.8826	45.8	19.3379	46.9167	20.2146	51.3	15.4492	53	20.4328	49.0833	22.7415
011_m_f_n_b.jpg	b	middleaged	Female	28.25	22.7561	36.4444	31.5599	54	18.868	35.5833	22.2607	56.5455	22.124	41.8333	17.8266
019_m_f_n_a.jpg	a	middleaged	Female	22.3636	22.4289	43.2727	27.3755	49.9091	15.0894	40.5	12.8258	51.1	22.4621	55.2727	23.4482
019_m_f_n_b.jpg	b	middleaged	Female	28.2727	22.4815	30.0909	25.0498	46.2727	16.6859	39.2727	24.6945	54.3	20.4888	42.8333	18.7657
029_m_f_n_a.jpg	a	middleaged	Female	28.2727	19.7641	39	22.5469	42.1818	22.4447	51.2	14.6803	46.1818	23.3402	46.2727	22.5526
029_m_f_n_b.jpg	b	middleaged	Female	26.6667	21.3769	30.2	20.6602	48	25.0345	34.3636	22.3082	52.1667	21.379	30.3636	24.8164
035_m_f_n_a.jpg	a	middleaged	Female	9.8	10.185	28.75	18.046	33.3	20.9605	31	15.9203	41.1	26.1468	32.6364	19.8709
035_m_f_n_b.jpg	b	middleaged	Female	21.5833	17.6504	16.9	16.7229	30.7273	19.865	34.4545	27.3546	45	17.7826	29.1667	20.7839
043_m_f_n_a.jpg	a	middleaged	Female	15.4545	15.2667	36.3333	18.5391	47	20.6833	29	10.6354	38.5	20.5061	38.6364	17.3105
043_m_f_n_b.jpg	b	middleaged	Female	19.1667	18.722	31.6667	25.1645	40.1667	24.7784	29.9	25.3528	45.7273	26.329	27.5	22.9565
050_m_f_n_a.jpg	a	middleaged	Female	22.4167	14.6564	32.25	22.0212	47.1667	22.303	41.2222	21.3821	53	26.3902	46.7273	19.7539
050_m_f_n_b.jpg	b	middleaged	Female	23.9167	19.3929	25.6	22.7117	45.4167	22.7495	34.5	24.6272	50.7	25.1	39.2727	22.4236
052_m_f_n_a.jpg	a	middleaged	Female	19.5833	14.9997	44.6667	20.0378	47.8182	16.6122	37.8	13.34	61.2222	22.3483	44.25	15.9267
052_m_f_n_b.jpg	b	middleaged	Female	27.2727	23.0742	32.4	22.3318	50.1667	20.3507	39.9091	23.9936	55.8182	17.7359	42.5385	18.8972
061_m_f_n_a.jpg	a	middleaged	Female	48.3636	28.5492	68.3333	20.0605	63.6364	12.331	69.2	13.0026	65	20.9921	69.6364	29.5441
061_m_f_n_b.jpg	b	middleaged	Female	51.5	22.6455	59.5	31.5815	60.3636	25.0251	59.2727	25.6168	63.9	13.9797	70.4167	19.0476
064_m_f_n_a.jpg	a	middleaged	Female	21.1667	20.9147	42.1818	17.2963	45.4167	17.9315	41.7778	11.4212	57.6667	26.4953	48.1667	24.6349
064_m_f_n_b.jpg	b	middleaged	Female	30.5	24.7368	31	24.2579	52.4545	25.3313	36.8182	16.6482	52.4	15.2111	38.9231	19.8304
073_m_f_n_a.jpg	a	middleaged	Female	42.3846	31.1463	63	10.7051	56.9167	16.4784	54.8889	18.9766	60.5	22.2374	55	20.1842
073_m_f_n_b.jpg	b	middleaged	Female	37.75	26.9279	47.375	26.5864	60.1	19.6268	45.1818	20.9848	58	15.1921	54.9091	27.2413
080_m_f_n_a.jpg	a	middleaged	Female	30.1818	20.4295	57.4545	12.9489	54.75	18.8252	49.6667	17.1537	58.3	19.6698	51.3636	17.4486
080_m_f_n_b.jpg	b	middleaged	Female	35.2727	30.871	46.7	24.4543	53.7	20.1938	42.1667	23.1628	65.5	10.3521	55.5	20.9783
084_m_f_n_a.jpg	a	middleaged	Female	17.6364	13.3212	37.75	18.8493	34.1818	18.0877	40.9091	11.8613	54.2	19.5664	41.8333	19.6044
084_m_f_n_b.jpg	b	middleaged	Female	24.5	18.6264	34.5833	18.6375	36.75	22.2552	29.7273	19.189	48.3333	22.022	24.8	15.2883
093_m_f_n_a.jpg	a	middleaged	Female	10.3636	10.8837	34.8333	15.885	40.8182	22.7324	40.7	17.0688	59.1	24.9241	47.8182	15.6065
093_m_f_n_b.jpg	b	middleaged	Female	24.7273	22.5215	30.4	20.1616	38.0909	26.5196	33.6364	21.901	49.2727	22.6367	32.4167	22.5044
097_m_f_n_a.jpg	a	middleaged	Female	13.6364	14.5415	36.25	21.0287	33.7273	26.3024	42.3	21.7054	52.6	27.9213	40.75	18.3359
097_m_f_n_b.jpg	b	middleaged	Female	25.25	21.3035	32.4	20.9613	26.7273	17.8499	46.1818	23.8236	44.7	20.3363	27	22.3234
103_m_f_n_a.jpg	a	middleaged	Female	13.1818	15.2238	37.25	21.3334	51.4545	20.4615	45	15.1261	49.9091	22.7352	41.8182	25.1548
103_m_f_n_b.jpg	b	middleaged	Female	22	21.2389	38	22.1861	42.4545	27.631	37.5455	23.7334	43.9091	21.9884	28.3333	24.2124
111_m_f_n_a.jpg	a	middleaged	Female	36.8	26.4399	57.0769	16.3425	48.8182	17.7472	56.1	24.4243	56.3636	22.5977	59.8182	23.2328
111_m_f_n_b.jpg	b	middleaged	Female	40.5833	24.1302	51	33.0656	57.1667	20.2612	51.2	19.5891	70.9091	16.622	53.3636	22.8266
113_m_f_n_a.jpg	a	middleaged	Female	32.1818	26.2367	54.9091	12.3891	48.4545	16.1516	59.5	22.2823	55.7	19.4368	54.2727	26.9633
113_m_f_n_b.jpg	b	middleaged	Female	35	25.8668	51.3	26.4577	44.0833	20.1425	46.4	19.8057	59.5833	12.5224	42.8182	24.5716
117_m_f_n_a.jpg	a	middleaged	Female	35.8182	19.8988	55.8333	17.0552	63	25.6125	55.2222	23.5732	79.4	15.5578	70.4167	26.2036
117_m_f_n_b.jpg	b	middleaged	Female	38.9091	26.2505	41.3636	27.9366	65.2727	21.7857	59.1818	26.521	76.6667	12.4341	73.0909	17.2595
122_m_f_n_a.jpg	a	middleaged	Female	16.9091	19.8164	37.6667	15.5115	34.9091	22.2866	34.8	15.9499	50.5	27.1099	40.0833	21.5004
122_m_f_n_b.jpg	b	middleaged	Female	22	22.8394	37.2	21.2488	35.7273	20.4308	36.3636	24.764	50.3	23.7115	32.1667	20.1397
128_m_f_n_a.jpg	a	middleaged	Female	18.7273	18.9478	37.1818	12.2541	43	23.0565	43.4	17.0372	54.6	22.7752	50.9167	27.1342
128_m_f_n_b.jpg	b	middleaged	Female	21.2727	19.5862	38.9	20.3985	39.9091	22.4475	33.25	21.6758	61.0909	21.847	40.6667	21.7771
138_m_f_n_a.jpg	a	middleaged	Female	19.8182	9.94805	34.3333	21.3981	42.2727	19.1421	43.5	13.5994	53.7	27.2725	50.3636	23.2992
138_m_f_n_b.jpg	b	middleaged	Female	25.1818	20.4881	41.9091	26.1895	51.75	18.041	38.5455	27.464	49	17.1676	39.75	23.9702
139_m_f_n_a.jpg	a	middleaged	Female	35.4545	18.8009	56.9091	14.237	51.75	22.7641	57.4444	26.3017	63.5455	20.997	64.5455	26.2197
139_m_f_n_b.jpg	b	middleaged	Female	36.25	24.0232	44.2	29.9696	59.9167	24.5744	63	16.3571	63.4545	23.9515	53.9167	20.3043
156_m_f_n_a.jpg	a	middleaged	Female	12.3636	11.7921	33.5	18.9856	42.25	18.8878	37.3	16.3303	53.4	24.1532	40.4545	18.3486
156_m_f_n_b.jpg	b	middleaged	Female	19.3636	19.1534	31.4545	18.8168	44	24.6698	32	20.4059	47.1818	24.3755	26.8333	18.7802
157_m_f_n_a.jpg	a	middleaged	Female	26.7273	20.2982	51.1818	19.8233	46.0909	20.8012	45.9	15.0144	62	23.4094	60.6667	24.2874
157_m_f_n_b.jpg	b	middleaged	Female	34	26.3577	46.7	27.4754	48.5455	11.3874	49.2727	26.2834	55.7273	17.6527	49.5833	25.0398
168_m_f_n_a.jpg	a	middleaged	Female	14.75	12.6356	43.1818	18.1429	50.7273	23.9503	43.7	15.9028	57.9	24.9864	40.5833	19.7597
168_m_f_n_b.jpg	b	middleaged	Female	25.3636	23.9427	33.5455	24.5372	47	24.8837	32.8182	19.0569	51.1818	24.8106	37.3333	18.4703
180_m_f_n_a.jpg	a	middleaged	Female	22.9167	23.7198	44.5455	21.5377	38.3333	15.5817	51.3333	20.6882	46.3636	19.2628	49	24.7144
180_m_f_n_b.jpg	b	middleaged	Female	23.25	19.5733	42.6	33.1535	35.8333	22.2418	38.1	26.7393	41.1667	23.5366	33.3333	20.7247
004_o_m_n_a.jpg	a	older	Male	19.4444	16.272	33.75	26.289	43.4	14.6833	51.7273	19.2098	54.8	24.1652	46.5455	24.853
004_o_m_n_b.jpg	b	older	Male	38.4167	31.8161	45.4444	24.6785	39.4545	20.6851	47.9	19.5189	61.6364	15.6158	50.3333	16.7078
015_o_m_n_a.jpg	a	older	Male	19.4545	18.365	35.2727	27.6192	40.75	22.8558	36.6667	16.5076	47.8182	23.1509	34.6364	22.5445
015_o_m_n_b.jpg	b	older	Male	30.0833	23.5853	28.3	20.8223	31.6364	20.1061	32.7	15.8398	55.9091	20.3983	37.75	20.0187
018_o_m_n_a.jpg	a	older	Male	13.6667	16.908	26.7273	20.5528	37	27.3596	30.7778	16.4452	46.0909	24.7486	27.9091	17.7564
018_o_m_n_b.jpg	b	older	Male	22.4545	21.6257	20.2	19.9933	28.0833	18.0225	26.0909	17.1724	50.8182	20.6873	31.0833	20.9998
027_o_m_n_a.jpg	a	older	Male	24.4615	23.9778	39.4545	19.5978	43.5455	20.1909	43.8	12.7262	48.4545	21.5702	33.4545	20.1463
027_o_m_n_b.jpg	b	older	Male	33.3333	21.5716	48.1	17.773	34.7273	20.4748	32.7273	22.557	56.4545	23.2395	38.25	21.872
033_o_m_n_a.jpg	a	older	Male	20.75	19.4147	34.8182	26.6526	38.5	19.0143	43.6667	9.05539	54.4444	23.4633	47.5833	27.3544
033_o_m_n_b.jpg	b	older	Male	32	26.3335	42.8	24.6568	40.6667	17.2328	49.8182	23.8026	56.8182	15.0653	40.1667	14.6711
039_o_m_n_a.jpg	a	older	Male	13.6364	16.3418	25.2727	19.5197	38.0909	19.144	33.2727	15.5441	43.4	26.875	37.0909	30.1013
039_o_m_n_b.jpg	b	older	Male	18.4545	18.9439	27.2727	20.6451	24.8182	15.3089	27.9091	21.5799	41.1818	22.684	21.2727	17.321
042_o_m_n_a.jpg	a	older	Male	12.8333	13.5031	23.1	19.9302	32.9091	14.0318	26.2	15.2082	48.2	26.8361	30.1818	20.3018
042_o_m_n_b.jpg	b	older	Male	25.3333	23.952	22.1	20.9944	26	21.4616	27.3636	19.6686	38.5	17.4053	25.7692	18.01
046_o_m_n_a.jpg	a	older	Male	10.9167	14.7245	21.9167	16.7248	29.9091	21.4544	24	15.9562	48.1	24.1911	14.0909	11.8613
046_o_m_n_b.jpg	b	older	Male	15.1667	16.8244	21.9	22.8787	16.4545	11.501	18.25	18.8589	23.2727	20.6354	18.1667	16.7649
053_o_m_n_a.jpg	a	older	Male	18.8333	18.6296	32.3636	21.2051	45.6364	20.4072	39.3	13.6386	46.5	27.1426	31.5455	16.5733
053_o_m_n_b.jpg	b	older	Male	20.6364	20.9965	21.7273	22.9394	30.3636	18.9698	34.8182	25.5844	53.7	20.467	28.75	21.9177
059_o_m_n_a.jpg	a	older	Male	11.6364	14.3963	30.3333	17.941	45.4545	17.0433	25.3	17.9694	39.4	26.9988	26.9167	20.7472
059_o_m_n_b.jpg	b	older	Male	25.25	24.4136	25	19.709	21.5833	19.8424	21.1	11.0599	34.75	20.3565	27.2727	21.3967
065_o_m_n_a.jpg	a	older	Male	17.8182	16.142	30.1538	21.9956	47.8333	21.6872	42.6667	21.0297	43.0909	24.2506	34.7273	18.9636
065_o_m_n_b.jpg	b	older	Male	32.0833	27.9365	31.4	24.8605	31.5	18.8463	32	19.3793	45.5	16.7614	22.0833	18.8605
074_o_m_n_a.jpg	a	older	Male	9.7	9.59224	27	23.4869	46.4167	16.9247	32.2222	16.7091	44.8889	23.8875	28.75	16.6958
074_o_m_n_b.jpg	b	older	Male	27.9167	24.2054	20.8	21.1964	38.1667	20.6698	32.6	16.814	37.5455	20.0717	30.3333	25.1661
076_o_m_n_a.jpg	a	older	Male	11	14.251	19	24.2157	41.9167	20.3088	25	18.7949	46.1	26.2909	30	20.015
076_o_m_n_b.jpg	b	older	Male	18.9167	17.4796	17.1111	20.5027	28	23.435	22.9091	14.0318	49.2	20.3404	25.3077	20.7862
083_o_m_n_a.jpg	a	older	Male	14.6154	19.4959	28.6	21.188	45.0909	21.2906	40.3	15.4779	41.4545	20.2799	34.6	24.1348
083_o_m_n_b.jpg	b	older	Male	30.5833	25.2135	30.2	20.8423	31.9231	19.4056	24.5	16.4874	54.1818	23.3059	32.5	25.6036
091_o_m_n_a.jpg	a	older	Male	8	12.4681	22.8182	22.706	43.6364	19.3818	38.6	19.323	51.5	30.3361	43.4545	25.7152
091_o_m_n_b.jpg	b	older	Male	24.9167	21.6226	25.7	25.1089	22.8182	16.247	24.2727	14.0006	46.7	22.7745	38.0769	23.8588
102_o_m_n_a.jpg	a	older	Male	18.4545	15.9083	45.1818	22.2927	50.0833	17.6504	37.6	14.6985	50.3	23.8935	40.6364	29.5813
102_o_m_n_b.jpg	b	older	Male	24.8333	23.9197	27.6667	29.7616	32.8182	15.93	35.3636	21.8599	45.6364	26.0663	27.4167	17.1489
107_o_m_n_a.jpg	a	older	Male	18.4167	21.7065	22.2727	14.5196	36.9091	20.6129	29.4	17.6081	44.4	25.2639	26.0833	17.1859
107_o_m_n_b.jpg	b	older	Male	20.4167	20.3222	18.8	14.2267	24.1818	21.9218	23.9091	13.0419	41.6	12.6245	19.6923	18.3684
118_o_m_n_a.jpg	a	older	Male	13.7273	14.3045	25.75	20.0142	43.9167	21.1809	42.5556	10.2483	53.4545	24.0223	40.4	19.2019
118_o_m_n_b.jpg	b	older	Male	27.2727	23.652	38.3	28.8292	34.2	16.6587	39.25	16.097	48.4167	24.9015	34.9091	20.8588
121_o_m_n_a.jpg	a	older	Male	14.5455	16.7473	22.7273	20.785	27.6364	19.268	26.8	13.522	41	24.4677	17.0833	16.8494
121_o_m_n_b.jpg	b	older	Male	14.9091	18.9074	25.4545	17.166	24.5	17.5071	21.9167	18.268	36	21.6081	21.5455	19.8462
131_o_m_n_a.jpg	a	older	Male	17.0833	15.4417	23.5	18.686	38.7273	21.0052	30.5	17.7529	47.3	25.2149	27.0909	19.7051
131_o_m_n_b.jpg	b	older	Male	18.9091	17.9302	22.2727	20.9766	25.6667	14.6618	35.4	22.0867	37	21.8123	22.9167	21.6436
137_o_m_n_a.jpg	a	older	Male	11.2727	14.0363	21.1818	20.1932	29.5833	25.0616	30.5556	15.7092	46.6	25.8466	31.7273	19.0005
137_o_m_n_b.jpg	b	older	Male	24.3333	20.0967	24.3	23.8609	32.6364	17.1655	31.5455	23.0754	44.5	22.6434	32.6667	18.1576
141_o_m_n_a.jpg	a	older	Male	13.7273	13.146	26.4545	26.6472	42.8182	18.75	33.3	18.5715	42	24.9087	28.4545	20.2058
141_o_m_n_b.jpg	b	older	Male	22.9167	21.069	28.4	21.6703	28.2727	18.2159	31.7273	20.4455	45	18.4992	20.25	17.6539
146_o_m_n_a.jpg	a	older	Male	19.0833	19.3553	30	26.3101	34.7273	17.1295	36.7	14.2443	53.6667	28.8271	40.6154	25.1977
146_o_m_n_b.jpg	b	older	Male	32	25.5912	29.4444	24.5922	27.9091	15.3457	36.9091	23.4966	46.4545	18.9545	36.3333	23.2392
151_o_m_n_a.jpg	a	older	Male	14.5455	21.4166	24.3636	21.6484	39.7273	19.074	34.1818	21.7982	45.7	24.6849	30.2727	16.0193
151_o_m_n_b.jpg	b	older	Male	25.3333	23.0546	31	22.9202	28.5	14.0809	28.1818	18.8245	39.9091	25.54	30.1667	19.4414
161_o_m_n_a.jpg	a	older	Male	7.09091	8.34811	33.0833	23.0196	34.8182	24.0534	29.2	17.2421	44.8	24.6162	28.5455	26.5833
161_o_m_n_b.jpg	b	older	Male	20	19.084	16.8	20.8902	25.6364	18.4297	23.7273	17.63	36.8333	23.579	28.75	22.1693
166_o_m_n_a.jpg	a	older	Male	29.0909	18.4795	47.3333	21.7604	50.1538	15.1814	49.5556	17.2852	61.7778	24.8434	48.4167	24.6372
166_o_m_n_b.jpg	b	older	Male	36.8333	27.5675	45	25.9187	41	21.3635	37.1667	22.6749	61.3	18.5655	54.6923	15.1349
172_o_m_n_a.jpg	a	older	Male	3.7	3.86005	27.6667	22.7609	39.0909	22.1696	28.8	17.0932	42.7	21.6182	23.25	18.7332
172_o_m_n_b.jpg	b	older	Male	21.6667	19.9423	24.9	21.3305	20.2727	16.4869	22.5455	17.1951	31.8182	20.2821	16.0833	16.5939
176_o_m_n_a.jpg	a	older	Male	15.4545	16.1763	24.3333	15.8248	35.8182	19.8888	34.1	17.2463	46	23.1409	30.8333	23.4243
176_o_m_n_b.jpg	b	older	Male	26.8333	23.7097	28.7778	19.3957	24.1818	17.8652	28.2727	17.1644	49.7	21.5203	27.8333	23.1824
005_o_f_n_a.jpg	a	older	Female	9.41667	10.8415	16.4545	18.7743	28.5455	24.2791	36.4	15.8409	40.3	24.8061	35.0909	17.2363
005_o_f_n_b.jpg	b	older	Female	24	20.5205	18.2222	19.8984	29.3636	20.4611	30.5455	20.6561	46.3	17.9323	32.9167	19.2706
012_o_f_n_a.jpg	a	older	Female	20.6364	21.869	52.6364	19.6024	42.8	17.1192	55.9091	17.9078	46.4	25.0963	46.8182	26.5624
012_o_f_n_b.jpg	b	older	Female	30.25	20.352	44.8889	33.1	28.7273	19.8952	33	23.1128	43.4	19.7889	31.5	19.4913
021_o_f_n_a.jpg	a	older	Female	25.3636	26.6168	47	19.975	45.4167	22.5649	54	9.30054	53.8	22.4687	51.2727	29.0933
021_o_f_n_b.jpg	b	older	Female	25.9167	26.061	34.1	24.1406	37.3636	15.718	37	21.3776	62	13.9124	45.5	20.8043
024_o_f_n_a.jpg	a	older	Female	4.90909	5.68251	22.8333	15.2007	33.3333	20.0151	30.3333	18.0555	41.9	26.4762	45.9091	29.9948
024_o_f_n_b.jpg	b	older	Female	22.4167	20.6506	19.1111	17.6737	24.7273	17.4017	24.0909	18.8279	41.8182	22.6133	29.4167	16.5939
030_o_f_n_a.jpg	a	older	Female	34.75	22.5434	70.3077	16.8344	57.9091	22.3403	67.7	20.0169	55.4	25.782	48.25	28.0944
030_o_f_n_b.jpg	b	older	Female	34.75	25.093	63.1	33.0469	47.6667	18.7584	53	17.2685	63.4545	19.284	57.3333	17.1588
036_o_f_n_a.jpg	a	older	Female	18.3636	19.9463	49.3636	25.2122	40.8333	13.0998	48.2	19.5266	49.7	25.6084	42.0909	25.205
036_o_f_n_b.jpg	b	older	Female	31.6364	30.2002	45.2727	31.1804	32.5	17.7123	30.6	23.2723	50.5	17.2643	38.6154	21.9489
044_o_f_n_a.jpg	a	older	Female	8.72727	11.714	28.1818	11.686	22.3636	16.2621	29.5	12.9893	52.6364	20.925	33.4545	24.5942
044_o_f_n_b.jpg	b	older	Female	19.9091	18.6304	25.3636	20.7763	31.4	13.3932	23.6667	18.8599	44.0909	25.4458	24.5455	20.844
047_o_f_n_a.jpg	a	older	Female	23.2727	24.9202	39.5833	22.7894	46.25	20.9507	46.5	9.61769	41.6	23.4009	35.6364	24.7599
047_o_f_n_b.jpg	b	older	Female	30.1667	21.3449	25	19.2743	36.3636	16.5787	34	25.7941	54.6667	22.9043	30.2	23.9527
055_o_f_n_a.jpg	a	older	Female	26.9091	23.6451	37.8333	20.3239	42.6364	21.6577	45	14.0317	49.9	19.1395	42.0833	20.1786
055_o_f_n_b.jpg	b	older	Female	26.3636	23.6781	34.3	23.9168	32.5455	16.2072	39.9091	25.5439	52	20.0363	40	23.3495
060_o_f_n_a.jpg	a	older	Female	21.25	20.5299	39.0833	17.8604	44.7273	21.448	41.6	18.3678	45.5	20.2443	36.6364	21.9466
060_o_f_n_b.jpg	b	older	Female	29.6667	26.4793	35.7	23.5705	33.4545	19.4903	42	21.2132	50.4545	25.6685	34.2727	21.0432
067_o_f_n_a.jpg	a	older	Female	12	20.5751	34.0833	24.7366	34.3636	17.7835	56	17.4413	54.8889	22.8114	41.75	25.0095
067_o_f_n_b.jpg	b	older	Female	27.1667	21.5062	35.3	17.7015	32.9091	17.1607	33.8	22.0847	59.9091	8.5259	38.75	19.1602
075_o_f_n_a.jpg	a	older	Female	18.4545	22.5493	39.6667	26.4587	40.2727	22.1499	39.6	22.1068	47.7273	23.2641	33.7273	25.7181
075_o_f_n_b.jpg	b	older	Female	25.2727	20.7947	32.4545	27.2006	28	18.2099	28	22.6956	38.7	16.56	28.3846	26.9306
079_o_f_n_a.jpg	a	older	Female	17.3636	24.6101	42	22.9228	41.1818	18.702	49.8	17.0997	53.2	23.4179	41.4545	26.4097
079_o_f_n_b.jpg	b	older	Female	22.9167	24.5374	38.1111	20.6485	29.4545	18.9914	40.2727	20.9957	41.4	25.3254	34.5	21.509
086_o_f_n_a.jpg	a	older	Female	12.8	15.9569	32.4615	17.605	39.6364	16.5123	31.4	15.7282	36.6	25.343	21.7273	20.1697
086_o_f_n_b.jpg	b	older	Female	25.3333	22.3539	20.7	20.0724	27.9167	18.6619	24.4545	16.8188	33.4	13.9698	27	15.8114
088_o_f_n_a.jpg	a	older	Female	15.2727	25.1241	40.9	30.1421	38.6667	21.7562	40	15.5134	43.6	29.5755	26.4545	26.864
088_o_f_n_b.jpg	b	older	Female	26.4167	24.0925	36.1111	32.3861	27.75	20.5653	33.9	21.3929	33.6364	19.3457	13.4167	12.5369
096_o_f_n_a.jpg	a	older	Female	13.3846	19.6195	49	21.9317	39	20.4841	51.1	16.3194	46.9091	26.4025	48.1818	23.2973
096_o_f_n_b.jpg	b	older	Female	30	27.1226	37	28.4429	40.5	12.1543	36.4	19.2654	40.5455	17.8065	39.6667	20.8123
100_o_f_n_a.jpg	a	older	Female	17.0909	21.9429	34.0909	16.5073	44.0909	19.9723	46.8	19.4867	50.8	22.4093	30.1667	23.9311
100_o_f_n_b.jpg	b	older	Female	25.4167	26.0784	30.6667	19.564	38	20.401	27.1818	18.2308	37.9	19.5587	30.5833	22.3625
110_o_f_n_a.jpg	a	older	Female	10.3	12.798	25.25	18.1064	35.25	21.8762	27.7778	17.7114	42.5455	27.3765	24.1818	19.4875
110_o_f_n_b.jpg	b	older	Female	22.0833	21.168	30.4	20.7322	32	16.5409	27.6364	19.7751	40.3636	23.3464	22.8333	24.3864
112_o_f_n_a.jpg	a	older	Female	18.3	28.6785	34.9091	20.8876	39.0909	25.8049	39.9	20.4801	50.2	24.8319	40.4545	29.0392
112_o_f_n_b.jpg	b	older	Female	32.6364	30.1605	35.4	24.0241	30.3333	19.7223	30.7	17.9694	53.6	24.1992	41.25	37.222
120_o_f_n_a.jpg	a	older	Female	3.63636	3.90571	19	17.9109	27.8	18.1463	35.0909	19.8114	40	20.5621	24	23.7823
120_o_f_n_b.jpg	b	older	Female	18.25	15.2442	25.3	17.3976	23.8182	15.9425	21.7273	15.9818	35	20.025	26.5	19.8242
124_o_f_n_a.jpg	a	older	Female	13.5	17.738	32.4167	16.065	41.2727	17.3268	44.5	16.2019	47.4444	27.4231	28.3333	27.4071
124_o_f_n_b.jpg	b	older	Female	27.6667	25.2994	36.8	18.0911	25	16.5106	31.5455	18.7956	45.7692	22.6648	18.1	15.0883
130_o_f_n_a.jpg	a	older	Female	7	10.9627	26.0909	19.2221	27.9	27.7547	35.1818	15.2959	36.9	24.1175	26.0833	22.2239
130_o_f_n_b.jpg	b	older	Female	19.3333	19.7867	12.6667	18.0069	18.8182	16.1296	21.1818	15.3089	24.9	20.9361	34.5385	22.0628
133_o_f_n_a.jpg	a	older	Female	12.2727	16.3774	34.3333	17.4269	44.8333	14.3009	41	15.3188	46.4	26.8874	38.5455	20.8056
133_o_f_n_b.jpg	b	older	Female	21.3333	20.0197	25.2	22.3547	29.7273	19.6728	33.4545	21.7548	47.6	23.8523	32.7692	22.6905
143_o_f_n_a.jpg	a	older	Female	9.18182	13.6295	38.3636	25.061	29.0909	23.6831	35.2	16.4843	44.5455	20.5444	35.7273	25.8267
143_o_f_n_b.jpg	b	older	Female	20	19.8952	28.2	19.3838	26.4545	20.0068	26.5455	15.9334	39	20.5085	37.0833	16.7845
148_o_f_n_a.jpg	a	older	Female	7.9	10.3113	30.9167	19.3788	28.9091	18.7801	42.6	13.6398	48.2	26.8361	28.75	18.5723
148_o_f_n_b.jpg	b	older	Female	22.1667	19.9127	18.4444	17.8193	32.8333	17.2091	36.8	18.1157	51.9	21.8299	35.5	21
154_o_f_n_a.jpg	a	older	Female	10.3636	20.368	29.1818	18.3402	31.9091	16.4344	44.3636	15.9454	46.4	30.9953	36.0909	28.9602
154_o_f_n_b.jpg	b	older	Female	20	18.839	25.5556	20.8813	24.0833	21.3944	33.4	18.4523	31.4545	16.6515	21.5833	25.4396
158_o_f_n_a.jpg	a	older	Female	17	18.6548	57.5	15.6292	60.3	20.0447	52.9091	11.597	49.6	27.2119	41.4545	27.5077
158_o_f_n_b.jpg	b	older	Female	27.6364	23.4276	48	26.4915	38.5455	20.481	40.4167	22.6934	48.3636	26.3411	40.0833	22.3788
164_o_f_n_a.jpg	a	older	Female	11.2	16.8905	42.0833	21.3774	34.2727	15.3629	40.2	23.6352	48	23.3429	40.8182	25.8489
164_o_f_n_b.jpg	b	older	Female	25.25	21.376	39.4444	20.0194	34.3077	22.6656	30	21.6692	35.9	23.8442	27.8462	17.009
174_o_f_n_a.jpg	a	older	Female	11.9167	18.1532	23.3	18.0804	29.3636	21.271	34	20.6182	48.1111	22.352	29.4167	18.4364
174_o_f_n_b.jpg	b	older	Female	20.25	18.5674	22.8889	14.3566	21.3333	18.327	22.1818	13.1592	40.3	21.2449	22	18.5796

## Sheet: attr_happy
Picture	Set	Face Age	Face Gender	Mean_YM_attr	SD_YM_attr	Mean_YF_attr	SD_YF_attr	Mean_MM_attr	SD_MM_attr	Mean_MF_attr	SD_MF_attr	Mean_OM_attr	SD_OM_attr	Mean_OF_attr	SD_OF_attr
008_y_m_h_a.jpg	a	young	Male	28.4167	22.468	42.1818	22.1396	44	23.1862	53.3636	16.651	56.4444	14.7996	55.5833	32.1345
008_y_m_h_b.jpg	b	young	Male	41.75	25.2339	44.2	31.8845	54	16.8415	53.4	27.4234	68.6364	18.9487	50.4167	25.058
013_y_m_h_a.jpg	a	young	Male	30.7273	23.0265	37.1538	19.0694	46	17.72	53.6667	13.8564	63	24.5855	61	25.7604
013_y_m_h_b.jpg	b	young	Male	36.75	20.6623	35.3333	27.2718	58.2727	17.63	58.4545	20.4859	65.3636	16.4577	57.8182	28.642
016_y_m_h_a.jpg	a	young	Male	31.1818	29.3251	58.4167	24.53	61	21.8586	63.5	25.9925	61.7	14.8851	61.8333	26.4122
016_y_m_h_b.jpg	b	young	Male	37.4167	26.7733	54.8889	31.3466	66.6364	13.9375	70.2727	23.4183	69.3636	18.2772	68.9167	23.2671
025_y_m_h_a.jpg	a	young	Male	27.8	24.2981	30.6667	20.5485	46.9091	19.2065	50.1	21.3305	59.3	25.7468	72.1818	19.4258
025_y_m_h_b.jpg	b	young	Male	29.0833	21.694	29.8889	22.1159	52.0833	17.3962	48.0909	30.4876	71.5455	17.8626	56.5833	26.5654
031_y_m_h_a.jpg	a	young	Male	44.7	26.8992	64.8333	25.1173	56.8182	17.781	66.3636	17.4544	62.6	18.8397	73.8182	25.6547
031_y_m_h_b.jpg	b	young	Male	45.75	23.1482	53.9	34.1026	68.1667	21.0878	68.6	27.7577	67.5	16.318	70.4615	22.9042
037_y_m_h_a.jpg	a	young	Male	30.4615	20.755	37.4545	25.1092	52	21.4429	58.2	23.4843	62.6	21.0037	66.2727	18.9372
037_y_m_h_b.jpg	b	young	Male	29.7273	22.1589	39.6364	32.1038	50.0769	13.1559	52.5	26.7924	71.7273	19.4889	54	30.5465
041_y_m_h_a.jpg	a	young	Male	23.25	21.1751	48.7273	21.6937	58	14.9198	54.5	19.0511	61.7	15.7131	59.2727	26.7585
041_y_m_h_b.jpg	b	young	Male	46.5833	27.5168	47	33.1248	55.25	14.827	63.8182	32.065	60.3636	19.6024	65.6667	22.9281
049_y_m_h_a.jpg	a	young	Male	30.3	27.5481	45.6923	22.5107	51.1818	26.8954	56.1	19.5871	54.1	19.7903	45.5	24.5487
049_y_m_h_b.jpg	b	young	Male	39.75	28.4545	43.6667	25.3919	61.2727	11.816	56	26.5623	56.1	26.2105	56.7692	29.0004
057_y_m_h_a.jpg	a	young	Male	43.3333	29.4845	53.9091	24.4559	57	25.3535	53.1	25.1946	67.2	21.7143	66.1818	28.3578
057_y_m_h_b.jpg	b	young	Male	38.5	26.5176	62	26.1151	52.1667	23.2098	69.3	18.9153	66.3	10.9448	68.9167	16.6431
062_y_m_h_a.jpg	a	young	Male	35.1818	23.6466	53.4545	29.0942	49	10.9876	56.3333	19.2614	62	25.3929	75.4545	25.758
062_y_m_h_b.jpg	b	young	Male	42.9167	23.2201	58.6667	30.541	56	15.1063	57	25.6476	72.4	13.6561	60.0769	27.7262
066_y_m_h_a.jpg	a	young	Male	40.0909	30.0648	54.9	25.2254	55.3333	16.9348	55.7778	23.0097	64.5	24.4142	71.0909	26.7599
066_y_m_h_b.jpg	b	young	Male	43.4167	18.4857	48.2222	30.6095	62.7273	12.7913	65.3636	21.4069	76.3333	13.7201	67.9167	17.8145
072_y_m_h_a.jpg	a	young	Male	32.1818	24.9232	64.5	23.4889	64.3333	14.8712	63.875	22.0741	67.4	12.1399	74.4167	21.9232
072_y_m_h_b.jpg	b	young	Male	46.9091	25.0777	59.6364	31.462	59.9167	18.6033	68.9	28.5169	73.6364	16.2682	62.9167	25.0071
081_y_m_h_a.jpg	a	young	Male	25.9231	16.8397	52.0833	23.3178	48.6364	14.3824	33.7	19.1082	53.6	19.3919	38.6667	16.5548
081_y_m_h_b.jpg	b	young	Male	31	23.3355	43.4444	24.2802	45.3333	21.9807	42.6	28.5276	61.8182	22.3285	33.0909	26.7038
089_y_m_h_a.jpg	a	young	Male	35.4545	31.4304	56.0833	22.5488	60.8182	15.8985	66.2	26.093	57.3	23.6364	60.1818	32.7042
089_y_m_h_b.jpg	b	young	Male	46.3636	22.7036	56.3636	28.2958	58.2727	9.20968	73.3636	27.3506	72.6364	15.351	66.4545	29.3168
099_y_m_h_a.jpg	a	young	Male	34.0909	26.8569	40.3333	23.3602	57.1667	19.9309	47.8889	17.3453	57.8182	18.2747	64.1818	25.1548
099_y_m_h_b.jpg	b	young	Male	34.5833	23.0788	38.8889	27.926	55.7273	19.6423	58.5455	27.0236	64.9	23.2974	57.1667	29.3872
105_y_m_h_a.jpg	a	young	Male	36.1818	27.2867	48.2727	28.2917	43.1667	17.0712	50.8	20.547	56.5	23.8991	64	23.013
105_y_m_h_b.jpg	b	young	Male	38.5833	19.2706	39.125	25.7373	52.25	23.2736	54.8	25.8448	63.3333	26.932	48.8182	27.6905
109_y_m_h_a.jpg	a	young	Male	34.6667	21.4914	49.0833	24.6114	56	16.7212	49.7273	21.029	58.8182	23.2371	58.7273	25.4483
109_y_m_h_b.jpg	b	young	Male	37.5	24.9927	30	23.5319	52.5833	19.2281	53.7	27.0105	65	26.579	58.2727	30.8256
114_y_m_h_a.jpg	a	young	Male	33.4545	29.5139	39.3333	26.8068	63.5455	20.4077	54.4	23.3961	61.2222	20.4559	71	25.5272
114_y_m_h_b.jpg	b	young	Male	36.1818	23.4214	41.6	26.9452	54	16.2111	56.6364	25.5784	67.2	17.2034	61.3333	32.3625
119_y_m_h_a.jpg	a	young	Male	44.1667	24.4831	59.5833	23.8916	65.3636	14.1016	62.3	21.8584	67.9091	13.0496	66	22
119_y_m_h_b.jpg	b	young	Male	53.25	16.6249	54.1111	30.3622	65.6364	15.6989	66.1818	22.5292	72	16.8259	62.4615	29.9155
123_y_m_h_a.jpg	a	young	Male	36.5	29.0939	56.7273	24.1416	57.75	18.5478	52.6667	23.4734	55	16.2404	62.4545	26.6922
123_y_m_h_b.jpg	b	young	Male	35.3636	24.4142	45.0909	28.707	48.0909	18.5874	56.8182	25.9916	64.8	17.5929	54.8462	22.7407
127_y_m_h_a.jpg	a	young	Male	33.9	20.2783	60.0833	30.533	60.3333	11.4363	63	24.9889	58.5	25.3783	62.3636	27.9295
127_y_m_h_b.jpg	b	young	Male	49.5833	18.5151	48.9	27.6464	64	12.9965	65.2	31.2971	70.9091	17.6604	63.8182	24.1736
135_y_m_h_a.jpg	a	young	Male	27.3333	14.0087	28.6	21.8998	53.7273	19.267	42.3	18.9153	53.4444	21.0838	44	19.9408
135_y_m_h_b.jpg	b	young	Male	23.5455	19.5364	41.3636	21.8736	44.0833	18.9519	53.1	25.7572	58.2	15.6759	49.8333	27.0482
144_y_m_h_a.jpg	a	young	Male	30.9167	23.126	58	26.6383	70.0909	21.2389	66.3	17.0493	60.6	18.8456	65.3636	21.9284
144_y_m_h_b.jpg	b	young	Male	43.0833	27.6684	56.4444	31.887	68.0909	14.8085	65.2727	23.2211	68.2727	17.8162	62.25	23.7874
147_y_m_h_a.jpg	a	young	Male	38.8	25.8362	56.5	26.7972	52.9091	17.4783	55.7	18.4273	58.1	20.2893	78.1818	25.9878
147_y_m_h_b.jpg	b	young	Male	45.6667	25.5105	51.1	28.1995	52.0909	26.5272	66.3636	23.2391	69.7	14.3917	65	28.4459
153_y_m_h_a.jpg	a	young	Male	32.9	23.5157	66.0909	23.4838	56.8182	20.7452	64.7	19.9614	58.7778	18.1023	54	20.9415
153_y_m_h_b.jpg	b	young	Male	46.8333	24.1579	49.1111	25.2064	63.0833	19.2895	65.1	21.8858	69.1	12.8015	56	31.3815
160_y_m_h_a.jpg	a	young	Male	30.4167	17.5885	42.4167	22.0514	53.7273	12.5705	58.4	19.9455	60.1818	15.3806	68.1818	24.9111
160_y_m_h_b.jpg	b	young	Male	40.6667	25.9802	37.8	25.8147	62.6364	13.6475	65.1818	24.4328	79.1818	14.3654	62.75	28.3681
167_y_m_h_a.jpg	a	young	Male	25	16.3768	27.25	24.6692	50.8182	24.6529	44.3	19.2414	55.6	21.8642	51.9091	24.6189
167_y_m_h_b.jpg	b	young	Male	32.75	25.2051	43.1	29.3464	51.1818	23.8823	54.3636	28.5246	63.6667	24.6552	51	29.706
170_y_m_h_a.jpg	a	young	Male	29.1667	19.1018	36.3	27.0064	55.5833	16.9944	48.1111	12.3637	57	21.7511	45.3636	28.9215
170_y_m_h_b.jpg	b	young	Male	36.75	24.8637	44.9	23.3307	51.5455	17.6429	45.2727	32.8971	51.8182	21.9309	47.1667	29.6336
175_y_m_h_a.jpg	a	young	Male	33	19.582	58.25	21.6716	50.5	22.7056	59.7778	21.707	60.8	22.651	61.4545	27.1675
175_y_m_h_b.jpg	b	young	Male	37.1818	19.9189	63.5	31.0134	53.6364	19.2004	63.8182	26.4417	69.1818	18.7127	58.1818	26.8396
010_y_f_h_a.jpg	a	young	Female	59.9091	18.6572	65.6364	9.17903	68.5833	18.9423	64.5556	25.3284	66.5556	22.0404	61.4167	26.5517
010_y_f_h_b.jpg	b	young	Female	60.0833	26.8885	57.5	22.8874	62.2727	29.4689	60.8182	28.3613	71.2727	16.8588	59.0833	25.3322
020_y_f_h_a.jpg	a	young	Female	82	18.0151	70.4545	20.2305	69.3636	18.1178	71.9	20.1409	75.9	13.7311	75.2727	25.1757
020_y_f_h_b.jpg	b	young	Female	72.5455	28.1757	64.9091	33.4797	69.9167	27.454	81.8	19.0426	80.7778	14.1225	75.9167	16.9944
022_y_f_h_a.jpg	a	young	Female	61.8182	21.9537	71.4167	13.2491	67.9167	19.081	79.2222	20.8073	72.7	22.9058	69.0909	25.493
022_y_f_h_b.jpg	b	young	Female	71.6667	20.694	58.7	39.4885	71.3636	23.8674	72.5455	22.4248	77.2727	14.8195	73.8333	22.6749
028_y_f_h_a.jpg	a	young	Female	54.0909	26.7898	65.2	17.7188	68.0909	13.0572	63.6	23.5193	69.3	12.5702	61.0833	26.8039
028_y_f_h_b.jpg	b	young	Female	46.1667	23.8245	65.3	25.4299	57.1818	24.4982	59.8333	21.0835	67.5	16.9722	57.3636	27.9581
034_y_f_h_a.jpg	a	young	Female	23.0909	18.2288	39.75	24.0383	46.0909	24.5905	51.2727	22.5082	55.8182	24.3714	52.8182	19.5029
034_y_f_h_b.jpg	b	young	Female	35.1667	20.8929	42.6667	31.4523	44.7273	21.772	48.1818	27.5239	52.7	24.4361	42.75	27.6508
040_y_f_h_a.jpg	a	young	Female	75.1667	21.8376	67.1667	15.1588	70	19.1416	72.5	22.3868	70.2	15.2956	69.9091	26.7935
040_y_f_h_b.jpg	b	young	Female	65.3333	27.7892	59.2	31.0619	61.5455	23.3125	61.6364	28.9008	75.2727	21.8819	57.8333	25.0267
048_y_f_h_a.jpg	a	young	Female	72	25.6975	76.8182	15.2959	72.3333	13.6604	71.1111	23.3583	67.8	23.2513	69.9091	26.6963
048_y_f_h_b.jpg	b	young	Female	63.9091	26.22	64.3636	27.7318	75.6364	22.5134	77.3636	22.0648	77.7273	17.1877	77.0833	18.5348
054_y_f_h_a.jpg	a	young	Female	58.4545	15.0888	62	22.9686	52.5833	19.1618	69.1	18.0089	63.5	25.387	61.0833	26.9291
054_y_f_h_b.jpg	b	young	Female	61	19.0359	58.4	28.6325	55.2727	30.1267	58.3	21.3596	67.2727	14.9739	52	28.7845
063_y_f_h_a.jpg	a	young	Female	56.2727	19.8851	56.1818	13.144	63.5455	28.7623	66	14.1264	65.8	22.3448	72.7273	21.9093
063_y_f_h_b.jpg	b	young	Female	44.6667	24.7178	56	31.0841	67.5	29.287	64.7273	28.1819	64.7	21.5254	65.0769	28.7445
069_y_f_h_a.jpg	a	young	Female	70.3636	26.4169	69.5385	22.3107	71.75	12.1889	74.6667	23.6485	78.1	11.7327	72.0909	23.6916
069_y_f_h_b.jpg	b	young	Female	59.1818	22.864	74.6364	27.4892	71.7273	25.6519	69.6364	23.6401	76.3636	12.3148	68.4167	22.3463
071_y_f_h_a.jpg	a	young	Female	45.3636	19.2783	64.75	12.4545	63.2	21.5706	52.3636	23.5256	58.2	21.2854	55.7273	27.4157
071_y_f_h_b.jpg	b	young	Female	41.8333	29.3624	59.3333	21.6391	56.9091	25.197	50.2727	26.9002	65.0833	22.6453	51.7273	31.8719
085_y_f_h_a.jpg	a	young	Female	39	25.4666	48.4545	21.9653	47.1	28.0375	70.2727	20.6402	59.6	25.1007	62.6667	23.0388
085_y_f_h_b.jpg	b	young	Female	49.4545	29.1697	40	31.3227	57.9167	25.8614	65.6	23.5806	68.8	16.1576	69.6154	21.7276
090_y_f_h_a.jpg	a	young	Female	56.5455	26.5984	67.5833	12.7526	56.7273	22.9917	70	24.2487	62.7	22.7696	70.3636	24.5205
090_y_f_h_b.jpg	b	young	Female	53.1667	23.2685	48	34.6374	62.7273	26.3442	69.5455	19.6945	70.5	20.5494	64.3333	29.4104
098_y_f_h_a.jpg	a	young	Female	71.1818	28.2695	75.8333	22.8387	69	12.6016	76.7	23.1807	66.3	20.9181	67.7273	27.9431
098_y_f_h_b.jpg	b	young	Female	62.3333	24.8096	70.7	29.8591	65.4545	24.7845	73	21.2226	70.4	13.922	72.8333	20.5596
101_y_f_h_a.jpg	a	young	Female	51.0909	29.609	70.3333	15.2931	63.8	21.4051	70.7273	22.5703	61.2727	25.3025	61.5455	28.5635
101_y_f_h_b.jpg	b	young	Female	56.4167	17.6865	59.6	32.0597	59.0769	23.0234	65.5	30.7544	74.3636	16.9309	68.25	19.9551
106_y_f_h_a.jpg	a	young	Female	58.1818	27.9457	61	23.2965	57.9167	27.1107	69.1111	19.6051	68.5	24.7263	71.6364	31.5952
106_y_f_h_b.jpg	b	young	Female	60.25	26.3547	63.7	32.2113	63.8182	23.7774	58	25.1251	72.4167	17.671	68	29.9566
115_y_f_h_a.jpg	a	young	Female	85.5455	13.4266	79.0833	15.0119	69.8182	13.3403	81.3	20.1056	79	14.5144	79	15.4467
115_y_f_h_b.jpg	b	young	Female	70.8333	16.667	72.5556	29.1767	73.8182	24.0326	77.7273	22.1228	78.8182	13.4597	72.8333	18.0496
125_y_f_h_a.jpg	a	young	Female	17.5833	24.0887	36.9091	17.8127	41.2727	27.295	43	23.2522	54.9	24.0899	54.7273	24.3766
125_y_f_h_b.jpg	b	young	Female	30.0833	22.1583	36.6	25.596	50	25.671	44.3636	32.0633	49.3636	25.0091	49.4167	27.6059
132_y_f_h_a.jpg	a	young	Female	48.8182	22.6664	65.5455	14.3204	61.8182	26.7538	53.6	25.635	62.7	20.1276	63.8182	28.5651
132_y_f_h_b.jpg	b	young	Female	47.5833	26.5346	45.3	28.8446	59.7	21.4116	51.8182	25.7364	61.5	25.9968	65.2308	25.0172
134_y_f_h_a.jpg	a	young	Female	62.0909	28.78	60.3333	18.6564	77.0909	15.7699	73.2	15.433	70.1	21.6151	74.6364	20.578
134_y_f_h_b.jpg	b	young	Female	65.4167	23.5699	64.8889	34.1776	64.4167	25.9561	70.1	28.4779	76.8182	17.0694	62.8333	28.3672
140_y_f_h_a.jpg	a	young	Female	73.4545	21.5933	77.1667	18.8864	68.1818	15.6001	79.6	15.7212	72.1	16.3805	75.8182	19.8183
140_y_f_h_b.jpg	b	young	Female	67.0833	24.8978	69.8	37.8265	70.6364	24.9891	70.1818	19.9189	75.8	12.568	64.8182	26.5963
150_y_f_h_a.jpg	a	young	Female	69.3333	19.4438	70.5	15.1267	72.0909	17.5354	65	15.107	72.7	21.613	70.6667	27.3673
150_y_f_h_b.jpg	b	young	Female	61.5833	24.5003	54.4	30.0378	54.2727	23.8121	64	31.8319	75.2727	15.0472	70.4167	24.8832
152_y_f_h_a.jpg	a	young	Female	74.6364	26.583	77	16.0187	72.5455	16.0957	77	20.0278	72.4545	21.9379	76.1818	22.099
152_y_f_h_b.jpg	b	young	Female	78.5455	15.9083	74.4545	26.7969	75.3636	26.0472	70.3636	25.3033	73.8182	19.6001	65.6667	24.1297
162_y_f_h_a.jpg	a	young	Female	47.4	17.5005	58.6364	20.1409	62.8333	20.8101	60.8	24.8811	58.3636	20.1558	65	21.265
162_y_f_h_b.jpg	b	young	Female	55.3636	22.1372	66.9091	21.0877	59.7273	28.4784	63.7273	20.239	66.3636	21.6669	51.75	23.557
163_y_f_h_a.jpg	a	young	Female	47.7	25.8631	72.3636	20.9775	57.3333	16.9348	64.8889	20.009	58	24.3767	63	25.0962
163_y_f_h_b.jpg	b	young	Female	49.75	21.2736	64.6	31.412	65.9167	28.0112	70.5	16.7548	64.8182	19.2136	67.8182	19.5132
171_y_f_h_a.jpg	a	young	Female	45.75	9.67776	59.0909	20.878	61.25	22.8438	61.6667	19.4679	66.3	22.5883	55.7273	20.9337
171_y_f_h_b.jpg	b	young	Female	55.5833	14.5193	46.4444	23.6596	59.75	23.6802	59.3	28.7056	71.0909	20.9354	49.4167	28.2729
173_y_f_h_a.jpg	a	young	Female	46.7273	19.6931	64.3333	24.2687	62.5455	12.1356	62.2222	30.7074	70	14.3805	71.9091	26.3418
173_y_f_h_b.jpg	b	young	Female	49.4545	22.2502	60.2	29.5778	61.4545	31.1909	60	27.2764	69.0909	24.4845	72.25	24.7795
177_y_f_h_a.jpg	a	young	Female	34.6364	28.1541	61.8462	17.9204	49.8182	20.054	65.2	17.8438	57.9	23.6805	68.7273	24.8519
177_y_f_h_b.jpg	b	young	Female	52.1818	22.2478	60.1818	28.3754	56.4545	25.1729	60.6364	31.0073	70.9	18.3935	68.5	21.1123
182_y_f_h_a.jpg	a	young	Female	47	20.1133	64.4167	20.9652	61.4545	20.4517	61.8	18.5101	64.1	24.159	60.9091	24.6027
182_y_f_h_b.jpg	b	young	Female	40.4545	26.4513	41.4	26.0691	53.1667	24.6644	57.1	22.8252	59.3	19.9112	55.7692	29.9587
007_m_m_h_a.jpg	a	middleaged	Male	17.0909	18.7801	29.2727	24.4462	32	24.3758	25.7	18.4995	43.9	24.982	29.6364	14.7734
007_m_m_h_b.jpg	b	middleaged	Male	18.5455	20.868	28.2727	26.6949	29.75	25.2807	31.8182	20.8893	45.8333	27.4088	30.0909	24.0186
014_m_m_h_a.jpg	a	middleaged	Male	21.5455	19.9768	26.6364	18.5756	43.6364	20.8148	47.8182	18.6484	58.3	22.2164	42.9091	21.083
014_m_m_h_b.jpg	b	middleaged	Male	29.3333	22.4472	43.5	26.9578	47.5	17.7654	47.6364	20.0663	48.9091	25.6844	41.75	29.2796
026_m_m_h_a.jpg	a	middleaged	Male	33.4545	24.9654	37	23.1769	49.5833	23.0788	52.6667	13.9821	55.8	19.96	64.5455	21.3839
026_m_m_h_b.jpg	b	middleaged	Male	31.1667	22.164	36.3	22.8184	42.7273	22.3074	46.3636	27.7535	63.0909	23.0758	61.2727	24.3889
032_m_m_h_a.jpg	a	middleaged	Male	18.8333	18.5121	26.5	20.392	38	22.7728	38.7	19.4939	52.4444	21.1489	37.8333	18.2997
032_m_m_h_b.jpg	b	middleaged	Male	22.6667	19.9058	25.6	20.3317	38.7273	22.9351	45.9091	26.5347	58.9091	14.7136	41.6667	32.0293
038_m_m_h_a.jpg	a	middleaged	Male	22.2	15.1129	33.3636	15.2465	50.1818	14.2465	48.5	15.7215	55.2222	23.9988	56.1667	26.6248
038_m_m_h_b.jpg	b	middleaged	Male	39	23.2653	41.5556	22.3445	42.9091	21.6493	57.9091	24.1224	64.4	14.8039	54.4167	30.6014
045_m_m_h_a.jpg	a	middleaged	Male	27.0909	24.9137	23.1818	20.6534	38.0909	19.0864	44.6	22.1871	53	23.4805	46.7273	27.0114
045_m_m_h_b.jpg	b	middleaged	Male	27.3636	20.8628	23.8182	21.1179	38.9	20.8617	33.5	23.9298	60	25.2705	50.0833	27.7307
051_m_m_h_a.jpg	a	middleaged	Male	38.0909	24.9297	26	18.2373	46.4167	14.7183	54	16.3299	54.2	21.2383	49	25.923
051_m_m_h_b.jpg	b	middleaged	Male	31.8333	23.5713	27.4444	29.1037	43.0833	24.2392	52.8	28.7935	68	19.6237	50.9	33.818
056_m_m_h_a.jpg	a	middleaged	Male	23.8	29.7277	32.0769	17.9	38.8333	25.1715	44.5556	18.7357	52.1111	25.8285	44.4167	15.7737
056_m_m_h_b.jpg	b	middleaged	Male	32.3333	22.9241	30.2	21.8317	40.7273	25.0443	45.8333	32.2993	61.6	23.829	49.6667	25.6562
058_m_m_h_a.jpg	a	middleaged	Male	27.9091	20.3934	39.6923	19.1937	43.0833	21.589	46	19.7864	54.6364	20.4268	54.5455	26.0398
058_m_m_h_b.jpg	b	middleaged	Male	27.3333	22.936	39.4	23.8057	46.0909	17.2769	49.2	25.3675	58.9	25.7097	49	29.1703
068_m_m_h_a.jpg	a	middleaged	Male	22.2727	19.1211	15.4167	19.5051	41.6364	23.0012	41	17.6131	50.4	25.3342	52.5455	27.4677
068_m_m_h_b.jpg	b	middleaged	Male	23.1667	20.6698	18.5	17.9954	26.3846	17.2701	42.4	26.2179	53.1667	21.6494	43.8182	27.5457
070_m_m_h_a.jpg	a	middleaged	Male	25.6923	18.9005	25.4545	21.6765	47.3636	18.8429	39.5	19.0511	48.2	22.0797	43.6364	26.2384
070_m_m_h_b.jpg	b	middleaged	Male	27.6364	23.3078	25.1818	24.0866	47.1818	22.1893	49.1818	26.2557	57.6667	27.4502	51.3636	18.1454
077_m_m_h_a.jpg	a	middleaged	Male	20.0769	16.1682	28.9091	14.6728	32.7273	16.6919	30.3	16.1799	48.6667	21.6275	39.25	21.0157
077_m_m_h_b.jpg	b	middleaged	Male	18.5	19.0955	17.9	21.6715	43.0909	20.501	44.3636	30.1041	59.3	21.6695	40.3077	24.2294
082_m_m_h_a.jpg	a	middleaged	Male	20.2727	19.0688	32.8333	19.6969	43.7273	21.0242	48.1	11.5897	52.7	21.6233	46.1818	17.5774
082_m_m_h_b.jpg	b	middleaged	Male	27.5	22.9921	41	23.0868	33.8182	20.3608	53.7273	25.9464	53.6923	20.0307	41.2727	29.4655
087_m_m_h_a.jpg	a	middleaged	Male	27.7273	22.8871	44.1667	19.8761	59.4545	16.5733	55.7	20.1387	64.3	20.089	62.3636	25.3072
087_m_m_h_b.jpg	b	middleaged	Male	39.1667	23.0408	41.1	31.4553	60.1818	15.3936	56.9167	29.6662	65.4	21.6138	66.4615	21.9568
092_m_m_h_a.jpg	a	middleaged	Male	22.6364	20.3483	27.0833	17.8654	36.9091	23.4881	34.2	15.0244	50.5	25.2466	38.7273	17.1994
092_m_m_h_b.jpg	b	middleaged	Male	25.6364	22.4556	32.5	23.7218	36.2727	24.6418	46.2727	25.1559	54.8333	23.679	35.5455	25.3352
094_m_m_h_a.jpg	a	middleaged	Male	26.9167	22.2157	21.1667	18.8623	42.9091	26.22	37.2	16.9299	48.1	22.3579	38.7273	27.5539
094_m_m_h_b.jpg	b	middleaged	Male	34.75	21.1708	38	29.4958	42.6364	27.6668	47.8182	33.6209	54.4545	25.878	54.1818	25.0871
104_m_m_h_a.jpg	a	middleaged	Male	30.1	25.9848	24.75	15.6909	39.2727	19.1525	43.1	13.1694	52.1	22.7667	44	22.3204
104_m_m_h_b.jpg	b	middleaged	Male	34.75	25.6661	28.6667	26.6927	54.7273	17.3095	45.0909	24.1431	60.4	23.5193	47.25	23.9436
108_m_m_h_a.jpg	a	middleaged	Male	23.3	20.7635	37.0833	23.6161	45	25.7121	51.1818	15.8102	38.3	22.7745	43.3636	25.9626
108_m_m_h_b.jpg	b	middleaged	Male	33.4167	19.8424	45	26.9361	39.8182	23.6043	45.3636	25.7071	52.8182	22.5912	42.1667	26.0029
116_m_m_h_a.jpg	a	middleaged	Male	32.2727	20.8235	44.25	20.1094	51.6364	16.8123	48.1	24.0945	51.8182	21.4747	44.5455	26.572
116_m_m_h_b.jpg	b	middleaged	Male	32.7273	22.9743	35	25.9307	46.8333	23.9273	50.9	23.0336	61.9091	24.0394	52.0833	23.3217
126_m_m_h_a.jpg	a	middleaged	Male	22.7273	20.1896	23.1667	19.2535	51.1667	16.4805	44.1111	16.729	50	25.9904	43.75	29.9276
126_m_m_h_b.jpg	b	middleaged	Male	22.9091	17.5354	34.8182	24.2768	41	18.9526	45.2727	28.7092	57.1	22.6345	46	25.6373
136_m_m_h_a.jpg	a	middleaged	Male	19.9167	23.4887	23.6667	19.9195	40.4545	23.0537	40.1	18.1809	47.2222	20.5838	33.25	28.1461
136_m_m_h_b.jpg	b	middleaged	Male	29.5	23.4424	31.2222	27.1145	29.1818	22.7983	47.7273	27.9467	50	29.5512	36.8182	24.2768
142_m_m_h_a.jpg	a	middleaged	Male	27.25	23.0143	39.25	23.1914	43.9091	17.3231	45.6364	16.1138	45.5	24.8249	41.9091	23.8095
142_m_m_h_b.jpg	b	middleaged	Male	36.5833	23.4151	35.8	24.5981	35.75	22.5353	48.6	30.573	53.0909	18.2234	38.4167	24.927
149_m_m_h_a.jpg	a	middleaged	Male	33.9	26.1808	31.5	19.2566	49	16.9823	54.9	21.1789	55.4	16.9194	52.6364	27.5655
149_m_m_h_b.jpg	b	middleaged	Male	33.0833	24.2392	41.7	21.6387	43.1818	17.5944	48.6667	29.6566	56.1	25.0309	50.75	16.1759
155_m_m_h_a.jpg	a	middleaged	Male	13.9167	16.4894	17.7273	19.2046	36.75	19.7582	36.4444	22.1986	50.8	23.8411	32.8333	19.0016
155_m_m_h_b.jpg	b	middleaged	Male	20.3333	19.4625	22.1111	20.8233	38.5455	14.4524	38.1818	29.2192	49.9091	25.5713	35.8333	21.0447
159_m_m_h_a.jpg	a	middleaged	Male	26.4	22.4311	39.8333	28.4056	50	22.0227	56	20.4722	53.4	24.7754	44.5455	21.3465
159_m_m_h_b.jpg	b	middleaged	Male	43.3333	26.6742	29.1111	26.9	45	25.7541	54.5	31.9592	67.0909	17.0907	56.8333	22.1763
165_m_m_h_a.jpg	a	middleaged	Male	23.1667	22.0818	40.4	24.8158	55.4545	14.1941	62.5	21.1358	49.5556	19.3979	51	28.7497
165_m_m_h_b.jpg	b	middleaged	Male	34.75	24.1966	39.5	23.0519	45	13.6951	55	22.8593	63.6364	14.8746	52.8333	23.579
169_m_m_h_a.jpg	a	middleaged	Male	30.6	23.5617	37.2727	24.0586	44.9167	11.9807	50.1	22.0225	47	23.9444	49.3636	24.3157
169_m_m_h_b.jpg	b	middleaged	Male	36.4167	23.2944	34.6	21.6703	47.4167	17.9568	53.6	25.9281	54	18.7326	50	23.7739
178_m_m_h_a.jpg	a	middleaged	Male	31.6364	21.8873	45	19.4987	50.7273	16.224	60.5	17.5642	59.6	21.4642	60.4545	24.3859
178_m_m_h_b.jpg	b	middleaged	Male	42.6667	24.0278	44.7	30.5761	51.2727	19.4015	56.5455	24.2089	62.4	20.359	59.6923	26.0012
179_m_m_h_a.jpg	a	middleaged	Male	32.7	18.9212	42.1667	20.4132	53.4545	22.4872	58	19.1485	60	22.2311	58.4545	21.4633
179_m_m_h_b.jpg	b	middleaged	Male	36.8182	19.364	39.0909	28.4164	50.1818	18.5624	52.9	26.9297	63.5	22.6495	50.3636	30.559
006_m_f_h_a.jpg	a	middleaged	Female	53.8	30.2501	74.6667	20.2903	68.0909	15.3327	77.2	22.3895	73.9	13.6744	69.9091	26.7225
006_m_f_h_b.jpg	b	middleaged	Female	68.6667	25.7164	70.7	32.745	71.0909	27.5879	76	22.222	72.6	15.7635	71.4167	18.258
011_m_f_h_a.jpg	a	middleaged	Female	31.1818	20.2624	56.6667	17.4425	47.5455	25.7502	56.1818	14.6821	56.7	25.8373	55.9091	29.7202
011_m_f_h_b.jpg	b	middleaged	Female	32.9167	18.6813	55.4	26.3827	52.2727	22.0231	59.6364	27.2186	66.0909	24.4232	55.9167	28.513
019_m_f_h_a.jpg	a	middleaged	Female	25.6364	20.9584	47.8333	25.2148	57.4545	21.0303	52.3	17.9013	58.4	19.9455	48.1818	22.8946
019_m_f_h_b.jpg	b	middleaged	Female	30.8333	23.1038	43.6	24.7665	39.9	18.3875	49	28.4675	61.3636	21.5233	47.1818	21.8212
029_m_f_h_a.jpg	a	middleaged	Female	32.1818	23.4598	50.3636	19.7802	53.4545	18.3595	53.8	23.1939	52.8	29.6753	46.7273	22.8346
029_m_f_h_b.jpg	b	middleaged	Female	34.0909	22.2461	47.0909	31.1013	50.6364	26.4434	54.5	27.3018	57.8	25.5595	50.6923	27.6296
035_m_f_h_a.jpg	a	middleaged	Female	22.5	19.8883	33.3333	13.2962	33.5	23.3024	41.6667	20.0811	51.7	28.6203	41.8333	25.7076
035_m_f_h_b.jpg	b	middleaged	Female	22.5833	20.4649	23.1	23.8395	26.4545	21.741	35.5	26.5141	44	26.2031	37	19.5169
043_m_f_h_a.jpg	a	middleaged	Female	19.5833	19.911	40.3636	16.9013	41.3333	24.6884	35.9	16.5156	46.1818	18.6162	49.7273	23.1952
043_m_f_h_b.jpg	b	middleaged	Female	22.8333	20.7226	36	29.1848	46.9091	25.7622	40.9	28.3292	60.8182	24.6082	56.3636	25.8584
050_m_f_h_a.jpg	a	middleaged	Female	23.3636	20.6895	43.5455	15.5007	55	14.4568	52.4	18.8927	56.2	23.4322	45.0909	15.8143
050_m_f_h_b.jpg	b	middleaged	Female	22.1667	19.8624	39.8	22.8318	38	24.9118	34.8182	23.6297	54.0909	27.9408	35.9167	23.7734
052_m_f_h_a.jpg	a	middleaged	Female	34.0909	25.8823	44.3	21.9041	50.5	23.5662	49.3	16.513	56.4444	26.3681	53.5385	23.4791
052_m_f_h_b.jpg	b	middleaged	Female	32.75	22.3205	36.5	27.0401	58.8	25.6463	53.3333	28.4967	67.9091	20.3492	52.5	18.7641
061_m_f_h_a.jpg	a	middleaged	Female	44.4545	28.5109	76	19.959	63.2727	16.8053	69.8	16.7319	68.1	13.1272	76.2727	22.5037
061_m_f_h_b.jpg	b	middleaged	Female	60.75	25.0785	67.4	27.2405	64.6667	25.2311	72.9091	22.5009	73.6667	13.0825	72.3	19.7937
064_m_f_h_a.jpg	a	middleaged	Female	34.1818	30.5051	56.8	14.7105	52.7273	14.833	52.6	11.5007	63	12.1198	54.1818	26.6751
064_m_f_h_b.jpg	b	middleaged	Female	30.4167	23.8307	48	28.0515	49.8333	21.599	63	19.509	70.8	12.7087	51.75	20.249
073_m_f_h_a.jpg	a	middleaged	Female	42.3	31.8993	66.6923	12.3988	63.5833	15.7276	69.2222	18.6867	59.7778	21.3938	54.5	25.9983
073_m_f_h_b.jpg	b	middleaged	Female	45.8333	26.7508	64.6	27.6735	69	25.1952	54.1818	26.5399	61.4545	20.1016	63.6667	24.5739
080_m_f_h_a.jpg	a	middleaged	Female	34.7692	22.2192	54.4545	17.9742	52.0833	21.2836	57.6667	18.1521	61.3	19.1256	48.5455	18.3704
080_m_f_h_b.jpg	b	middleaged	Female	36.6667	21.5336	51.6667	31.9922	54.1818	22.8946	55.6364	30.5917	65.6364	25.9934	56.3333	24.6441
084_m_f_h_a.jpg	a	middleaged	Female	20.5833	18.7445	38	19.0053	48.3333	15.0172	49.5	14.8118	54.5	19.603	60.0909	19.5676
084_m_f_h_b.jpg	b	middleaged	Female	37.75	20.7458	42.1111	33.2996	53.5455	16.3973	58.2727	23.3371	58.2727	20.0154	54.4167	23.8001
093_m_f_h_a.jpg	a	middleaged	Female	24.0769	16.1733	39.5	20.9669	38.5455	20.7382	38	23.3333	46.7273	20.1598	56.5455	24.6875
093_m_f_h_b.jpg	b	middleaged	Female	30.3333	20.1013	36.5	21.397	37.9167	24.7146	49.6	22.5053	54.3	24.4997	50.1538	27.5586
097_m_f_h_a.jpg	a	middleaged	Female	20.2727	20.7513	36.3333	18.7778	30.6667	24.681	43.3333	19.0591	46	25.556	39.9091	27.8764
097_m_f_h_b.jpg	b	middleaged	Female	29	21.473	44.1	21.9163	30.8182	20.2179	39.1818	24.1073	44	26.2298	44.9167	19.1713
103_m_f_h_a.jpg	a	middleaged	Female	38.0909	19.8769	43	19.9708	66.4545	16.5491	52.5	14.6306	55.9	22.9272	53.5	25.2389
103_m_f_h_b.jpg	b	middleaged	Female	28.8333	23.366	44.4	23.4625	51.7273	23.4482	59.9091	24.8614	64.0909	13.5237	50.0833	24.938
111_m_f_h_a.jpg	a	middleaged	Female	34.5833	34.5134	53.9	13.1356	56.0909	19.144	65	13.1233	55.7	21.7871	68.25	27.7067
111_m_f_h_b.jpg	b	middleaged	Female	40.5833	19.4303	51.5556	30.3896	55.6364	23.9594	61.3	20.2981	74.6667	16.0133	66.5455	23.9055
113_m_f_h_a.jpg	a	middleaged	Female	40	21.3307	62.0909	16.8075	60.9091	9.4388	65.8	22.9143	62.1	21.4499	66.5833	25.1485
113_m_f_h_b.jpg	b	middleaged	Female	37.0833	21.8485	57.3	33.8593	63.8182	24.8267	60.1667	25.8064	66.2727	18.1499	62.5	19.3461
117_m_f_h_a.jpg	a	middleaged	Female	51.75	21.3462	59.2727	26.8927	66.2727	20.5285	68.7273	19.3033	82.3636	12.7849	73.7273	25.9965
117_m_f_h_b.jpg	b	middleaged	Female	47	24.6761	44.6667	25.2735	61.5455	24.1676	59.25	32.4405	79.0909	12.1857	75.8333	20.7226
122_m_f_h_a.jpg	a	middleaged	Female	11.9	14.0432	43.8182	15.3611	50.5455	25.7347	37.9	16.7428	49.2	25.3412	36.4545	17.5918
122_m_f_h_b.jpg	b	middleaged	Female	30	20.0798	35	25.9654	39.9167	20.3535	51.2	30.568	60.3	25.1177	48.8462	25.8032
128_m_f_h_a.jpg	a	middleaged	Female	17.3333	15.441	41.0909	22.563	44.1667	21.4299	42.3	12.5791	54.4	22.8872	41.4545	29.6728
128_m_f_h_b.jpg	b	middleaged	Female	27.5	20.8915	39.6667	21.6968	45.0909	30.7098	40.1818	30.6882	54.8333	24.1466	42.0909	22.0248
138_m_f_h_a.jpg	a	middleaged	Female	20.9	17.8167	37.5833	19.0571	44.8182	14.7704	43.4	18.2647	47.9	29.0534	44.7273	18.7515
138_m_f_h_b.jpg	b	middleaged	Female	28.0833	16.6486	39	25.976	45.1818	20.8989	51	32.1714	52.5455	20.935	41.25	23.917
139_m_f_h_a.jpg	a	middleaged	Female	39.0833	24.0396	53.75	20.6183	61.1818	20.5076	60.4	32.6707	69.9	12.2787	67	26.1638
139_m_f_h_b.jpg	b	middleaged	Female	49.4167	28.8899	59.4	27.9213	55.4545	26.4362	69.9091	22.3493	78.9091	14.7544	70.5	18.7204
156_m_f_h_a.jpg	a	middleaged	Female	18.7	13.2585	37.1667	18.2848	35.7273	23.4311	41.9091	21.0022	49.6364	23.2175	48.8182	30.2087
156_m_f_h_b.jpg	b	middleaged	Female	29.5833	21.0647	30.2	28.2363	44.9091	24.6433	46.3636	28.5982	57	26.378	51.25	26.9448
157_m_f_h_a.jpg	a	middleaged	Female	40.3333	25.0394	59.8182	22.1667	55.6364	15.7815	63.1	20.0524	72.7	17.8079	66.8333	22.6147
157_m_f_h_b.jpg	b	middleaged	Female	45.6667	30.9526	53.3	29.4318	58.0909	26.7972	62.4545	24.7158	64.1	27.5336	68.1667	22.6348
168_m_f_h_a.jpg	a	middleaged	Female	21.1818	19.2864	40	18.1959	52.7273	21.9686	48.5	20.7753	55.6	22.297	53.4545	21.598
168_m_f_h_b.jpg	b	middleaged	Female	29.5833	20.8826	43.4	26.4835	54.5455	20.0966	50.4545	25.3076	60.9	23.0914	53.6923	19.3752
180_m_f_h_a.jpg	a	middleaged	Female	20	19.6525	40.6923	19.5763	44.25	12.736	47.1111	19.0358	40.5455	25.1967	52.9091	26.1092
180_m_f_h_b.jpg	b	middleaged	Female	27.4167	23.9904	44.9	29.614	40.6364	22.2048	46.3636	29.2516	50.6364	21.8141	47.1667	22.5462
004_o_m_h_a.jpg	a	older	Male	36.6667	26.3761	45.7273	27.6481	57.4167	14.2156	61.4444	19.3463	55.9	16.7958	53.3636	31.0235
004_o_m_h_b.jpg	b	older	Male	41	26.5594	46.4545	32.9708	48	26.397	52.0909	23.4668	69.25	16.6413	63.0909	16.616
015_o_m_h_a.jpg	a	older	Male	23.2727	21.6661	39	26.1638	46.3636	15.7941	38.7273	20.8715	54	24.5611	43.75	29.4776
015_o_m_h_b.jpg	b	older	Male	32.1667	26.4053	33.3	28.5348	36.0909	25.0378	47.9091	22.9585	53.2727	23.9211	40.0833	25.0434
018_o_m_h_a.jpg	a	older	Male	12.7273	12.5147	26.0909	19.4394	37.5455	25.8432	31.2	19.3379	44.5	23.2152	27.5833	19.7275
018_o_m_h_b.jpg	b	older	Male	28.3333	23.1805	32.5556	25.1103	29.6364	19.3818	42.7273	25.6011	54.6154	24.5409	36.5	30.3178
027_o_m_h_a.jpg	a	older	Male	26	22.3891	32.6364	19.5104	40.6667	19.0708	43	15.141	46.2	21.9788	34	24.3236
027_o_m_h_b.jpg	b	older	Male	27.9091	21.7553	36.5	29.171	40.3	23.1279	44.0909	26.9535	55.4545	19.2477	42.6364	18.7311
033_o_m_h_a.jpg	a	older	Male	34.3636	24.8043	42.0909	28.1299	48.5455	14.6107	55.2	16.1576	58.1111	21.2099	52	22.9228
033_o_m_h_b.jpg	b	older	Male	45.25	26.4751	33	21.4787	39.0833	20.7604	48.4	27.4922	59.1	20.0136	57	31.9033
039_o_m_h_a.jpg	a	older	Male	16.3	20.8702	33.8462	20.2355	40.7	19.0032	41	18.4095	52	26.3097	26.4545	17.5006
039_o_m_h_b.jpg	b	older	Male	29.0833	26.8513	36.3	20.2158	39.1818	25.1309	37.8182	25.1905	49.9091	18.8598	31.5833	22.585
042_o_m_h_a.jpg	a	older	Male	21.8333	21.0835	28.0909	18.9602	47.5455	13.7504	39	26.3481	46.4	26.0393	32.8333	22.5422
042_o_m_h_b.jpg	b	older	Male	21.8182	23.0643	22.6	21.402	34.7273	24.1995	30.5455	21.3746	52.75	22.7441	33.7273	23.5121
046_o_m_h_a.jpg	a	older	Male	14.5833	19.6629	27.3333	24.1899	37.5	23.5478	33.8182	19.5132	46.1818	27.0215	26.1818	17.7585
046_o_m_h_b.jpg	b	older	Male	17.7273	21.434	42.2727	26.5484	37.9	26.4804	42.4545	28.335	46.5	25.5832	31.6923	22.75
053_o_m_h_a.jpg	a	older	Male	24	20.5294	37.5	19.1667	42.4545	12.5169	39.0909	22.0747	52.1	21.9365	45.0909	25.8861
053_o_m_h_b.jpg	b	older	Male	28.0909	21.4591	38	24.7835	36.25	22.3856	35.1818	26.9289	60.1	25.6405	32	21.166
059_o_m_h_a.jpg	a	older	Male	26	25.3693	32.5455	16.3117	42.4545	15.1879	38.4545	22.2007	50.4	26.099	36.0909	27.0054
059_o_m_h_b.jpg	b	older	Male	25.8182	22.5247	40.4545	29.5444	33	19.5402	36.4	24.3091	49.1667	28.8502	43.7273	16.6318
065_o_m_h_a.jpg	a	older	Male	17.6	20.7322	32.5385	25.8702	44.5833	15.7102	39	17.2337	50.5556	24.3316	45.25	23.7147
065_o_m_h_b.jpg	b	older	Male	39.1667	28.0676	37.3	25.9103	37.6	19.5971	38.4167	27.7405	50.6364	21.9603	36.25	23.7185
074_o_m_h_a.jpg	a	older	Male	22.25	23.4254	22.5455	19.4544	44.4545	19.8513	35.7	20.9075	42.6	21.7215	19.2727	17.3614
074_o_m_h_b.jpg	b	older	Male	20.5833	21.7693	33.2	28.9782	26.5	19.0335	37	22.156	41.0909	26.0248	32.7273	34.8973
076_o_m_h_a.jpg	a	older	Male	26.4545	24.8329	33.1667	21.8042	36.4545	16.379	26.9	17.3682	47.6364	22.1281	30.2	17.0737
076_o_m_h_b.jpg	b	older	Male	23.3333	19.7592	27.2	22.5083	28.6667	22.4553	32.5	23.1337	50.4545	21.3933	26.5833	24.3999
083_o_m_h_a.jpg	a	older	Male	30.25	22.8717	36.5833	20.7735	46.8182	21.2735	36.2	16.4371	51.3333	24.2023	48.5	28.8649
083_o_m_h_b.jpg	b	older	Male	29.0833	22.0761	37.2222	22.8078	38.7273	21.9686	45.7273	27.2474	57.3	23.2954	39.5833	25.9911
091_o_m_h_a.jpg	a	older	Male	26.5833	26.435	34.7273	21.3639	39.6364	22.8835	48.9	15.7864	53.8	21.0491	47.7273	29.2099
091_o_m_h_b.jpg	b	older	Male	30.2727	18.3199	26.4	24.3502	32.0909	25.1573	46.9091	24.9778	61.7273	12.3458	51	28.7333
102_o_m_h_a.jpg	a	older	Male	34.1667	26.4191	37.1	22.4175	44.3636	11.8091	46.1	20.7549	50.1818	21.867	39.9091	18.6893
102_o_m_h_b.jpg	b	older	Male	35.5	25.1486	36.8889	27.2555	37.6	16.9391	47.9091	26.4441	52.4	21.3916	40.6667	22.8606
107_o_m_h_a.jpg	a	older	Male	13.8182	23.3445	22.8333	19.623	40.6667	26.1997	38.2222	22.4376	44.6	23.9453	25.2727	19.1107
107_o_m_h_b.jpg	b	older	Male	26	19.8449	30.3333	22.644	34.1667	22.1394	49.2	27.9714	47.3	18.2273	31.0909	24.8172
118_o_m_h_a.jpg	a	older	Male	23.3	24.3587	34	18.6304	38.9091	24.5335	32.7	12.6495	46.5455	23.6236	40.3636	24.2704
118_o_m_h_b.jpg	b	older	Male	25.4167	19.7643	38.1111	28.14	36.8182	24.4328	38.2727	27.6409	52.3	20.8276	43.5385	24.0438
121_o_m_h_a.jpg	a	older	Male	13.9091	15.5335	20	20.0699	34.4545	21.9698	20.8	17.7313	38.8889	20.8293	23	17.8682
121_o_m_h_b.jpg	b	older	Male	19.0909	17.4897	27.5455	17.9241	29.1667	25.5408	36.1818	26.914	45.6364	21.6946	26.6923	23.3073
131_o_m_h_a.jpg	a	older	Male	28.3636	25.3664	25.9091	22.823	37	23.2078	46.1	18.5739	50.4444	27.6184	33	20.3872
131_o_m_h_b.jpg	b	older	Male	27.75	21.747	32.2	28.256	33.9091	17.1549	49.4545	27.6599	49.3636	20.5974	40.25	25.7086
137_o_m_h_a.jpg	a	older	Male	22.7273	22.6367	27.8182	17.5375	40.2308	21.2099	49	21.314	50.3	19.4196	40.4545	17.5406
137_o_m_h_b.jpg	b	older	Male	29.1667	18.6637	35.2222	20.2841	39.5	20.2237	40.4	23.7122	59.8182	23.6593	45.6667	26.3243
141_o_m_h_a.jpg	a	older	Male	19.5833	22.2034	28.5455	27.7358	48.5455	28.4758	30.8	15.9011	44.2727	23.0004	25.3636	20.6023
141_o_m_h_b.jpg	b	older	Male	21.2727	22.0186	25.2	23.5976	25.6364	22.3842	36.1667	26.2292	45	26.2336	36.25	25.4241
146_o_m_h_a.jpg	a	older	Male	23.6364	19.3043	34.1667	29.7561	43.7273	21.157	41.6	25.4349	44.3636	25.9202	33.0909	18.8704
146_o_m_h_b.jpg	b	older	Male	35.5833	30.9793	40	21.9596	42.0909	16.8015	39.1818	24.3714	55.8182	17.8707	36	22.8791
151_o_m_h_a.jpg	a	older	Male	29.5455	23.8888	29	22.8155	39.1818	20.9085	37.6	16.0083	45.9	22.9756	28.3636	19.2316
151_o_m_h_b.jpg	b	older	Male	25.25	21.2736	32.8889	24.4359	36.6667	24.0807	40.0909	24.1431	56.2	27.7521	36.75	18.6554
161_o_m_h_a.jpg	a	older	Male	14.6	18.6679	27.25	20.7589	37.9167	21.4071	38.1111	16.729	51.9	27.8227	30.1818	23.6847
161_o_m_h_b.jpg	b	older	Male	24.5	22.4803	25	17.224	33.3636	24.3198	35	24.2528	49.4545	24.6956	33.25	25.5347
166_o_m_h_a.jpg	a	older	Male	34.3077	19.3709	42.9091	26.2391	48.9091	19.8769	55.6	20.6624	55	22.1766	46.3	28.0755
166_o_m_h_b.jpg	b	older	Male	41	30.766	42.9	26.2232	47	25.1078	48.3636	27.3323	60.2727	23.0438	46.0833	25.8332
172_o_m_h_a.jpg	a	older	Male	22.5455	20.627	32.3	24.9045	39	19.5908	35.8	30.147	42.4	23.6465	29.2727	29.5536
172_o_m_h_b.jpg	b	older	Male	20.9091	21.2248	25.2727	18.9952	30.4545	24.4514	30.9167	21.305	41.7	26.4745	30.8333	25.0557
176_o_m_h_a.jpg	a	older	Male	20.3636	20.1855	29.9167	19.9566	38.7273	21.0004	39.9091	17.2189	51.1	23.0384	32.8182	24.3632
176_o_m_h_b.jpg	b	older	Male	30.6667	24.4404	35.6	20.1726	31.1818	17.4231	43.6364	23.5935	49.2	21.5035	32.5	23.3413
005_o_f_h_a.jpg	a	older	Female	18.3636	15.9077	38.6923	23.2679	39.6364	16.925	50.7273	12.362	47.1	34.3493	33.8333	23.9653
005_o_f_h_b.jpg	b	older	Female	27.4167	20.1515	38.8889	29.0192	39.9091	22.941	42.9091	27.5843	47.9	21.3096	42.25	21.4651
012_o_f_h_a.jpg	a	older	Female	20.4545	21.718	57.0833	19.247	48.9091	20.7868	55.2727	18.3689	47.2	35.2571	47.2727	17.8275
012_o_f_h_b.jpg	b	older	Female	33.8333	19.5766	32	27.4089	44	16.4317	49.2	33.6973	60.5	23.5808	53.3077	19.3924
021_o_f_h_a.jpg	a	older	Female	31.9231	24.6152	55.1	24.6236	52.3636	17.4773	61.6	16.0914	57.3	21.0927	50.2727	23.9336
021_o_f_h_b.jpg	b	older	Female	35.3333	25.2778	45.3	23.4286	42.1667	15.3672	55	28.3584	67.5455	12.4207	49.4167	19.7183
024_o_f_h_a.jpg	a	older	Female	14.6364	12.979	36.5	20.8087	40	15.6716	40.4	18.4944	50.2	26.8858	53.4545	23.9139
024_o_f_h_b.jpg	b	older	Female	25.75	21.4397	38	23.5938	37.6364	21.9694	35.1818	24.2397	51.3636	17.3394	35.25	23.634
030_o_f_h_a.jpg	a	older	Female	37.4	26.2264	62.5	19.6723	55.75	12.9343	65.1111	19.6242	60.1818	19.5746	56.2	27.5431
030_o_f_h_b.jpg	b	older	Female	33.4545	21.1015	57.8	27.6639	54.4545	23.7123	49.2727	29.8063	65.7273	16.8706	57.3333	23.364
036_o_f_h_a.jpg	a	older	Female	17.25	15.7372	45	21.0026	48.8182	20.2476	49.6	18.5604	46.4	20.7107	40.75	26.4064
036_o_f_h_b.jpg	b	older	Female	26.9167	21.3135	36	27.1457	33.5833	16.4839	47.6	23.4151	51.1	20.8617	37.5385	25.2178
044_o_f_h_a.jpg	a	older	Female	12	11.9931	26.6	20.6301	38.6	19.3402	35.4545	19.4081	55.3	25.2765	44.6364	21.2992
044_o_f_h_b.jpg	b	older	Female	17.3636	16.848	19.5455	17.5634	29.7273	20.4504	39.2727	18.879	53	22.0101	37.4167	25.2063
047_o_f_h_a.jpg	a	older	Female	28.7273	26.2948	39.1818	27.8238	48.75	19.2171	47.7778	7.10243	55.8	26.7324	39	26.2852
047_o_f_h_b.jpg	b	older	Female	36.9091	21.5288	47.7273	26.5484	43.2727	23.7364	59.3636	25.2479	61.2727	27.4157	50.6667	22.9241
055_o_f_h_a.jpg	a	older	Female	10.2	10.1959	43.1538	17.339	41.5833	23.1888	40.6667	16.6508	50.2727	21.1853	51.2727	21.8041
055_o_f_h_b.jpg	b	older	Female	26.6364	21.782	33	27.8089	36.4167	21.2152	44.2	21.7807	51.7273	26.2415	42.1818	30.4231
060_o_f_h_a.jpg	a	older	Female	15.9167	16.8548	39.5455	16.5733	45.0909	10.9403	38.5	20.4844	48.2222	22.5321	32.8333	17.246
060_o_f_h_b.jpg	b	older	Female	24.1818	20.8845	44.1818	25.7325	34.7273	27.3097	37.5455	30.0911	51.5	21.7575	38.4167	20.237
067_o_f_h_a.jpg	a	older	Female	28.3636	26.2003	52.9091	22.2147	55.6667	18.7293	62.4444	18.4059	56.9	23.9	44.5455	23.2653
067_o_f_h_b.jpg	b	older	Female	28.9167	24.4892	36.3333	28.5701	38.4545	17.9073	46.1818	28.2766	67.1	12.7928	55.25	24.2304
075_o_f_h_a.jpg	a	older	Female	30.8333	25.5835	52.75	20.6271	49.3636	14.1299	50.7	19.9892	51.7	16.4725	46.8333	30.2139
075_o_f_h_b.jpg	b	older	Female	22.2727	21.4667	41.9091	24.2217	35.6364	17.0545	48.1818	21.2218	50.4	14.5006	50	23.4521
079_o_f_h_a.jpg	a	older	Female	23.3333	22.7809	41.6364	22.708	43.5	20.6948	46.5556	16.9566	51.0909	23.7169	39.6	25.1184
079_o_f_h_b.jpg	b	older	Female	26.5	23.9374	43.1	22.5016	34.5833	15.8198	44.9091	22.7044	56.3636	24.6628	44.4167	26.8513
086_o_f_h_a.jpg	a	older	Female	20.9167	22.7375	46	24.8193	53.2727	16.8231	46.1	26.8802	50.2	25.4681	37.4545	26.0859
086_o_f_h_b.jpg	b	older	Female	35	25.7647	35.6667	25.632	41.1818	26.3166	54.0909	23.7716	48.2	30.958	47.75	22.9906
088_o_f_h_a.jpg	a	older	Female	19.0909	29.7841	39.6667	26.2863	42.1818	28.6455	47.0909	18.3164	42.3636	23.1312	29.6364	33.4881
088_o_f_h_b.jpg	b	older	Female	26.8182	31.5399	33.4545	27.3143	32.5833	19.1095	36.4545	32.1072	47	24.2037	15.8182	21.3533
096_o_f_h_a.jpg	a	older	Female	20.4545	18.7743	51.1667	23.7174	48.0833	22.5609	58.5556	24.239	51.8	23.715	47.3636	29.3471
096_o_f_h_b.jpg	b	older	Female	29.4545	23.5132	59.9	31.3527	46.4615	17.3571	51.2222	29.3376	62.6667	16.3726	51.7273	29.3227
100_o_f_h_a.jpg	a	older	Female	25.4545	24.9975	50	21.4321	43.7273	15.5441	49.4	18.9573	51.1	20.218	40.8333	27.3457
100_o_f_h_b.jpg	b	older	Female	26.4545	21.4726	41.9091	26.786	35.5833	18.2082	32.9091	28.3459	56.6364	21.1531	37.4167	25.368
110_o_f_h_a.jpg	a	older	Female	16.9167	19.3224	35.6	19.4491	42.0833	21.475	31	16.9263	47.6364	23.2778	28.0909	29.1769
110_o_f_h_b.jpg	b	older	Female	25.25	20.7895	32.3333	23.1301	31.9091	22.5187	38.1667	26.243	46.0909	28.1121	31	26.4059
112_o_f_h_a.jpg	a	older	Female	20.3636	29.5915	38.7273	21.7536	42.4167	22.6694	43.2222	25.1136	44	25.6038	46.8182	27.8418
112_o_f_h_b.jpg	b	older	Female	29.25	27.8768	43.4444	28.3069	29	15.6333	36.9091	24.8494	51.9091	27.8009	33.8333	23.3543
120_o_f_h_a.jpg	a	older	Female	28.25	28.2461	49.4545	19.3926	42.5	16.7481	47.2727	22.1589	57.1	23.2687	45.8182	27.7302
120_o_f_h_b.jpg	b	older	Female	30.1667	25.9819	46.8	29.0547	37	18.4065	41.9167	30.7821	59.1667	22.1188	34.6364	20.81
124_o_f_h_a.jpg	a	older	Female	18.6154	19.2853	38.3636	22.6639	46.3636	23.6824	47.8	25.8061	49	28.5735	34.9167	19.1902
124_o_f_h_b.jpg	b	older	Female	29.9091	23.3771	45	30.1861	42.7273	25.846	47.0909	24.1556	54.8182	20.1386	49.75	28.7785
130_o_f_h_a.jpg	a	older	Female	13.8	13.9507	24.25	17.3631	27	27.0824	36.4	14.4699	45.4	21.3864	28.9091	24.1307
130_o_f_h_b.jpg	b	older	Female	23.1667	19.2393	29.4	25.1449	26.0909	21.993	31.3636	26.8934	46.7273	23.4269	29.6667	23.5925
133_o_f_h_a.jpg	a	older	Female	21.8333	20.1893	46.4545	18.9598	51.0909	17.0379	56.8	15.9638	51.5	27.314	54.1818	20.292
133_o_f_h_b.jpg	b	older	Female	31.3333	21.4956	36.1	26.5516	44.6364	21.901	43.3	28.6436	56	20.8423	52.4167	28.35
143_o_f_h_a.jpg	a	older	Female	24.2727	20.6741	53.0833	25.5359	42.5833	26.8885	49.3333	23.622	47.8	24.0823	40.9091	27.4534
143_o_f_h_b.jpg	b	older	Female	27.6667	19.4297	43	23.2188	34.0909	24.2341	49.4545	26.151	52.1	23.1442	46	21.6526
148_o_f_h_a.jpg	a	older	Female	16.8	16.5113	33.9167	22.0967	38.2727	18.7408	40.2	14.7859	47	27.3821	39.0909	28.8979
148_o_f_h_b.jpg	b	older	Female	19.3333	19.3359	36.7	23.8749	28.9167	20.5225	37.6	26.2221	39.1667	22.735	37.1818	19.6714
154_o_f_h_a.jpg	a	older	Female	19.6667	23.8607	32.3636	22.1868	48.1667	20.0854	39.1111	19.3226	40.6	25.4043	33.75	26.5231
154_o_f_h_b.jpg	b	older	Female	23.8333	21.8916	33	24.2212	36.2727	24.3068	41.4545	19.7604	44.5455	23.019	29.8182	24.0907
158_o_f_h_a.jpg	a	older	Female	25.2727	22.4459	44.5833	16.0819	44.0909	22.2596	40.8182	18.7073	58.5	20.6142	40.3333	29.3887
158_o_f_h_b.jpg	b	older	Female	25.5833	23.0709	41.8	25.8749	37	18.6387	45.3636	25.5197	44	27.0998	36.5	21.0043
164_o_f_h_a.jpg	a	older	Female	11	13.4164	30.5	23.8956	35.1	16.8355	45.3636	14.3407	48.5455	24.2255	43.0909	24.623
164_o_f_h_b.jpg	b	older	Female	26.6667	18.9081	34.7	23.7629	40	17.4642	41	24.0375	53.5455	12.2667	30.6364	17.8285
174_o_f_h_a.jpg	a	older	Female	15.4545	19.9417	27.8333	23.6598	38.0909	16.9083	39.8	16.7849	46	28.0278	35.4167	26.5962
174_o_f_h_b.jpg	b	older	Female	20.6667	19.1659	29.5	25.9197	34.1818	19.7475	37.5833	24.5003	49.3636	25.4215	43.3636	23.2089

## Sheet: attr_sad
Picture	Set	Face Age	Face Gender	Mean_YM_attr	SD_YM_attr	Mean_YF_attr	SD_YF_attr	Mean_MM_attr	SD_MM_attr	Mean_MF_attr	SD_MF_attr	Mean_OM_attr	SD_OM_attr	Mean_OF_attr	SD_OF_attr
008_y_m_s_a.jpg	a	young	Male	23.2727	19.4118	33.1818	23.7311	38.6667	23.1215	36.6667	19.5768	51.2222	24.3093	56.6667	25.9627
008_y_m_s_b.jpg	b	young	Male	36.0833	24.3066	21.6667	18.5405	46	19.776	38.9	20.2619	56.8333	24.4348	42.5	33.4759
013_y_m_s_a.jpg	a	young	Male	21.25	21.3249	34.7273	17.2052	42.1818	21.1604	41.8	20.991	54.7273	21.5875	48.7273	30.401
013_y_m_s_b.jpg	b	young	Male	27.1667	23.025	32.2	30.4259	49	11.3754	39.0909	25.4576	51.1	14.1771	42.0769	22.3475
016_y_m_s_a.jpg	a	young	Male	22.5455	25.0414	50.75	23.0262	51.6667	25.5711	43.1111	14.624	51	19.2642	45.9091	26.2658
016_y_m_s_b.jpg	b	young	Male	35.1667	26.9944	35.2222	24.4427	55.9091	12.3811	39.0909	18.4307	55	14.3597	38.75	20.0958
025_y_m_s_a.jpg	a	young	Male	17	18.9326	31.75	21.1236	33.7273	14.6294	34.3	20.3473	46.6667	23.796	56.9167	22.5971
025_y_m_s_b.jpg	b	young	Male	24.5455	24.9374	14.3636	15.1279	37.8333	16.0841	22.2	19.6458	42.9091	25.9864	34.6364	21.1767
031_y_m_s_a.jpg	a	young	Male	25.8182	27.9135	46.6364	25.1645	45.5455	21.6673	37.2	26.9889	45.5	26.8173	38.3636	21.4302
031_y_m_s_b.jpg	b	young	Male	35.9167	27.0503	41.5	31.5991	51.0909	12.3325	32.6364	17.1888	51.3636	19.7194	39.1818	22.3196
037_y_m_s_a.jpg	a	young	Male	13.6	14.128	40.25	24.7207	44.0833	22.9722	43.3333	19.0132	45.4	24.6044	49.9091	26.6738
037_y_m_s_b.jpg	b	young	Male	24.8333	24.6128	25.1111	20.4722	39	16.2481	24.3636	17.6764	32.1	22.348	25.1538	17.2523
041_y_m_s_a.jpg	a	young	Male	19.8182	18.5516	50.6154	22.2581	51.3636	20.6023	43.8	20.4928	56.9	17.4193	50.8182	27.0067
041_y_m_s_b.jpg	b	young	Male	42	22.8195	43.4444	28.5837	63.1818	19.8988	53.7273	25.8615	69.7273	16.1499	62.6364	24.4142
049_y_m_s_a.jpg	a	young	Male	15.7273	19.5606	37.0833	25.9841	36.1667	23.8626	38.1	19.9302	46.3	24.1893	36.1667	25.2796
049_y_m_s_b.jpg	b	young	Male	33.0833	23.4073	25.4	21.6651	52.7	18.661	27.1818	19.5132	41.0833	25.914	27.6364	19.1221
057_y_m_s_a.jpg	a	young	Male	19.0909	21.8561	44.3636	22.4155	41.5455	14.8685	40	18.2209	48.1818	20.3608	56.3636	27.0047
057_y_m_s_b.jpg	b	young	Male	35.25	26.3581	38.8	30.3564	41.0833	18.3969	32.5455	17.6882	45.6364	22.8485	41.0833	29.5157
062_y_m_s_a.jpg	a	young	Male	17.2727	15.2059	52	29.9333	38.9091	23.1623	36.8	17.0802	53.1111	23.4171	45.25	18.6456
062_y_m_s_b.jpg	b	young	Male	35.5455	23.097	35.0909	23.2786	42	16.4864	31.2727	18.0172	53.2	22.6853	36.9167	25.0761
066_y_m_s_a.jpg	a	young	Male	30.0909	21.6493	44.0833	25.1087	41.6667	19.411	43.3333	22.8145	52.1	24.159	53	27.8388
066_y_m_s_b.jpg	b	young	Male	32.8333	26.2153	28.8	28.252	51.7273	13.5506	35.3636	22.6198	58.4545	16.1948	41.5	21.1682
072_y_m_s_a.jpg	a	young	Male	13.1	18.5559	45.9231	22.4442	53.2727	16.6799	42	20.7096	47.4	23.9963	54.5	32.2363
072_y_m_s_b.jpg	b	young	Male	36.8333	26.4191	39.6	31.0956	50	26.6458	31.4545	22.7304	49.7	21.0716	45.0833	26.5791
081_y_m_s_a.jpg	a	young	Male	13	16.3768	50.9091	21.7415	36	21.2932	29.1	15.264	44.1	20.9839	28.7273	19.0688
081_y_m_s_b.jpg	b	young	Male	28.8333	22.3966	36.2	19.0193	36.1818	19.3485	20.0909	15.8963	30.8182	19.2708	12.1667	15.2782
089_y_m_s_a.jpg	a	young	Male	21.5455	18.2667	56.2727	27.9324	44.8182	20.9658	46.7	23.4523	51.1	16.2306	49	27.416
089_y_m_s_b.jpg	b	young	Male	44.75	18.5282	46.4444	31.5084	58.3636	18.5541	39.3636	22.0784	48.6	14.2766	36.6923	22.0922
099_y_m_s_a.jpg	a	young	Male	25.2	21.3791	43.3333	20.7335	48.1818	23.1077	51.8	17.9121	54.1	25.0575	51.4545	24.6388
099_y_m_s_b.jpg	b	young	Male	34.4167	23.7313	30	27.8568	50.0909	18.5443	30.6364	18.3427	54.3	22.341	40	21.4857
105_y_m_s_a.jpg	a	young	Male	25.3333	20.8341	34.4167	20.9912	37	19.225	41.7	17.4295	49.1	23.9836	42.0909	18.2453
105_y_m_s_b.jpg	b	young	Male	31.7273	26.3556	29.2	22.8318	35.6364	16.8242	22	20.938	38.7273	22.4904	29.5	21.2196
109_y_m_s_a.jpg	a	young	Male	17.0833	20.0973	43.25	25.5383	35.4167	21.4877	39.4444	24.3624	52.3636	20.7088	44.3636	28.7725
109_y_m_s_b.jpg	b	young	Male	33.5833	24.2129	29.4	33.0495	45.2727	17.321	32.7273	20.5528	48.1667	17.8368	41.2727	19.688
114_y_m_s_a.jpg	a	young	Male	16.7273	17.8218	26.1818	27.1876	40.6364	17.9347	39.5	13.193	43.5556	19.1122	47.0833	22.7295
114_y_m_s_b.jpg	b	young	Male	28.9167	20.0475	34.3	32.6634	39.9091	22.4252	26.6	23.1814	44.0833	25.2387	30.2727	25.6908
119_y_m_s_a.jpg	a	young	Male	22.8	20.8689	49.3333	23.6656	41.8182	23.853	44.7	20.2268	50.0909	23.6451	39.2727	22.4593
119_y_m_s_b.jpg	b	young	Male	37	26.9815	32.6667	28.3373	44.0769	23.2001	23.2	19.3609	47.1818	29.3899	33.6667	25.681
123_y_m_s_a.jpg	a	young	Male	16	15.5492	51.4615	22.8714	43.4545	18.3105	45.4	22.4014	52.3	24.1525	46.7273	35.5249
123_y_m_s_b.jpg	b	young	Male	40.5	25.3072	29.5	23.6655	48.3636	6.85963	38	18.6226	59.3636	22.3798	40.4545	23.1835
127_y_m_s_a.jpg	a	young	Male	32.9091	26.6925	46.9167	26.6167	58.3636	21.4116	45.4	22.5152	51.3	23.833	47.6667	26.8102
127_y_m_s_b.jpg	b	young	Male	37.4167	22.6373	38.1	25.8863	43.6667	21.2103	43.1	21.8604	57.4	17.8089	38.0769	20.11
135_y_m_s_a.jpg	a	young	Male	12.6667	15.5232	26.0909	20.413	42.25	23.1757	32.5556	14.9843	46.4	24.4322	29.8333	21.7207
135_y_m_s_b.jpg	b	young	Male	22.4167	24.3066	26.3333	25.8457	41.0909	22.8274	19	16.3401	45.8182	23.4428	26.9091	22.2147
144_y_m_s_a.jpg	a	young	Male	28.9167	24.0811	56	26.4953	37.1818	21.3111	36.0909	17.5411	46.1	24.6867	46.4545	26.4664
144_y_m_s_b.jpg	b	young	Male	41.8333	26.8255	58.1	28.085	55.5455	16.8604	36.6364	21.0203	52.3636	25.2874	44.4167	24.978
147_y_m_s_a.jpg	a	young	Male	26.5	25.858	53.5455	21.4959	48.5833	17.9213	46.7	19.8944	57.3	20.5969	50.75	25.3991
147_y_m_s_b.jpg	b	young	Male	40.9167	21.8568	34.8	20.7139	48.6667	11.7499	33.3	24.065	56.6364	12.979	45.1667	27.3889
153_y_m_s_a.jpg	a	young	Male	19.8333	20.7182	50.8	28.662	37.4545	19.6538	37.5	20.4138	45.2	25.0723	41.1667	18.4333
153_y_m_s_b.jpg	b	young	Male	34.6667	26.7253	28.1111	26.3128	39.6364	17.9626	23.7273	18.7515	51.6	22.6431	29.6667	17.8495
160_y_m_s_a.jpg	a	young	Male	22.8333	18.0345	28.7273	22.9438	42.5455	23.492	44.4	17.4878	54.1	20.5451	56.6667	22.252
160_y_m_s_b.jpg	b	young	Male	26.6364	23.5341	24.0909	28.7174	37.3636	20.5342	24.7	18.6014	43.5	18.2163	32.4167	19.2706
167_y_m_s_a.jpg	a	young	Male	15.8333	17.2513	34.9091	25.1573	40.6364	17.7216	33.5	16.6015	47.5556	24.2853	38.8333	23.9121
167_y_m_s_b.jpg	b	young	Male	25.9167	23.8383	25.7	21.0716	33.75	18.3804	21.2	15.9847	43.3636	19.5206	21.8182	16.0986
170_y_m_s_a.jpg	a	young	Male	24.0909	18.6733	33	27.0891	38.9091	20.1864	37.7	19.8833	45.7	19.9056	31.3333	23.1961
170_y_m_s_b.jpg	b	young	Male	30.2727	24.654	34.7	29.9372	41	15.5563	21.3636	16.2374	36.5455	20.8919	26.25	20.1996
175_y_m_s_a.jpg	a	young	Male	28.75	19.0173	60.0909	27.9014	44.5833	25.6106	46.7778	21.8619	52	19.2527	58.3636	28.5492
175_y_m_s_b.jpg	b	young	Male	37.0833	25.7804	46	24.8998	47.6667	18.032	37.1	20.6798	58.1818	18.4218	43.8333	25.9924
010_y_f_s_a.jpg	a	young	Female	35.3636	16.5606	59.8182	24.5349	47.8333	23.4514	43	23.2755	53.6	23.6934	43.1667	29.7897
010_y_f_s_b.jpg	b	young	Female	24.6364	25.7731	36.9	23.3402	41.3636	28.1612	28.4545	21.2196	45	23.5844	32	24.4704
020_y_f_s_a.jpg	a	young	Female	54.5	22.5328	57.3636	18.1233	58.3636	18.2662	59.6	21.7164	65.8	18.5281	51.1667	25.139
020_y_f_s_b.jpg	b	young	Female	48.9167	22.1173	36.3	27.7891	49.6154	26.2219	34.5556	23.319	57.9	23.3164	39	21.8341
022_y_f_s_a.jpg	a	young	Female	47.4545	26.8118	59.2727	21.0052	55.3636	17.6481	52	21.6076	64.7273	22.9482	52.6364	24.5816
022_y_f_s_b.jpg	b	young	Female	49.5455	24.1262	41.1818	27.1618	47.3636	21.6438	52.9091	19.7305	58.7	25.0069	49.1667	17.0978
028_y_f_s_a.jpg	a	young	Female	29.5455	22.2322	50.5833	22.0761	48.0909	24.1597	52.8	22.597	56.9	20.5072	49.7273	20.6838
028_y_f_s_b.jpg	b	young	Female	36.5	23.9298	47.7778	26.1284	43.7273	24.9964	38.0909	23.931	51.1818	21.1982	46.25	23.0774
034_y_f_s_a.jpg	a	young	Female	21.1818	19.5029	48.0833	19.7321	35.0909	21.6447	43.6	26.1457	50.4545	23.5303	42.7273	18.8419
034_y_f_s_b.jpg	b	young	Female	24.1667	23.8092	29.8889	27.5202	36.5455	25.3746	25.5	20.7167	40.6364	23.6189	20.75	20.0142
040_y_f_s_a.jpg	a	young	Female	62.75	26.8095	66.6667	16.5877	56.1	29.1603	62.5	23.7353	61	19.3391	47.1818	18.4001
040_y_f_s_b.jpg	b	young	Female	72.8182	17.2558	52.1	30.8849	57.6364	27.9259	44.0833	14.4503	66.5	18.5188	51.3846	19.797
048_y_f_s_a.jpg	a	young	Female	48.8333	22.6909	69.2727	17.4074	57.2727	17.7262	54.1818	20.4735	54.8	26.9106	56.7273	21.5967
048_y_f_s_b.jpg	b	young	Female	61.2727	23.6985	55.5455	31.2358	62	26.2886	52.1	27.978	55.8182	12.7657	49.5455	24.1676
054_y_f_s_a.jpg	a	young	Female	53.2727	28.2634	64.3636	22.6021	53.5	24.6779	49.7778	29.878	61.5	24.573	55.4545	30.2865
054_y_f_s_b.jpg	b	young	Female	50.4167	29.6846	39.2	26.5447	49.8182	22.5691	34.7273	17.024	47.3	18.7442	32.4167	19.176
063_y_f_s_a.jpg	a	young	Female	33.4545	15.8137	44.8462	18.2932	51.9167	15.837	41.4444	25.4515	50.4	20.3317	59.1818	23.1509
063_y_f_s_b.jpg	b	young	Female	38.2727	25.5346	34	26.8216	48.6923	27.6749	30.4444	17.5079	51.9091	27.2267	32.8333	22.6629
069_y_f_s_a.jpg	a	young	Female	49.4615	30.8427	64.7	21.0399	68.7273	22.1995	64.4545	19.3099	61.1	17.4385	55.9091	26.3835
069_y_f_s_b.jpg	b	young	Female	54.8333	17.8368	56.2	28.2717	62.1667	25.139	42.4	21.66	61.25	25.0277	33.7273	28.4749
071_y_f_s_a.jpg	a	young	Female	49.25	23.3087	51.5833	18.9183	48.1818	22.0718	48.4	22.7704	52.6364	24.7721	53.0909	27.0128
071_y_f_s_b.jpg	b	young	Female	33	28.5657	36.7	25.3336	46.2727	19.8851	31.0909	21.1634	44	24.4222	38.2308	24.1735
085_y_f_s_a.jpg	a	young	Female	28.1667	19.1161	42.6667	24.0353	41.8182	29.8691	46.1818	18.5678	51.3	18.0558	45.0833	25.4896
085_y_f_s_b.jpg	b	young	Female	28.8333	25.4124	32	19.6299	46.8182	21.5352	34.1818	25.4591	56.5	23.0316	38.5455	23.0927
090_y_f_s_a.jpg	a	young	Female	54.8	17.9555	60.6667	21.3769	59.1818	19.0043	57.0909	23.9101	49.5	25.2201	67.9091	22.8406
090_y_f_s_b.jpg	b	young	Female	49.4	27.0851	46.1818	25.8295	57.5455	24.1303	35.6667	24.2312	58.3636	22.8485	37.75	19.6058
098_y_f_s_a.jpg	a	young	Female	57.2727	23.3756	79.6364	15.1279	51.8333	16.5465	49.8889	27.136	56.2	23.2704	64.9091	26.8382
098_y_f_s_b.jpg	b	young	Female	55.6667	18.8599	54.5556	25.4269	50.9091	29.443	43.7273	17.956	50.6	16.2152	37.9167	29.4108
101_y_f_s_a.jpg	a	young	Female	35.1	18.2845	57.5	19.5099	48.8333	19.6923	43.8889	31.0703	52.6667	22.1923	48.5	23.2985
101_y_f_s_b.jpg	b	young	Female	47.25	22.9233	42.9	31.8903	49.1818	21.7615	40.1818	20.634	46.5455	26.0052	35.4167	26.4763
106_y_f_s_a.jpg	a	young	Female	51.9091	24.4395	60.3333	23.2588	59.8182	15.0985	55.3	15.8538	60	20.9284	60.2727	28.228
106_y_f_s_b.jpg	b	young	Female	63.25	23.6148	41.7778	30.7155	64.8182	19.8687	38.3636	21.8416	57.9091	21.7874	53.75	27.2634
115_y_f_s_a.jpg	a	young	Female	61.75	22.05	70.0909	13.5901	54.2727	12.7522	58.3	22.2264	60.9	21.6818	63.3636	24.4429
115_y_f_s_b.jpg	b	young	Female	71.6667	19.5045	58.3	32.677	57.0909	21.7138	47.6364	25.5236	60.5	20.5625	44.6	23.7168
125_y_f_s_a.jpg	a	young	Female	22.9091	22.9279	39.7273	13.5506	37.9091	18.3927	44.6	13.9778	55.1	22.5657	47.4545	26.6809
125_y_f_s_b.jpg	b	young	Female	29.9167	25.0434	33	23.9531	46.8182	24.9272	32.1818	23.9826	56.5	25.9112	39.1667	21.0014
132_y_f_s_a.jpg	a	young	Female	33.4167	21.6184	48.7273	12.7991	47.4545	15.1879	43.2222	20.2038	55	22.156	52.8333	27.199
132_y_f_s_b.jpg	b	young	Female	35.6364	23.5469	45.4545	32.4788	53.8182	22.9513	30.0909	20.0422	56.8	21.8469	41.0769	28.6108
134_y_f_s_a.jpg	a	young	Female	57.1538	20.0784	55.1818	14.7433	60.5833	16.4065	53.2222	17.9358	60.6	25.4916	57.8182	28.5441
134_y_f_s_b.jpg	b	young	Female	40.3636	31.2994	48.5455	22.4025	55	26.937	33.7273	19.1525	50.7273	22.9917	40.4167	27.3411
140_y_f_s_a.jpg	a	young	Female	35.1818	32.2485	63.1667	21.1223	48.1818	22.538	57.0909	21.8653	56.8	23.3324	44.5455	23.918
140_y_f_s_b.jpg	b	young	Female	52.9167	24.567	52.6667	32.249	56.5	24.4968	41.4	26.7216	48.9	26.9215	33.8333	28.2484
150_y_f_s_a.jpg	a	young	Female	55.9091	23.9477	55.4545	15.0424	59.1818	25.3133	47.7	16.7799	60.4545	18.5168	59.1	28.9615
150_y_f_s_b.jpg	b	young	Female	55.75	26.0842	43.1111	24.6092	55.2727	27.4084	36.8182	14.8783	54	21.5453	41.25	26.4785
152_y_f_s_a.jpg	a	young	Female	64.6364	25.7343	57.5455	17.4835	61.8333	15.6892	55.1111	24.1322	63.5	21.7371	55.4545	24.2048
152_y_f_s_b.jpg	b	young	Female	73.3636	13.6987	61.3	26.7459	63.5455	16.133	47.7	16.627	71	10.03	48	23.3324
162_y_f_s_a.jpg	a	young	Female	30.7273	28.0681	44.3636	18.4839	55.2727	15.6019	48.8	15.157	63.1	22.0225	41.0909	25.4065
162_y_f_s_b.jpg	b	young	Female	43.3333	23.0428	40.1	25.2826	47	25.3664	29.0909	19.8265	45.6667	22.6689	26.6667	21.8521
163_y_f_s_a.jpg	a	young	Female	40.9091	32.4606	60	24.2525	54.3	20.6239	57.7273	23.6012	57.9	23.0239	51.5455	30.0512
163_y_f_s_b.jpg	b	young	Female	39.3333	24.4961	45.4	34.5742	47.25	25.5276	31.9	21.3877	47.6	17.8587	40.4167	24.5892
171_y_f_s_a.jpg	a	young	Female	28.1818	25.7869	49.8333	21.7667	49.4167	21.6226	57.8	20.2034	52.5	27.2815	41.0833	20.8608
171_y_f_s_b.jpg	b	young	Female	39.3333	24.7913	36.6667	27.5953	49.5833	16.6976	33.8	25.2929	52.5455	20.8008	32.4167	17.7429
173_y_f_s_a.jpg	a	young	Female	21.9091	18.9339	55	26.7656	44.9091	21.9702	40.5	16.7813	50.7	21.838	54.6667	28.1177
173_y_f_s_b.jpg	b	young	Female	37.1667	22.5785	44.3	32.5749	48.9167	26.6406	47.3	24.7299	57.0909	22.8493	44.0909	19.6237
177_y_f_s_a.jpg	a	young	Female	32.1818	27.0622	65.1538	24.6909	43.1818	25.3725	40	24.5447	46.1	25.9934	53.4167	25.4396
177_y_f_s_b.jpg	b	young	Female	45.3333	26.1372	46.1111	26.6948	47.0909	22.8756	33	23.1214	53.6364	14.9283	36.0833	24.9817
182_y_f_s_a.jpg	a	young	Female	34.5833	25.7416	54.9167	25.6815	48.6364	25.077	45.4	21.277	54.3636	23.7583	52.4545	25.5435
182_y_f_s_b.jpg	b	young	Female	39.8182	29.2363	34.1111	20.0589	47.7273	25.4405	36.6364	19.5104	49.5455	21.1866	48	19.9864
007_m_m_s_a.jpg	a	middleaged	Male	14.2727	17.6414	17.5	19.7092	35.3333	25.9802	21.7778	18.3015	41.8	23.4369	19.2727	19.3085
007_m_m_s_b.jpg	b	middleaged	Male	21.3333	19.8326	18	19.5448	22	18.2209	17.7273	14.3254	32.2	18.1034	12.5	13.3178
014_m_m_s_a.jpg	a	middleaged	Male	11.4167	16.1215	20.1667	16.4197	38.2727	23.8289	28	16.3843	40.6	28.512	30.75	20.4456
014_m_m_s_b.jpg	b	middleaged	Male	26	24.8815	30.7778	24.9639	33.9091	19.8013	22.6364	16.7049	51.0909	16.9673	22.9167	18.9567
026_m_m_s_a.jpg	a	middleaged	Male	16	16.0375	29.8182	16.1853	41.6364	16.7766	32.9	17.0127	47.5	22.7217	44	26.4816
026_m_m_s_b.jpg	b	middleaged	Male	30.0833	23.4267	25.3	24.3176	32.3636	23.6697	30.6	17.7901	47.2	23.213	43.8333	19.0875
032_m_m_s_a.jpg	a	middleaged	Male	16	16.5348	22.3636	16.6149	36	20.199	29.1818	12.2541	52.4	18.4403	37.3636	18.2772
032_m_m_s_b.jpg	b	middleaged	Male	30	23.0651	18.7778	20.21	39.5455	19.8613	24.1667	16.4363	50.2727	21.1333	21.75	22.7361
038_m_m_s_a.jpg	a	middleaged	Male	18.3	17.6953	24.5	18.412	35.1818	16.7142	29.7778	13.5072	46.1111	21.1036	45.5	22.5651
038_m_m_s_b.jpg	b	middleaged	Male	32.8333	21.2425	20.3	21.9041	36.1538	15.8579	23.5556	17.8263	47.9091	21.0687	28.5455	25.8742
045_m_m_s_a.jpg	a	middleaged	Male	13	13.7113	21.25	19.2973	23.9167	18.5004	28.3333	14.4049	38.7	22.9737	24.0833	20.0339
045_m_m_s_b.jpg	b	middleaged	Male	27.4167	21.198	28	19.3907	29.8333	17.8826	28.5	18.686	44.1	17.3746	31.25	24.6581
051_m_m_s_a.jpg	a	middleaged	Male	19.75	20.1365	27.2	21.8673	43.5455	24.4596	28.3	18.5236	53.8	14.928	35.7273	26.2187
051_m_m_s_b.jpg	b	middleaged	Male	23.9167	21.0819	25.875	20.322	34.75	19.5965	24.2222	11.6488	50.4	19.9844	33.7692	21.4327
056_m_m_s_a.jpg	a	middleaged	Male	9.83333	15.5671	18.5455	15.0224	37.1818	13.7027	23.8	17.517	47.8889	26.7509	25.5385	18.8353
056_m_m_s_b.jpg	b	middleaged	Male	22.3636	22.7652	15.3636	17.0192	30.75	20.5653	17.5	16.1881	49.1	19.6551	25.4167	20.255
058_m_m_s_a.jpg	a	middleaged	Male	11.0833	14.3366	34.2727	19.3551	36.5833	22.183	26.6	16.5945	43.4545	22.1285	44.0909	28.8598
058_m_m_s_b.jpg	b	middleaged	Male	26.0909	23.1968	19.3636	19.6584	37.7273	13.5506	26.9091	24.1058	43.7273	17.4819	31.25	19.0126
068_m_m_s_a.jpg	a	middleaged	Male	13.7273	16.1189	22.3636	16.0392	28.1818	25.0512	24.7	16.6537	44.3	22.1061	34	17.7989
068_m_m_s_b.jpg	b	middleaged	Male	20.6667	17.9714	22.9	19.1279	27	13.287	20.4	14.1437	39.8	24.0638	27.6154	19.6704
070_m_m_s_a.jpg	a	middleaged	Male	19.1	13.7877	30.1667	22.2213	42.75	15.7545	40.3333	13.4536	48.0909	23.8472	52.0909	24.6554
070_m_m_s_b.jpg	b	middleaged	Male	28.6667	22.7969	19.3	20.9181	37.75	19.0937	25.3	18.5535	41.8333	25.9679	31.6667	22.701
077_m_m_s_a.jpg	a	middleaged	Male	13.8333	16.8945	25.6	16.4668	37.6667	20.0197	27.8889	17.5531	45	24.3219	26.9091	20.364
077_m_m_s_b.jpg	b	middleaged	Male	21.4167	19.8378	22	20.5697	17.9091	19.639	28.2727	23.1693	41.5	23.1385	29.4167	17.3282
082_m_m_s_a.jpg	a	middleaged	Male	15.5455	17.4892	33.9091	26.8233	38.8182	22.4892	34.8	17.9183	50.4444	25.0904	33	16.0963
082_m_m_s_b.jpg	b	middleaged	Male	22.8182	23.1379	18.6	18.644	24.1818	14.8312	25.0909	13.7	40	16.0748	20.1818	17.1687
087_m_m_s_a.jpg	a	middleaged	Male	25.4167	27.2979	37.6364	26.4737	47.3333	21.6725	44	26.2631	57.5	21.9051	58.9167	28.653
087_m_m_s_b.jpg	b	middleaged	Male	33.1818	23.8572	33.8182	24.0201	42.2727	17.6584	30.0833	22.2892	50.75	20.3966	43.1818	26.6864
092_m_m_s_a.jpg	a	middleaged	Male	10.5	14.4505	18.0909	15.6937	31.5	17.3546	26.8	16.5784	44.7	22.1312	31.4167	16.0989
092_m_m_s_b.jpg	b	middleaged	Male	23.1667	21.6872	28.1	21.1526	28.1818	20.3707	22.6364	15.1279	33.2	22.8318	32.6923	19.7796
094_m_m_s_a.jpg	a	middleaged	Male	18.9	15.9892	32.9167	27.1141	36.0833	19.1333	37	15.8193	49.6	19.0508	38.5833	26.9797
094_m_m_s_b.jpg	b	middleaged	Male	28.75	22.5273	21.2222	20.9987	33.7273	22.4593	36.6364	24.7922	48.9091	23.145	37.25	17.3212
104_m_m_s_a.jpg	a	middleaged	Male	9.27273	8.41535	22.1818	16.6482	42.4545	19.7553	32.8182	16.8096	40.2	19.6514	29.6667	20.6368
104_m_m_s_b.jpg	b	middleaged	Male	26.1667	21.7625	23.6667	22.3886	34.3077	17.909	29.3	23.4001	41.2727	18.3961	28	18.0605
108_m_m_s_a.jpg	a	middleaged	Male	19	16.3156	34	22.5211	40.9091	12.5176	47.3636	22.1733	45	26.5669	30.3636	28.2605
108_m_m_s_b.jpg	b	middleaged	Male	26.75	22.0912	23.4	20.3317	22.8182	16.6542	30.0909	25.4458	44.7	21.1137	18.5385	15.7248
116_m_m_s_a.jpg	a	middleaged	Male	14.9091	17.5582	29.9091	22.492	35.2727	19.6423	28.1818	16.7381	39.2	21.4362	25.5455	15.8453
116_m_m_s_b.jpg	b	middleaged	Male	27.3333	24.4701	20.9	19.5701	33.7273	17.0123	19.75	16.6249	29.5455	20.2354	17.1667	14.862
126_m_m_s_a.jpg	a	middleaged	Male	20.3	20.6723	38	22.5066	42.6364	20.368	36.3636	23.7793	46.4545	18.646	39.8182	24.4083
126_m_m_s_b.jpg	b	middleaged	Male	24.6667	19.997	27.5556	22.9407	30.1667	19.0016	30.8	22.285	42.6364	25.2281	31.75	13.1987
136_m_m_s_a.jpg	a	middleaged	Male	8.77778	14.1225	17.25	18.6651	22.3636	15.7751	22.6	17.6522	40.7778	25.1534	26.1667	16.2974
136_m_m_s_b.jpg	b	middleaged	Male	15.9091	17.9078	17.6	17.3986	20.4545	15.7122	17.1818	14.7568	34	18.9473	17.3333	15.1317
142_m_m_s_a.jpg	a	middleaged	Male	15.1818	21.7982	30.1818	23.4939	31.0833	17.3544	30	17.5926	32.3	22.5194	27	28.0286
142_m_m_s_b.jpg	b	middleaged	Male	26.9167	24.53	18.1	18.6217	29.0909	17.0731	23.8182	14.1832	29.9	19.3818	27.3077	20.3568
149_m_m_s_a.jpg	a	middleaged	Male	15.8333	16.53	23.4	19.8729	33.75	23.6494	29.3333	18.4797	47.3636	22.092	37.9091	26.9609
149_m_m_s_b.jpg	b	middleaged	Male	26.75	21.4439	19.8889	20.3804	36.3636	16.2313	23.7273	15.5119	45.3	26.5458	34.5	20.5935
155_m_m_s_a.jpg	a	middleaged	Male	20.5	17.0374	21.8182	17.0811	40.5	16.4068	33.1111	22.3296	44.6667	23.2916	38.8462	23.9995
155_m_m_s_b.jpg	b	middleaged	Male	24.1667	22.5583	24.1	21.0684	39.8182	18.6162	28.5455	23.7418	53.8	20.7193	35	18.7665
159_m_m_s_a.jpg	a	middleaged	Male	13.6364	18.4351	36.5833	31.1023	27.8	20.2748	38.1818	16.461	48.6	23.5004	22.25	21.872
159_m_m_s_b.jpg	b	middleaged	Male	33.4167	22.881	19.4	21.402	31.75	16.5206	20.5	17.469	34.8	21.488	30.3846	20.0106
165_m_m_s_a.jpg	a	middleaged	Male	10.8182	12.7029	28.0909	22.2686	38	24	40.0909	18.7428	39.5	23.4864	28.2727	28.4081
165_m_m_s_b.jpg	b	middleaged	Male	22.25	21.6884	30.6	21.9504	31.0833	16.2394	22.8	16.1438	25.9	19.9636	25.5	16.3457
169_m_m_s_a.jpg	a	middleaged	Male	13.3	13.5651	24.3333	18.3121	31	22.2629	31.5556	15.7964	42.8	24.8944	34.5455	23.9139
169_m_m_s_b.jpg	b	middleaged	Male	28.6364	22.2048	18.7	20.3145	22.3636	17.523	21.7273	18.2707	36.8	19.3552	29.25	19.6891
178_m_m_s_a.jpg	a	middleaged	Male	26.4545	20.2897	43.1818	23.7142	51.8333	17.1614	50.3	20.4344	54.2222	20.8613	51.2308	25.7039
178_m_m_s_b.jpg	b	middleaged	Male	28.1667	21.4002	31.3	25.695	39.9091	19.5625	30.6364	19.5513	39.4	19.9789	35.4167	21.3646
179_m_m_s_a.jpg	a	middleaged	Male	20.8	19.8427	34.5	17.3441	39.6364	15.4743	40.8	13.9268	52.2	23.6775	40.5	24.1341
179_m_m_s_b.jpg	b	middleaged	Male	26.5833	20.1335	25.8	22.6804	34	18.2408	29.5	15.8202	43.7273	19.865	30.8333	20.9234
006_m_f_s_a.jpg	a	middleaged	Female	29.8333	28.0805	58.9091	21.0164	46.2727	23.5673	49.8	22.6019	49.6667	25.4755	47.5	31.6357
006_m_f_s_b.jpg	b	middleaged	Female	46	23.7602	62.9	27.5457	57.2727	25.7181	36.9091	19.9823	57.4	21.2613	53.4545	25.4416
011_m_f_s_a.jpg	a	middleaged	Female	12.5	10.8449	37.8333	20.5729	43	27.1477	35.3	15.4851	47.9	15.9266	34.1818	17.1861
011_m_f_s_b.jpg	b	middleaged	Female	23.3333	20.5971	19	27.0801	42.3	20.1718	26.3333	21.5884	36.3636	30.0142	25.9167	21.2066
019_m_f_s_a.jpg	a	middleaged	Female	16.75	18.6894	45.3636	24.2086	43.0909	22.4831	41	20.7894	41	24.2441	38	26.9555
019_m_f_s_b.jpg	b	middleaged	Female	25	21.2646	27	24.5706	42	17.9382	36.8182	13.7972	43.4	23.6746	38.3846	18.205
029_m_f_s_a.jpg	a	middleaged	Female	15.4167	15.1445	38	23.39	46.4167	24.8027	45.7	22.9978	41.4	23.9407	43.5455	23.4323
029_m_f_s_b.jpg	b	middleaged	Female	29.25	27.7918	32.4	21.2457	44.2727	19.1316	26.8182	19.9089	38.8333	23.9956	26.5455	21.5795
035_m_f_s_a.jpg	a	middleaged	Female	17.3846	15.6766	21.8182	16.2346	31.9167	16.3566	21.5	20.6519	45.6	26.4542	28.1818	16.4913
035_m_f_s_b.jpg	b	middleaged	Female	21.5833	19.8378	17.6667	18.5607	26.5833	15.9969	29.5	22.6483	32.0909	19.9472	22.7273	19.3499
043_m_f_s_a.jpg	a	middleaged	Female	14.5833	13.4938	25.6364	17.5058	28.5833	24.4743	27.6	19.1787	38.2	21.3687	39.6667	28.921
043_m_f_s_b.jpg	b	middleaged	Female	15.3636	18.6616	27	21.721	36.6	23.9963	17.0833	14.016	33.7273	27.514	21.2727	22.2265
050_m_f_s_a.jpg	a	middleaged	Female	8.63636	7.61935	24.0833	28.2857	33.6364	19.6432	36.9	25.2298	36.8	29.0165	31.6364	21.2569
050_m_f_s_b.jpg	b	middleaged	Female	25.1667	19.1493	22.2	21.3167	36.75	29.0145	26.6	22.7947	41.3	24.2123	33.5833	23.7083
052_m_f_s_a.jpg	a	middleaged	Female	23.1818	16.8393	37.9091	18.0524	49.0909	18.2836	29.1111	12.0254	54.5455	19.9718	38.1818	21.4421
052_m_f_s_b.jpg	b	middleaged	Female	27.4167	23.0275	23.1111	22.8498	40.8182	18.6484	27	18.0167	44.6	28.8798	27.5833	17.7941
061_m_f_s_a.jpg	a	middleaged	Female	34.5455	28.7867	63.8182	20.6534	52.3636	22.2813	50.1	20.9892	56.8	18.9608	57.5455	29.9244
061_m_f_s_b.jpg	b	middleaged	Female	47.25	19.8775	57.6667	33.3242	51.25	26.0598	42.0909	20.9067	44.9	14.8507	45	22.9901
064_m_f_s_a.jpg	a	middleaged	Female	27	22.5043	39.0833	22.988	44	13.4981	46.7	17.9013	50.6	24.5683	38	24.2817
064_m_f_s_b.jpg	b	middleaged	Female	29.3333	25.2022	30	21.0291	47.9091	12.8098	37.4545	20.6948	55.0909	8.85951	34.5833	27.0369
073_m_f_s_a.jpg	a	middleaged	Female	28.4167	24.7035	58.1	16.7229	47.0909	16.6039	55.0909	13.1868	55	24.6622	44.1667	21.3577
073_m_f_s_b.jpg	b	middleaged	Female	34.4167	22.2525	56.2	30.8538	52.4545	25.2878	31.2727	19.6728	42.3333	23.0822	38.9091	21.389
080_m_f_s_a.jpg	a	middleaged	Female	22.3636	20.9345	45.4545	14.1093	41.5	17.4799	41.3333	16.1168	48.4	26.4415	34.6364	17.4085
080_m_f_s_b.jpg	b	middleaged	Female	28.9167	24.6704	41.8	20.3186	43	23.795	32.3636	20.3778	44.3636	29.2857	34.3333	21.9807
084_m_f_s_a.jpg	a	middleaged	Female	19	17.2105	39.8333	21.561	40.7273	18.1278	33.4	16.5945	44.3	24.0973	39.1818	24.3591
084_m_f_s_b.jpg	b	middleaged	Female	29.0833	25.5537	35.6667	20.8806	38.6667	27.3607	21.1818	20.7645	47.5455	24.586	28.9167	18.9471
093_m_f_s_a.jpg	a	middleaged	Female	13.6364	15.3119	33.1667	22.3681	47.3636	17.7216	32.8	16.8642	40.5455	21.1488	39	16.7153
093_m_f_s_b.jpg	b	middleaged	Female	25.5833	22.183	26.9	20.6691	29.2727	23.7449	20.9091	14.0958	39.6364	23.3207	31.8333	23.3893
097_m_f_s_a.jpg	a	middleaged	Female	12.3	12.8759	30.6667	21.4533	32.3636	17.7441	36.5	16.9787	49.5556	24.7644	32.6667	20.8428
097_m_f_s_b.jpg	b	middleaged	Female	27.25	22.2103	20	19.1137	30.1667	17.8215	32.7	17.4168	32.9	22.5559	25.3333	19.2842
103_m_f_s_a.jpg	a	middleaged	Female	21.2727	20.9528	34.1667	18.5807	48.8333	19.8761	41.2	16.518	48.9091	20.7145	41.5455	22.9494
103_m_f_s_b.jpg	b	middleaged	Female	22.2727	23.9211	37.4545	21.4493	42.7273	25.0683	32.2727	19.4118	36.2	20.5307	27.6667	18.8406
111_m_f_s_a.jpg	a	middleaged	Female	25.6667	27.9133	46.9091	17.2015	39.2727	19.7083	43.6	19.5516	41.6	30.42	36.25	27.2334
111_m_f_s_b.jpg	b	middleaged	Female	32	21.7394	48.2	24.3027	48.6364	21.8141	39.8182	13.9773	63.1	10.4398	38.3333	19.7407
113_m_f_s_a.jpg	a	middleaged	Female	19.75	19.726	49.0909	21.1398	47.1818	21.7753	43	22.5339	50.3	25.7813	46.6364	27.8111
113_m_f_s_b.jpg	b	middleaged	Female	34.0833	26.0679	46.1	27.1475	36.8462	19.3384	36.2	20.1869	45.1	17.9595	25	22.6836
117_m_f_s_a.jpg	a	middleaged	Female	33.5833	20.1741	49.25	20.7895	55.9091	17.8407	48.7	20.4996	70.7	17.4614	57.1818	27.5493
117_m_f_s_b.jpg	b	middleaged	Female	37.8333	23.3854	32	28.7228	53.4545	23.084	30.9167	20.2146	62.8182	21.6694	45.5833	24.978
122_m_f_s_a.jpg	a	middleaged	Female	16	18.0601	37.9	24.7002	41.7273	22.619	36.6364	16.1262	44.6	23.0565	33.0909	23.2957
122_m_f_s_b.jpg	b	middleaged	Female	21.5833	19.4631	27.7778	18.8532	31.9091	21.4124	29.9091	20.5594	46.6	18.2586	29.6667	25.5426
128_m_f_s_a.jpg	a	middleaged	Female	15	14.7919	30.1667	15.0926	43.9091	24.4191	37.6	19.2539	49.9	26.6394	39.5	17.1967
128_m_f_s_b.jpg	b	middleaged	Female	21.0833	20.2415	30.2	24.5257	36.5833	22.4518	23.5	17.1286	47.9091	20.5302	31.0833	20.147
138_m_f_s_a.jpg	a	middleaged	Female	15.25	13.0044	35.5833	12.124	36.1818	25.2975	34.4545	13.5082	45.0909	26.4668	36.7	27.8689
138_m_f_s_b.jpg	b	middleaged	Female	23.4167	22.2443	25.2	20.2583	38	27.8998	28.4545	18.6192	51.1	21.972	29.3846	21.7046
139_m_f_s_a.jpg	a	middleaged	Female	23.2	15.8661	47.9231	20.8065	47.0833	21.3561	49.4	22.8483	49.7	24.1065	48.1818	19.5797
139_m_f_s_b.jpg	b	middleaged	Female	33.7273	22.0775	38.9	25.8476	50	24.2858	32.1818	16.5518	58.9	23.5582	43.6923	15.9185
156_m_f_s_a.jpg	a	middleaged	Female	13.5	12.1244	24.8333	18.8189	35.1818	24.6812	34.6	20.7429	51.1	25.727	37.7273	15.8246
156_m_f_s_b.jpg	b	middleaged	Female	15.9167	17.4952	19.5	22.5844	35.1	24.0298	23.0909	16.3062	47.8182	16.2531	23.7273	17.4361
157_m_f_s_a.jpg	a	middleaged	Female	23.6	21.376	55.3077	15.6332	44.5455	13.2466	54	12.8755	58.7273	22.1002	59.9091	27.0646
157_m_f_s_b.jpg	b	middleaged	Female	34.9167	27.3644	49.8889	22.161	43.5455	17.4949	40.2727	18.9002	57.7	23.9121	38.0833	21.7275
168_m_f_s_a.jpg	a	middleaged	Female	17.1667	18.2549	45	20.1585	46	16.3279	45.2	16.8048	50.8	23.489	42.5	25.865
168_m_f_s_b.jpg	b	middleaged	Female	24.1818	21.8303	27.6364	22.6816	50.3	24.4634	27	15.6263	50.1818	20.634	33.4167	24.6962
180_m_f_s_a.jpg	a	middleaged	Female	19	19.8311	39.9167	25.9	34.5455	19.5364	46.6	14.6606	36.2727	22.76	31.2727	17.8555
180_m_f_s_b.jpg	b	middleaged	Female	18.6364	19.8357	32.3636	28.3876	26.5455	23.3511	24.5455	17.5121	31.3	23.1519	17.9167	17.8247
004_o_m_s_a.jpg	a	older	Male	25.8333	26.3985	27.1818	20.3018	44.2727	9.57174	45.7	20.2213	51.4	22.9114	44.0833	28.2053
004_o_m_s_b.jpg	b	older	Male	32.6364	27.8578	40	24.3639	43.2727	22.1589	27.3636	20.7667	50.4545	14.0383	39.5	27.1745
015_o_m_s_a.jpg	a	older	Male	15.3636	17.3682	28.6364	17.031	42.0909	13.9173	31.1	15.7371	38.8	21.4155	33.8182	27.813
015_o_m_s_b.jpg	b	older	Male	25.5	24.0737	21.9	21.4137	29.7273	23.7701	30.5455	18.1404	43.3	26.2215	24	17.1411
018_o_m_s_a.jpg	a	older	Male	9.16667	11.2236	24.1667	20.5508	33.5833	18.5935	36.8889	23.9763	40.5455	22.8402	34.6364	19.1116
018_o_m_s_b.jpg	b	older	Male	19.1818	21.5677	20.6364	15.9579	18	17.7889	15.3333	12.9146	34.1111	23.582	22.6923	20.8102
027_o_m_s_a.jpg	a	older	Male	13	15.1364	27.8182	20.7356	38.2727	19.1525	32.6	16.3517	48.9	25.571	27.25	21.0157
027_o_m_s_b.jpg	b	older	Male	24.3333	20.5264	24	20.2485	29.5	16.9625	19.5455	14.1941	43.3	22.7891	20.3846	21.1917
033_o_m_s_a.jpg	a	older	Male	22.5833	18.4463	35	25.9191	48.3636	14.6443	42.8	18.4379	56.2222	21.3353	40	16.1583
033_o_m_s_b.jpg	b	older	Male	31.5	26.9022	26.8	24.7422	30.9	14.9105	35.5455	15.8516	51.0909	23.0541	41.75	22.4464
039_o_m_s_a.jpg	a	older	Male	9.16667	11.8769	31.0909	28.9947	43.4	17.7401	23.8182	15.5616	42.8889	25.1368	26.3333	19.8418
039_o_m_s_b.jpg	b	older	Male	20.3333	21.4236	20.4	17.405	25	19.5141	20.5455	12.3803	36.6364	19.5052	14.4167	16.844
042_o_m_s_a.jpg	a	older	Male	9.45455	12.8169	29.1667	20.4532	35.8182	18.1153	24.8	17.171	41.6667	23.3934	26.4167	18.1732
042_o_m_s_b.jpg	b	older	Male	24.4167	22.5407	17.7	17.3721	27.7273	22.7028	20.5455	15.6356	45.8182	20.6486	16	16.9169
046_o_m_s_a.jpg	a	older	Male	5.63636	11.147	18	18.4228	24.1667	22.2867	16.3333	13.7568	38.5455	25.0853	18.0909	17.6264
046_o_m_s_b.jpg	b	older	Male	12.0909	11.7086	15.8182	19.0201	15.7273	14.4851	11.6364	11.6985	28.6364	19.9413	17.1667	16.163
053_o_m_s_a.jpg	a	older	Male	18.6364	19.2004	28.5455	17.6995	32.8333	17.466	33.8	19.4354	37.7273	21.8591	26.2727	20.785
053_o_m_s_b.jpg	b	older	Male	16.6	17.4623	25.7273	19.4427	29.3636	18.3427	21.2727	17.0944	44.8182	18.2747	20.9091	22.4787
059_o_m_s_a.jpg	a	older	Male	9.63636	12.8551	19.4167	16.3399	33.3636	21.8507	30.8	16.0402	44	29.0172	21.8	19.7642
059_o_m_s_b.jpg	b	older	Male	20.9167	23.0354	26.6	20.0289	27.75	19.7812	19.6364	15.2071	40.9091	23.6409	15.75	16.7773
065_o_m_s_a.jpg	a	older	Male	18.1818	22.0808	35.0833	25.0725	41	15.4096	42	16.8259	46.8	28.1496	27.3636	16.2559
065_o_m_s_b.jpg	b	older	Male	19.9167	19.7919	26.4444	24.3573	28.4167	17.0638	21.9	15.0292	39.6	17.456	17.8333	15.7471
074_o_m_s_a.jpg	a	older	Male	10.4	11.8715	21	16.1189	38.1818	23.125	25	13.7032	41.3	22.4254	14.8182	16.7739
074_o_m_s_b.jpg	b	older	Male	20.4167	21.2451	17.9	21.977	15.9091	14.4807	15.6364	13.8872	34.4	20.956	12.0833	11.6264
076_o_m_s_a.jpg	a	older	Male	9	12.9443	26.8333	21.1481	33.3333	16.4058	26	14.9146	46.9	24.0899	24.4545	14.7943
076_o_m_s_b.jpg	b	older	Male	20.8182	21.4701	29.4	21.1566	23.7	21.3075	21.0833	12.4423	36.5455	16.1701	18.8333	16.0331
083_o_m_s_a.jpg	a	older	Male	10.8333	12.5758	22.5455	22.1466	38.8333	18.7026	33.3333	19.3714	46.4	23.8663	33.8182	18.1869
083_o_m_s_b.jpg	b	older	Male	21.3333	19.1707	23.7	23.2334	20.5455	19.2944	17.0909	13.1792	50.2	20.7461	28	23.848
091_o_m_s_a.jpg	a	older	Male	12.1818	17.8371	27.0909	18.9074	38.6364	11.8598	40.1818	14.9854	47.9091	24.9818	40.7	34.5577
091_o_m_s_b.jpg	b	older	Male	22.6667	20.0786	15.5556	17.3213	27.9091	20.0871	21.4545	16.8366	39.7	22.964	33.5	21.7653
102_o_m_s_a.jpg	a	older	Male	15.8333	19.5626	32.8333	23.3816	40.0909	20.1269	31.8182	18.557	47.4444	23.9223	35.6667	21.706
102_o_m_s_b.jpg	b	older	Male	26	22.9149	35.6	24.0102	31.6364	22.4289	19.8182	12.6081	40.7273	22.2085	20.6364	14.7124
107_o_m_s_a.jpg	a	older	Male	12.0909	14.5702	20.6667	19.7361	41.7273	19.6372	22.7	17.4168	47.8	25.42	21.4545	17.7672
107_o_m_s_b.jpg	b	older	Male	18.3636	19.3663	21.6364	23.3207	24	17	21.7273	13.5432	31.9167	21.4496	13.5833	12.2509
118_o_m_s_a.jpg	a	older	Male	19.1818	22.2523	25.7692	22.6169	28.6364	22.6551	27.2	16.2877	38.4	21.6292	22.2727	15.1267
118_o_m_s_b.jpg	b	older	Male	23	19.0645	19.5	18.6919	28.1818	19.3898	19.3636	14.9417	36.1667	20.5109	16.2727	16.7755
121_o_m_s_a.jpg	a	older	Male	8.1	8.03396	19	18.752	26.3636	12.266	20	19.5789	37.7273	20.1151	21.5	21.004
121_o_m_s_b.jpg	b	older	Male	17.75	18.4052	19.4444	20.0693	21.7273	14.779	14.8182	11.4875	32	18.5796	11.5	15.4302
131_o_m_s_a.jpg	a	older	Male	13.2308	18.5749	21.1	18.3209	27.2	16.4371	27.9091	18.2124	41.1	20.626	20.8333	18.0798
131_o_m_s_b.jpg	b	older	Male	17.5	18.9713	21.1	22.5903	20.7273	17.6017	18.9167	14.5631	30.9091	19.1283	16.0833	20.5668
137_o_m_s_a.jpg	a	older	Male	16.75	18.67	16.9091	18.4849	39.3636	15.2923	34.4545	17.0257	49.3636	22.0965	35.8	16.518
137_o_m_s_b.jpg	b	older	Male	20.5833	21.5763	22.4444	21.9608	23.9	16.4482	19.7273	14.4989	45.4545	24.3449	17.4167	14.003
141_o_m_s_a.jpg	a	older	Male	8.08333	12.0337	19.6	24.7575	23.4167	28.9622	21.6667	18.5203	37.8889	19.4451	13.6667	13.2825
141_o_m_s_b.jpg	b	older	Male	17.1818	18.4706	8.54545	13.2164	16.3636	15.3576	14.8182	12.3436	27.4545	20.9206	11.1667	12.7267
146_o_m_s_a.jpg	a	older	Male	16.3	20.1663	29.8333	24.1542	32.8182	15.5423	31.2727	14.806	46.3636	19.77	31.6364	21.1767
146_o_m_s_b.jpg	b	older	Male	30.5	29.5589	29.5	16.5788	25.3636	12.824	23.7273	12.4907	35.4545	21.2149	15.9167	14.939
151_o_m_s_a.jpg	a	older	Male	7.45455	8.77911	24.75	20.2894	31.8182	15.0653	35.1	17.3362	38.1	27.8785	26	21.8952
151_o_m_s_b.jpg	b	older	Male	19.5	21.6228	18.5	21.8848	27.1818	17.7641	26.9091	21.3844	26.4444	23.8543	25.6154	20.0147
161_o_m_s_a.jpg	a	older	Male	4.3	10.2095	18.25	23.9664	25.2727	15.8246	19.9	16.6096	37.2727	30.1864	20.4545	20.8152
161_o_m_s_b.jpg	b	older	Male	15.6667	18.8696	15.1	15.0588	15.1	14.0511	16.75	12.3592	28.4167	17.4952	9	12.9306
166_o_m_s_a.jpg	a	older	Male	21.1667	17.8266	37.25	23.4719	44.9231	19.5425	40.6667	23.103	50.2	21.2122	44.1818	26.5097
166_o_m_s_b.jpg	b	older	Male	27.2727	22.4191	21.6364	22.0285	32.0909	19.7608	29.7	19.9335	46.4545	25.3273	23.7273	21.4713
172_o_m_s_a.jpg	a	older	Male	16.0833	22.4761	16.9	13.4697	26.25	19.9824	23.9	14.1927	38.6	20.9666	25	17.3729
172_o_m_s_b.jpg	b	older	Male	21.9167	18.7881	23.6	19.2365	26.1818	18.1153	19.2	17.1257	39	22.6451	24.3333	17.8087
176_o_m_s_a.jpg	a	older	Male	6	6.71648	21.8182	16.3818	31.75	21.9923	19.7778	13.9174	41.5	28.3167	22	19.2302
176_o_m_s_b.jpg	b	older	Male	23.4167	23.9676	24.1111	17.6029	26.8333	20.2297	24.3636	15.2399	31.6	21.2038	21.6154	21.1681
005_o_f_s_a.jpg	a	older	Female	9.53846	9.82018	19.9	20.0192	34.2727	18.1884	26.2	15.936	40.9	22.6787	25.0909	19.5676
005_o_f_s_b.jpg	b	older	Female	22.25	19.6058	29.9	19.0698	25.6667	18.2674	18.5	11.6928	38.75	28.3905	18.3333	16.9563
012_o_f_s_a.jpg	a	older	Female	11.5455	15.1153	34.3636	23.8297	31.6364	15.0418	37.2	18.183	39.6364	22.0058	31.0909	20.2062
012_o_f_s_b.jpg	b	older	Female	29.9167	22.3178	39.5556	27.8662	24.2727	18.067	23.1818	19.8183	38	21.2838	29.4545	22.3131
021_o_f_s_a.jpg	a	older	Female	21.5385	22.025	42.7273	18.3635	45.4167	16.4176	48.2	16.8708	48.7	25.5084	36.4167	22.5447
021_o_f_s_b.jpg	b	older	Female	29.4167	24.567	35.1	22.0729	36.6667	14.4684	28.6	20.1395	54.9	22.6542	34.6154	21.9148
024_o_f_s_a.jpg	a	older	Female	8.83333	11.2479	22.3636	19.9563	32.0909	16.8194	27.4545	18.9017	44.9	23.1538	29.4545	18.9175
024_o_f_s_b.jpg	b	older	Female	18.1818	20.1833	29.5455	20.5347	21.0833	13.4263	21.4	17.2124	38.3636	19.2576	24.4167	17.9315
030_o_f_s_a.jpg	a	older	Female	24.0909	25.89	61.25	21.5285	48.5	14.5696	57.7778	23.344	53.7	26.8123	43	25.3417
030_o_f_s_b.jpg	b	older	Female	35.1818	28.9476	55.1818	31.0896	46.9091	24.6717	28.2	15.8451	45.9	22.8884	39.6667	19.1991
036_o_f_s_a.jpg	a	older	Female	18.6364	19.7751	41.8182	19.7374	41.0909	18.6304	36.8	18.6297	42.8	24.7602	40.6364	25.9895
036_o_f_s_b.jpg	b	older	Female	28.0833	23.1574	27.4	20.2331	23.1667	17.606	22.5	18.7986	41.3	15.3843	20.8182	15.93
044_o_f_s_a.jpg	a	older	Female	2.45455	4.29799	25.3846	18.021	35.4545	22.0607	25.6	15.629	41.4	24.0979	23.8182	20.049
044_o_f_s_b.jpg	b	older	Female	17.5	19.5843	16.5	16.7481	26	16.0284	24.0909	19.7406	31.2	24.939	25	22.8838
047_o_f_s_a.jpg	a	older	Female	15.9091	21.154	34.9167	30.0196	42.9091	17.6037	39.8	16.9234	38.6	19.5914	35.3636	26.5227
047_o_f_s_b.jpg	b	older	Female	29.25	19.8179	30.3	26.9899	34.1818	19.5592	28.3636	18.2059	41.7	24.4951	21.6667	16.5383
055_o_f_s_a.jpg	a	older	Female	11.8333	16.6506	27.4545	17.0609	33.4545	25.649	30.9	15.5524	38.3636	26.8376	31	17.7764
055_o_f_s_b.jpg	b	older	Female	27.4545	23.4707	26	22.8298	24.75	16.471	24.3	19.2991	42.2727	21.3967	25.4167	19.2281
060_o_f_s_a.jpg	a	older	Female	19.25	21.6464	33.9091	12.9496	40.3636	19.2004	34.9	15.3076	49.6667	22.6274	28.2308	20.7892
060_o_f_s_b.jpg	b	older	Female	26.5	23.9108	25.9	21.9972	30.8182	19.0988	28.2727	12.0838	36.5455	14.4178	21.1667	15.1107
067_o_f_s_a.jpg	a	older	Female	25.8333	26.778	35.75	20.916	43.2727	15.6019	45.6	17.5259	49.9	25.0619	32.5455	20.4321
067_o_f_s_b.jpg	b	older	Female	25.5833	23.9714	26	20	38.3636	24.2498	26.8182	12.4885	46.5	19.6878	32.5	21.669
075_o_f_s_a.jpg	a	older	Female	11	16.0227	37.4167	21.7985	34.1818	23.1854	32.9	19.6211	39.1818	19.4361	34	20.7364
075_o_f_s_b.jpg	b	older	Female	26	23.4598	35.8889	29.6076	25.6	16.1328	28.9167	20.4026	40	25.2982	36.1538	17.9436
079_o_f_s_a.jpg	a	older	Female	14.8182	20.8126	27	17.6352	40.8182	19.4258	27.3	16.0073	45.2727	20.0504	30.0909	22.9279
079_o_f_s_b.jpg	b	older	Female	20.4545	20.0368	31.1	21.3305	24.8333	26.6555	21.1	13.9877	32	19.8444	20	18.7131
086_o_f_s_a.jpg	a	older	Female	9.83333	11.9075	24.4167	22.146	25.2727	16.0754	33.5455	15.462	33.5556	26.6932	22.6667	21.466
086_o_f_s_b.jpg	b	older	Female	20.1818	20.5612	26.1818	23.125	24.7273	21.4806	16	13.0384	23.3636	18.1068	19.9091	18.4903
088_o_f_s_a.jpg	a	older	Female	12.5556	22.114	35.0769	22.2765	25.5833	21.1035	42.3333	19.3326	33.4	23.59	28.1818	33.5673
088_o_f_s_b.jpg	b	older	Female	23.0833	20.9348	27.4	26.4668	26.5455	18.1459	13.2	13.2983	31	21.9747	17.6154	22.6257
096_o_f_s_a.jpg	a	older	Female	10.8	21.6014	38.8333	20.6038	34.9091	14.321	57.3	12.4726	44.1111	25.5414	26.4167	28.2311
096_o_f_s_b.jpg	b	older	Female	28.4167	23.5814	38.2	21.3271	34.8333	20.7708	38.5455	21.3886	44.3636	17.3624	28.5	20.1607
100_o_f_s_a.jpg	a	older	Female	13.0909	17.0321	29.3333	21.0252	31	19.0146	39.0833	18.4758	38.3	27.4269	15.9167	14.6564
100_o_f_s_b.jpg	b	older	Female	28.3636	27.6343	18.9091	16.477	20.8333	17.5387	23	16.9706	35.5455	20.6512	16.9167	18.7396
110_o_f_s_a.jpg	a	older	Female	6.54545	11.3081	19.9091	19.4805	35.4545	25.0015	29.1818	13.9844	39.6	24.1532	23.3636	14.7056
110_o_f_s_b.jpg	b	older	Female	22.0833	18.7445	18.7778	19.4344	22.4545	15.5972	20.3636	19.9212	30.6364	21.1578	17	18.4499
112_o_f_s_a.jpg	a	older	Female	11.6	20.2331	23.6364	21.6623	28.2727	18.7728	37	21.3542	43.1111	23.877	31.5833	29.761
112_o_f_s_b.jpg	b	older	Female	30.4167	24.3253	24.9	25.9249	30	18.1859	19.8	22.0897	41.1	22.4522	26.1667	28.5715
120_o_f_s_a.jpg	a	older	Female	14.4167	15.2581	22.8182	21.0229	38.6364	24.5857	38.5	13.9144	45.6667	24.6627	30.6667	22.0303
120_o_f_s_b.jpg	b	older	Female	22.25	23.1718	27.7778	19.1819	29.8333	14.2116	26.1818	13.6368	28.8	22.1951	30.75	22.3896
124_o_f_s_a.jpg	a	older	Female	19.2727	25.6129	38	22.4143	40.5455	19.2373	38.6	13.4429	38.9	26.5684	27.8333	21.3108
124_o_f_s_b.jpg	b	older	Female	24.8333	20.8537	28.1111	29.366	21.3333	18.2026	25.3	16.5062	32.6	22.142	28.1538	18.9774
130_o_f_s_a.jpg	a	older	Female	4.45455	8.20199	16.6667	19.4017	30.9091	21.2577	28.7	15.4923	42.7	24.2993	28.7273	28.0823
130_o_f_s_b.jpg	b	older	Female	22.0833	21.6436	13.7778	19.4151	15.8333	17.9941	21	16.3435	31.6364	26.4925	18.8333	22.5261
133_o_f_s_a.jpg	a	older	Female	4.36364	7.56667	24.3	18.1479	28.1667	16.4584	25.4444	18.201	38.8182	25.93	26.7273	19.1211
133_o_f_s_b.jpg	b	older	Female	25.75	22.3001	31	22.2611	35.0909	15.1753	21.7273	17.5276	30.8182	23.2457	22.1667	22.4857
143_o_f_s_a.jpg	a	older	Female	12.0833	16.3733	35.4545	27.3217	29.6364	23.8255	33.4	15.8759	41.8	23.7665	26.5833	19.9384
143_o_f_s_b.jpg	b	older	Female	16.0833	17.0532	26.8889	23.751	16.6364	16.1448	23.5455	21.1204	32.5455	23.4494	20.2727	20.1201
148_o_f_s_a.jpg	a	older	Female	11.2727	15.2256	21.8182	17.7697	26.5455	19.3099	31.8	19.7642	47.6	25.8078	26.75	19.0555
148_o_f_s_b.jpg	b	older	Female	23.0833	19.847	23.8889	21.607	25.6364	18.5703	28.5	17.433	35	20.9905	18.8333	15.9877
154_o_f_s_a.jpg	a	older	Female	9	18.8915	20.2727	21.067	27.2727	23.4653	29.7	18.1295	30.0909	25.2089	18.5455	20.5103
154_o_f_s_b.jpg	b	older	Female	10.75	12.5996	22.2222	19.1884	12.25	10.8805	12.2727	10.6027	16	17.0294	10.4	10.9463
158_o_f_s_a.jpg	a	older	Female	6.72727	11.1004	32.9091	21.154	32	18.477	41.5455	22.8883	44	25.1992	18.3333	16.6479
158_o_f_s_b.jpg	b	older	Female	21.3333	18.6369	31.125	21.4638	22.9091	16.718	17.3333	14.8099	27.4545	23.5939	13.6667	13.6936
164_o_f_s_a.jpg	a	older	Female	8.9	11.5128	26.0833	15.814	33.5833	20.5668	31.6667	17.088	44.6	25.4873	33.5	23.9108
164_o_f_s_b.jpg	b	older	Female	27.75	20.141	31.4444	22.2042	25	17.7713	25	14.3914	30.6	23.6041	33.5833	20.1018
174_o_f_s_a.jpg	a	older	Female	7	10.1094	24.0909	20.7724	37.2727	14.4851	37.9091	16.8312	48.6	22.3119	31.4545	26.8565
174_o_f_s_b.jpg	b	older	Female	14.0833	16.4839	22.2	20.5037	29.9091	21.5242	27.0909	23.1536	34.8	21.6477	28.5833	24.2729

## Sheet: attr_angry
Picture	Set	Face Age	Face Gender	Mean_YM_attr	SD_YM_attr	Mean_YF_attr	SD_YF_attr	Mean_MM_attr	SD_MM_attr	Mean_MF_attr	SD_MF_attr	Mean_OM_attr	SD_OM_attr	Mean_OF_attr	SD_OF_attr
008_y_m_a_a.jpg	a	young	Male	16.4	17.5639	28.25	20.3118	37.0909	15.3262	36.1	17.0779	52.8182	17.3368	57.4545	31.5035
008_y_m_a_b.jpg	b	young	Male	24.4545	24.0431	27.7	26.5918	40.6364	23.2175	31.25	21.6548	34.4545	30.2535	31	25.5379
013_y_m_a_a.jpg	a	young	Male	26.3077	23.9074	32.6667	25.6633	30.7273	21.1712	38.1	16.8882	41.5	20.2937	34.9091	23.1795
013_y_m_a_b.jpg	b	young	Male	27.9167	23.9373	26.7778	25.8301	34.9167	16.0763	31.9	17.2977	39.6364	21.3742	28.1667	17.9941
016_y_m_a_a.jpg	a	young	Male	22.9091	20.8588	32.5455	22.0244	36.1	14.8881	27.9091	21.8516	46.5	23.6467	32.1818	29.3626
016_y_m_a_b.jpg	b	young	Male	35.5833	28.3948	36.2	18.7427	42.0909	23.1925	25.7273	25.8228	36.5	23.9548	36.9167	15.6754
025_y_m_a_a.jpg	a	young	Male	16.5455	16.5067	28.1818	17.6001	34.25	18.5184	30.4	19.6141	49.8	19.0776	51.8182	24.8991
025_y_m_a_b.jpg	b	young	Male	24.5	23.2907	20.625	22.2578	41.4545	17.5292	25	16.8285	46.9091	21.0117	32.5	26.3491
031_y_m_a_a.jpg	a	young	Male	23.9	22.2783	49.6154	26.4498	50.4545	14.2152	48.6	23.9453	49.2	20.0044	44.7273	24.2037
031_y_m_a_b.jpg	b	young	Male	37.75	29.8911	46.8889	26.7182	55.6364	19.387	34.0909	22.0883	48.8	22.8318	38.3846	23.0562
037_y_m_a_a.jpg	a	young	Male	19.5455	15.6036	37.5833	22.0761	45.8333	27.2858	34.2222	19.2209	49.8182	23.0209	40.8182	24.1032
037_y_m_a_b.jpg	b	young	Male	30.25	22.0871	17.6	17.7776	35.3636	20.578	25.8182	17.1861	40.8182	28.0029	25.5455	18.6995
041_y_m_a_a.jpg	a	young	Male	21.8	21.8622	47.5833	19.081	50.7273	17.0064	53.9	21.1998	53.8	22.4093	49.9091	23.1234
041_y_m_a_b.jpg	b	young	Male	35.6667	24.8718	27.4444	21.2903	52.25	20.2086	37.1	27.6182	49.5833	23.2788	46.2727	23.5206
049_y_m_a_a.jpg	a	young	Male	22.6667	16.4335	30	25.3951	38.0833	24.452	28.5556	14.3362	47	23.5466	26.7273	16.4383
049_y_m_a_b.jpg	b	young	Male	32	24.3311	26.8	17.7626	45.5833	15.7276	24	18.5365	40.6	23.1094	31.6154	17.8491
057_y_m_a_a.jpg	a	young	Male	24.1818	19.1772	42.2727	27.2033	36.4545	19.1121	40.1	20.069	49.9091	21.7736	50.0909	30.6576
057_y_m_a_b.jpg	b	young	Male	33.6667	25.1155	40.4444	31.0407	47.3636	19.242	37.6364	23.0359	51.5	19.8844	47.5	14.4254
062_y_m_a_a.jpg	a	young	Male	27.7273	25.3854	53.25	31.0282	40.9167	28.3243	37.2222	18.424	54.2	25.2182	48.4167	29.3984
062_y_m_a_b.jpg	b	young	Male	41.1818	23.099	36.9091	27.682	43.7273	15.3173	33.0909	21.5195	52	21.4009	33.2727	22.4637
066_y_m_a_a.jpg	a	young	Male	17.1818	18.3511	30.3333	22.8486	30.0909	18.1904	22.9	18.5499	41.4	23.3248	30.9091	21.8424
066_y_m_a_b.jpg	b	young	Male	26	22.5671	26.3333	21.0238	34.4545	20.4224	24.6667	21.1803	38.6364	26.9157	32.9167	26.7971
072_y_m_a_a.jpg	a	young	Male	20.9	20.3276	45.5455	27.1785	41	18.0997	39.2	23.4606	54.3	20.3145	47.1667	24.983
072_y_m_a_b.jpg	b	young	Male	40.5833	23.8612	46.3	27.729	43.5833	25.3895	47.5	15.3496	52.8333	17.908	28.8182	22.1125
081_y_m_a_a.jpg	a	young	Male	23.3636	18.7525	38.3333	23.0033	33.7273	18.7462	25.5	14.478	42.6	24.8023	30.5	20.4606
081_y_m_a_b.jpg	b	young	Male	32.8333	23.9273	38.2	27.0547	29.4167	20.4515	23.6	14.1201	40.8182	17.854	17.8333	18.115
089_y_m_a_a.jpg	a	young	Male	28.8333	18.5072	50.6364	27.8326	42.6364	20.0912	41.3	21.5718	53.7273	20.3622	46.2727	25.6011
089_y_m_a_b.jpg	b	young	Male	46.8333	24.7674	42.4444	27.2631	36.8182	22.1757	28.2727	24.6012	48.4	24.8873	39.6364	25.1288
099_y_m_a_a.jpg	a	young	Male	25.3333	24.6146	27.25	21.6506	39.5833	25.8438	28.8	18.8727	43.4	21.1776	39.5	21.3137
099_y_m_a_b.jpg	b	young	Male	38.8333	27.9019	35.5	22.3122	42.8182	22.3509	31.7	15.9168	51.8333	22.8864	35.0909	23.864
105_y_m_a_a.jpg	a	young	Male	26.75	21.872	39.25	27.664	38.7273	18.3798	34.4	22.292	43.4	21.0618	33.0833	18.2879
105_y_m_a_b.jpg	b	young	Male	33.9167	27.0873	29.8	29.8507	41.0833	15.5064	26.8	17.7814	43.4545	18.5384	24.1667	17.9638
109_y_m_a_a.jpg	a	young	Male	25.9	19.8911	42.3077	23.4783	51.2727	19.7134	41.1	19.5075	57.1111	16.937	50.3333	25.4249
109_y_m_a_b.jpg	b	young	Male	30.5	26.3076	37.3	31.0986	43.7692	15.6	33.1111	22.0706	54	20.5475	41.5	23.0904
114_y_m_a_a.jpg	a	young	Male	22.75	18.6212	35.1818	24.3919	31.2727	14.5333	27.4	20.1946	38.6	26.6966	27.9167	28.849
114_y_m_a_b.jpg	b	young	Male	27.0909	24.8775	31	31.1929	36.9091	20.226	27.0909	18.6518	32.5455	25.0574	28.25	20.0324
119_y_m_a_a.jpg	a	young	Male	24.6364	20.6846	52.7273	29.0692	40	19.2826	36	19.2484	43.1	17.9904	43.5455	26.89
119_y_m_a_b.jpg	b	young	Male	39.4167	29.1905	39	23.9285	38.4545	24.8248	27.1818	17.6398	34.4	25.9581	23.0833	17.789
123_y_m_a_a.jpg	a	young	Male	17.1818	25.8721	40.0909	25.583	34.5455	18.9439	30.6	18.9397	43.6364	25.327	37.5455	28.7519
123_y_m_a_b.jpg	b	young	Male	36.4167	23.7198	34.1111	24.7308	42.0909	18.4253	31.8182	20.4979	39.7273	17.9226	33.6667	22.8646
127_y_m_a_a.jpg	a	young	Male	17.9091	15.649	50.5833	28.6403	50.0833	15.3472	39.4	17.84	44.1818	24.6893	40.5	21.9203
127_y_m_a_b.jpg	b	young	Male	39.1667	19.4601	38.8889	17.6029	41.3636	23.5129	35.1818	23.06	40.5455	21.2008	35.8333	24.5128
135_y_m_a_a.jpg	a	young	Male	12.3333	16.4169	20.5455	21.7916	28.2727	24.9483	20	20.2793	43.8	24.5936	23.25	24.0005
135_y_m_a_b.jpg	b	young	Male	17.9167	19.0953	12.3333	13.3135	22.6364	21.6715	26.1818	18.584	38.2727	18.5693	19.8182	19.934
144_y_m_a_a.jpg	a	young	Male	35.6667	26.0256	68.6667	27.5725	49	24.735	38.5556	21.5529	52.4545	18.646	59	20.3421
144_y_m_a_b.jpg	b	young	Male	43.9091	28.0266	58.1818	29.7618	49.75	30.2629	45.5	26.5801	58.0833	24.6003	50.2727	24.8237
147_y_m_a_a.jpg	a	young	Male	14.3	17.4104	48.5455	25.5279	38	16.6373	34.9	18.6931	51.2	29.1387	60.0909	31.082
147_y_m_a_b.jpg	b	young	Male	39	23.1987	40.6667	26.7535	47.0909	17.3404	31.4545	21.0873	46	20.4885	41.0833	22.8651
153_y_m_a_a.jpg	a	young	Male	21.9091	21.026	53.5	29.7214	38.9091	21.2671	41.6	24.7036	44.5455	24.2089	40.4545	24.9534
153_y_m_a_b.jpg	b	young	Male	33.5833	27.7864	42.7	22.6669	28.9	21.2679	26.0833	16.0026	44.1818	27.3672	20.1667	16.4418
160_y_m_a_a.jpg	a	young	Male	25.4545	21.5098	25.0909	20.8636	44.4545	21.0967	35	21.0977	51.7273	20.4602	45.3636	29.0182
160_y_m_a_b.jpg	b	young	Male	31	23.073	29	20.2045	48	16.3095	30.0909	16.855	48.7	25.0335	34.7692	27.096
167_y_m_a_a.jpg	a	young	Male	15.0909	12.8721	30.5833	27.047	43.2727	21.7122	26.3	18.6431	47.3636	23.5044	32.3636	18.7311
167_y_m_a_b.jpg	b	young	Male	26.9167	24.744	22	21.5174	47.7273	15.3759	23.3636	20.0762	43.0909	18.447	23.25	18.1014
170_y_m_a_a.jpg	a	young	Male	14.3636	17.4887	38.9091	29.3614	37.25	21.6002	26.8889	16.1435	42.4444	21.4774	38.9167	28.289
170_y_m_a_b.jpg	b	young	Male	30.25	28.159	36.8	27.9157	40.5455	20.8776	31.5455	20.6899	43.4545	23.7671	21.0833	19.6721
175_y_m_a_a.jpg	a	young	Male	19.6364	16.7408	58.6364	26.733	42.3636	14.8746	50.3636	14.0234	47.7	20.7045	40.7273	18.2816
175_y_m_a_b.jpg	b	young	Male	34.0909	24.7809	37.6364	17.9793	41	25.6444	43.2	28.1141	57.25	15.2919	36.0909	23.9727
010_y_f_a_a.jpg	a	young	Female	56.4545	22.2007	53.3333	15.9336	53	18.0831	39.4444	21.7032	51.8	22.3597	37.1818	23.8446
010_y_f_a_b.jpg	b	young	Female	34.1818	29.2603	48.6	22.5497	41.6667	24.3472	27.4	16.0361	36.1667	25.3909	34.0833	19.5888
020_y_f_a_a.jpg	a	young	Female	57.6	32.0111	55.8333	20.3953	51.3333	23.3913	56.8	25.3982	61.6667	18.3848	50.75	30.0609
020_y_f_a_b.jpg	b	young	Female	58.5833	16.3733	52.8889	25.1219	53.3333	24.351	39.8	20.0765	55.5833	18.8364	36.6364	20.7859
022_y_f_a_a.jpg	a	young	Female	30.1667	19.1351	56.4545	17.2822	43.4545	25.1291	41.8	22.0746	58.8889	23.5077	49.0833	24.8978
022_y_f_a_b.jpg	b	young	Female	52.3636	24.8607	36.8	24.4668	48.75	27.8604	36.0909	16.7	57	22.5389	45.0909	27.3073
028_y_f_a_a.jpg	a	young	Female	43.5	14.3051	52.3636	20.0263	54.9	7.325	53.7273	17.3383	56.6	20.7643	54.0909	21.7736
028_y_f_a_b.jpg	b	young	Female	43.75	28.2107	39.2222	25.1385	44.9091	25.54	40.7273	26.522	55.5	20.1288	36.6667	26.1302
034_y_f_a_a.jpg	a	young	Female	17.7273	17.1994	32.6667	23.0151	31.7273	18.7941	34.6364	20.0762	44.2727	27.474	38.8182	20.7066
034_y_f_a_b.jpg	b	young	Female	26.6667	21.6011	18.5556	21.5123	33.9091	22.6471	28.5833	25.3895	43.9	22.1131	30.9231	22.0774
040_y_f_a_a.jpg	a	young	Female	58.4545	25.2443	67.8182	14.3723	66.0909	20.3246	50.2	21.6014	59.6667	19.2094	52.4167	29.8465
040_y_f_a_b.jpg	b	young	Female	55.4167	24.9416	49.9	27.8785	49.9167	22.1255	41.3	13.4334	57.5455	22.3891	35.9091	21.6908
048_y_f_a_a.jpg	a	young	Female	48.2727	29.7761	59.9231	21.9638	51.25	21.9011	41.6667	22.7046	43.5	22.9843	29.1818	19.1615
048_y_f_a_b.jpg	b	young	Female	33.75	21.2137	34	28.4019	37.9091	28.9671	31.6364	13.8512	39.3636	23.4234	23.5833	20.9825
054_y_f_a_a.jpg	a	young	Female	50	23.8202	54.25	25.0821	46.4545	15.8074	39	21.2237	50.8182	22.3196	46.8182	26.6826
054_y_f_a_b.jpg	b	young	Female	52.8182	28.0778	43.8182	30.9736	45.5	20.6332	37.0909	20.5838	47.9	23.1154	31.3846	16.7458
063_y_f_a_a.jpg	a	young	Female	39.6667	21.7311	44.4	17.8587	51	19.8586	46.5556	19.3139	53.9	27.9859	51.6667	28.295
063_y_f_a_b.jpg	b	young	Female	43.9167	26.4934	35.1	26.0318	49.3636	19.0014	32.1818	16.1482	52.2	23.4464	47.9167	22.9682
069_y_f_a_a.jpg	a	young	Female	42.8333	23.7251	48.0909	25.4851	50.9167	23.5428	52.4444	27.5096	51.8	19.1706	57.4545	29.8575
069_y_f_a_b.jpg	b	young	Female	58.6667	18.4111	49.7	33.1664	48.9091	29.1083	34.25	22.0665	51.6667	21.2916	37.8182	25.3054
071_y_f_a_a.jpg	a	young	Female	20.5	17.9397	43.1667	24.2368	40.9091	15.4043	38.3	17.8764	48.8	26.2077	43.7273	30.8386
071_y_f_a_b.jpg	b	young	Female	30	24.6503	23.1111	18.7446	39.9091	28.2647	32.1818	20.1038	37.9091	21.7277	23.5455	23.1748
085_y_f_a_a.jpg	a	young	Female	13.4545	19.0072	42.5455	24.9975	39.8182	20.2228	41.7	23.3954	50.8	18.8786	42.9167	25.5786
085_y_f_a_b.jpg	b	young	Female	31.0833	23.5814	28.6	18.0629	41.1818	21.1888	30.6364	22.2498	47.0909	24.4436	35.9167	17.707
090_y_f_a_a.jpg	a	young	Female	39.6667	18.0924	47.2	24.1099	49.4167	21.3689	36.5556	20.5737	45.3	25.7123	41.4545	17.5975
090_y_f_a_b.jpg	b	young	Female	33.25	23.5917	29	24.6351	36.0833	26.9122	23.5455	16.1454	46.6364	28.3629	32.3333	21.1245
098_y_f_a_a.jpg	a	young	Female	37.8182	22.2163	63.4	15.3275	50.7273	15.6147	44.6364	18.6669	53.0909	21.5938	38.9091	28.8564
098_y_f_a_b.jpg	b	young	Female	47.5455	17.5235	54	24.363	58.7273	24.0753	40.6364	21.0821	57.2	22.4984	43.3846	19.6746
101_y_f_a_a.jpg	a	young	Female	33.5455	23.9222	51.5455	19.1644	53.1667	19.2393	45.9	16.017	58.4	27.5649	53.3636	23.2864
101_y_f_a_b.jpg	b	young	Female	39	21.4196	40.9091	24.5498	53.8182	27.2206	43.8182	19.5797	51.9091	22.3985	36.4167	27.3079
106_y_f_a_a.jpg	a	young	Female	52.5455	26.2044	57.3077	26.697	56.8333	20.1035	39.8889	32.363	52.3	22.1161	50.0833	33.4432
106_y_f_a_b.jpg	b	young	Female	57.8182	26.3394	56.3636	23.1269	50.4545	25.8626	37.0909	20.3541	44.4545	26.2502	42.8333	22.739
115_y_f_a_a.jpg	a	young	Female	67	22.555	61.8	16.6052	62	20.7413	48.5	23.6279	60	23.9815	51.6364	25.3743
115_y_f_a_b.jpg	b	young	Female	58.6667	28.9618	47.6667	26.0624	59.25	25.8848	47.7	22.1362	54.3	23.1855	38.3333	22.7849
125_y_f_a_a.jpg	a	young	Female	9	11.7047	29.6364	17.4085	41.75	20.7019	31.7	24.0603	51.2	23.0545	41.8182	28.3472
125_y_f_a_b.jpg	b	young	Female	25.6364	22.9838	19.1	21.2208	33	28.6182	23.4545	20.8104	42.0909	21.375	30.8333	24.6939
132_y_f_a_a.jpg	a	young	Female	32.7778	25.8398	51.6923	21.796	46.5455	20.4713	41.5	17.161	56.1	18.711	58	26.2107
132_y_f_a_b.jpg	b	young	Female	41.0909	25.0458	49.9091	24.0477	41.8182	28.0279	46.6	13.5253	61.2	25.3763	47.1667	27.6729
134_y_f_a_a.jpg	a	young	Female	45.9167	29.8099	51.7273	17.0651	57.8182	19.1354	48.7	18.8565	58.5	23.0374	45.5	30.557
134_y_f_a_b.jpg	b	young	Female	42.5833	30.1042	53.1111	28.2287	46.5455	24.242	40.7273	20.4846	51.7273	23.1909	34.9091	26.0786
140_y_f_a_a.jpg	a	young	Female	24.9091	21.5288	40.6364	27.8613	41.5833	16.9944	31.5556	28.1385	45.7	23.3906	29.6364	19.1064
140_y_f_a_b.jpg	b	young	Female	45.3636	24.9811	49.7273	26.4579	51.9091	25.8861	35.2727	20.1796	52.9	22.6787	30.75	16.3436
150_y_f_a_a.jpg	a	young	Female	40.1667	24.6091	51.5455	21.2761	60.7273	28.1037	47	28.3619	50	24.1016	48.8182	26.271
150_y_f_a_b.jpg	b	young	Female	43.8333	34.5381	40.7	25.5867	48.5455	25.145	43.4545	16.1082	53.6364	22.9838	38.3636	24.4306
152_y_f_a_a.jpg	a	young	Female	55.3636	30.3324	65.8182	17.7754	50.3636	19.582	49.5	18.6503	54.4	25.6567	52.5455	17.1835
152_y_f_a_b.jpg	b	young	Female	57.5833	20.2595	40.2	33.4591	54.6	24.9364	37	19.9134	60.6	19.648	36.3333	21.176
162_y_f_a_a.jpg	a	young	Female	28.0909	19.6797	47.8182	20.2673	45.4545	17.6599	43.4444	22.5284	46.9	26.2909	38.9091	22.0248
162_y_f_a_b.jpg	b	young	Female	38.9167	27.161	38	18.8414	42.25	30.6835	25.9	20.1188	43.7	25.1398	29.1667	21.1996
163_y_f_a_a.jpg	a	young	Female	45.2727	29.083	57.6154	23.1572	48.4167	21.4411	39.2222	27.2019	50.7	23.6739	45.6364	17.9347
163_y_f_a_b.jpg	b	young	Female	41.5833	26.1932	56.8889	24.8367	44.8182	30.6653	28.4545	21.7594	32.6364	25.323	26.3333	21.58
171_y_f_a_a.jpg	a	young	Female	24	13.1233	52.25	14.7286	50.0909	22.6471	44.9	17.6097	53.3	23.9214	47.3636	20.9679
171_y_f_a_b.jpg	b	young	Female	38.3333	21.2061	33.4444	24.4034	40.1818	22.3106	36.1818	24.1115	48.75	22.2552	24.7273	21.923
173_y_f_a_a.jpg	a	young	Female	27.1818	25.5179	56.3333	16.7078	46.3636	20.7281	45.9	20.9521	58.4167	20.255	67	30.804
173_y_f_a_b.jpg	b	young	Female	40.75	21.2822	40.2222	24.082	47.0909	13.7	48.4545	22.7612	65	19.9276	57	17.2574
177_y_f_a_a.jpg	a	young	Female	28.6364	20.7088	44.4545	19.5569	51.8333	28.3832	51	14.2127	44.4444	29.6147	43.4545	24.6551
177_y_f_a_b.jpg	b	young	Female	35.3333	23.2392	39.2222	28.1282	28.1818	26.9623	26.0909	21.4357	35.2727	23.234	28.4167	22.7215
182_y_f_a_a.jpg	a	young	Female	37.5833	17.6195	58.1818	20.3608	47.6364	12.0272	42.3636	19.77	53.6	27.2038	41.25	23.8141
182_y_f_a_b.jpg	b	young	Female	30.3333	27.1003	42.2222	31.0716	36.5	27.5961	29.7	19.8609	37.2	23.1459	27.5	20.7079
007_m_m_a_a.jpg	a	middleaed	Male	7.75	10.1992	15.6364	16.0952	23.6364	22.4512	19	14.6211	41.8889	22.1102	21.1538	18.064
007_m_m_a_b.jpg	b	middleaed	Male	26.75	24.0194	21.5	18.3923	20.7273	19.5402	18.6364	12.0605	34.6364	21.0061	18.8182	16.8275
014_m_m_a_a.jpg	a	middleaed	Male	14.5833	14.1129	19.9	19.0464	34.0833	23.4694	22.7778	15.8491	41.9	21.6202	28.3333	24.4701
014_m_m_a_b.jpg	b	middleaed	Male	22.1818	19.6154	30.6667	16.3401	30.8182	18.4489	21.7273	21.3358	41.2	21.1702	16.25	13.9943
026_m_m_a_a.jpg	a	middleaed	Male	15.8182	14.0415	21.8333	15.3731	38.4167	20.5314	31.4444	18.4059	43	23.7534	38.4545	29.3236
026_m_m_a_b.jpg	b	middleaed	Male	23.7273	20.8571	22	19.985	26	16.2234	23.6364	13.7424	52.6364	21.5883	34.3333	25.7093
032_m_m_a_a.jpg	a	middleaed	Male	16.5833	17.4432	20.0833	15.8255	29.8333	20.3149	26.2222	17.2683	45.4	20.0843	34	22.7396
032_m_m_a_b.jpg	b	middleaed	Male	24.9167	20.8695	15.5556	14.9257	38.4167	18.5935	31.1	19.0989	49.5833	18.1732	25.1	20.787
038_m_m_a_a.jpg	a	middleaed	Male	21.4	16.5341	29.75	19.2029	46.4545	13.9453	43.4	22.0363	54.8	21.2749	52.0833	28.7227
038_m_m_a_b.jpg	b	middleaed	Male	32.5455	31.475	17.4	21.277	33.9091	15.8837	29.7273	16.359	50.0833	27.6848	35.0909	22.1561
045_m_m_a_a.jpg	a	middleaed	Male	8.5	10.1571	14	13.1564	26.5455	18.9334	18.7	18.3609	39.25	24.3091	24.8	20.4059
045_m_m_a_b.jpg	b	middleaed	Male	22.6667	20.7028	16.8	17.9988	25	18.684	16.8182	17.2384	35.3636	23.2132	23.0833	17.6401
051_m_m_a_a.jpg	a	middleaed	Male	10.0909	15.5785	25.4545	22.1014	41.9091	21.3516	33.5	17.2707	47.0909	21.501	43.9091	24.0061
051_m_m_a_b.jpg	b	middleaed	Male	26.1667	23.2685	20.1111	19.0029	30.3636	19.0802	29.6364	11.0297	40.4545	20.4664	18.4167	18.8026
056_m_m_a_a.jpg	a	middleaed	Male	20.6364	15.3836	21.9167	17.9264	30.4545	15.7058	27.8	19.1242	46.6	22.0565	28.1667	28.2129
056_m_m_a_b.jpg	b	middleaed	Male	27.9091	24.562	13.7	17.3849	32.7273	18.3581	16.9091	11.6829	46.7273	17.1178	15.1667	15.6776
058_m_m_a_a.jpg	a	middleaed	Male	18.5385	19.9776	26	18.3248	34.9167	19.0237	31.6667	16.0312	43.6667	27.6496	36.9167	20.0792
058_m_m_a_b.jpg	b	middleaed	Male	28.6364	23.6443	30.4545	21.5795	35.7273	19.9804	27.0909	17.1082	50.2	20.7514	40.1667	23.7901
068_m_m_a_a.jpg	a	middleaed	Male	12.1667	13.7301	25.8	18.6893	33.5833	18.2082	31.1111	16.1202	48.7778	21.8619	33.1667	21.6578
068_m_m_a_b.jpg	b	middleaed	Male	23.6667	22.6046	20.3333	17.4929	22.3636	20.6169	27.0909	15.8269	40.9091	22.3672	28.1818	21.9126
070_m_m_a_a.jpg	a	middleaed	Male	12.4	12.2945	19.5455	18.8699	37.9167	17.6659	33.1111	18.169	44	23.3067	46.9	18.7228
070_m_m_a_b.jpg	b	middleaed	Male	25.1667	22.0695	24.6	18.3739	34.0833	19.4537	27	23.9351	50.3333	21.0535	29.3846	19.2117
077_m_m_a_a.jpg	a	middleaed	Male	9.9	12.1331	24.4	14.2064	29.9091	21.7461	22	16.7398	41.9	22.0376	28.1818	22.9164
077_m_m_a_b.jpg	b	middleaed	Male	22.8333	30.0207	17.3	21.396	30.7273	23.1434	18.9091	14.4184	42.0909	15.9402	19.1667	18.6247
082_m_m_a_a.jpg	a	middleaed	Male	9.41667	11.0902	22	14.7513	30	24.1891	27.8182	16.6842	45.6	20.3754	30.7273	15.0073
082_m_m_a_b.jpg	b	middleaed	Male	22.75	20.5565	22	19.3907	24.8333	18.3691	24.1	20.2783	31.6	21.8845	23.3636	20.3876
087_m_m_a_a.jpg	a	middleaed	Male	13.7	12.3743	28.4167	19.4817	35.8182	13.5264	39.4	26.1202	43.2	23.8365	45.2727	28.9727
087_m_m_a_b.jpg	b	middleaed	Male	29.25	21.9011	17.5	15.1895	28.3636	18.3372	29.8182	21.7937	36.2727	26.6462	28.3636	29.0044
092_m_m_a_a.jpg	a	middleaed	Male	16.4545	31.2965	20.4167	20.0475	32	24.4949	23.8	17.7439	41	24.9149	21.9167	17.9112
092_m_m_a_b.jpg	b	middleaed	Male	27.25	21.8096	17.4	16.7942	15.5	13.9702	18.75	12.0161	39.5	20.6788	13.5833	15.0421
094_m_m_a_a.jpg	a	middleaed	Male	21.4545	15.4037	29.6667	26.2898	36.9167	14.6626	38.8	11.717	42	20.3027	38.6	30.1927
094_m_m_a_b.jpg	b	middleaed	Male	31.0833	25.325	20	22.1303	34.6667	18.0622	29	16.3503	52.5455	19.8563	28.3333	20.0015
104_m_m_a_a.jpg	a	middleaed	Male	17.9167	19.6166	15.4	14.1908	44.7273	21.256	36.0909	16.5979	37.3	27.9525	32.9167	20.237
104_m_m_a_b.jpg	b	middleaed	Male	26.0909	21.7874	27.0909	23.7295	30.3333	18.2773	30.8	17.1516	48.0909	17.0555	27.5833	19.7873
108_m_m_a_a.jpg	a	middleaed	Male	20.1818	18.5893	24.7273	17.0005	33.5455	17.1544	32.0909	19.4959	43.2	23.8178	24.9091	16.1025
108_m_m_a_b.jpg	b	middleaed	Male	25.4545	21.4446	34.2	23.3847	25.1	17.8042	24.1818	17.8819	32.1	23.3069	8.75	12.0312
116_m_m_a_a.jpg	a	middleaed	Male	13.1818	17.1045	21.5455	19.2321	35.0909	13.4272	29.3	18.6551	44.2	24.0915	20.8333	19.6554
116_m_m_a_b.jpg	b	middleaed	Male	30.25	28.1913	21.2	19.7473	30.0909	17.7564	18.5455	18.3541	38.8333	26.635	13.8182	15.3416
126_m_m_a_a.jpg	a	middleaed	Male	18.4545	19.5467	27.2727	22.5215	42.0909	19.1961	31.8	19.3092	47.7	20.1497	30.3636	18.7684
126_m_m_a_b.jpg	b	middleaed	Male	21.1667	20.4176	32.6667	24	30.4545	19.7857	31	20.6828	50.3636	20.8388	21.1667	15.9478
136_m_m_a_a.jpg	a	middleaed	Male	13.25	10.7037	16.9091	17.7226	27.4545	16.1887	21	15.7762	35	24.404	25.0909	17.1607
136_m_m_a_b.jpg	b	middleaed	Male	15.8182	19.8737	18.6	17.1477	18.25	19.2218	24	12.8323	30.6	22.3169	13.1538	12.9412
142_m_m_a_a.jpg	a	middleaed	Male	16.7778	15.5867	27.6667	21.6725	34.3077	20.2706	28.8889	21.0917	44.8	27.0012	29.0909	21.1729
142_m_m_a_b.jpg	b	middleaed	Male	26.4545	22.5227	29.9	26.8636	25.1	19.2957	24.9167	17.977	34.9	25.309	34.25	21.5327
149_m_m_a_a.jpg	a	middleaed	Male	20.9167	20.1786	28.0833	22.6011	34.7273	18.7888	33.9	15.4808	44.5	20.1618	30.9167	21.4665
149_m_m_a_b.jpg	b	middleaed	Male	26.25	23.5029	23	21.9342	31.3636	21.9421	28.7273	17.9393	41.4545	17.4549	34.9167	17.8807
155_m_m_a_a.jpg	a	middleaed	Male	11.75	14.0979	19.7273	15.0538	30.9091	17.6321	33.9091	16.7479	45.5455	23.9431	28.7	24.8643
155_m_m_a_b.jpg	b	middleaed	Male	22.75	20.6843	20	24.363	19.7273	16.3346	20.9091	19.0182	39.6	16.7611	23.4167	17.3648
159_m_m_a_a.jpg	a	middleaed	Male	21.5833	20.8913	38	26.4407	43.6364	19.9312	41.7	22.8038	48.8	16.2193	34.8182	20.8462
159_m_m_a_b.jpg	b	middleaed	Male	32.75	21.5412	26.5556	24.1304	36.8182	19.2812	25.5833	19.8698	40.3636	29.0973	28.25	20.0822
165_m_m_a_a.jpg	a	middleaed	Male	18.1	18.947	25.5833	23.0077	42.2727	18.0061	40.5	18.2772	38.8889	23.9397	33.5385	27.2171
165_m_m_a_b.jpg	b	middleaed	Male	26.5455	23.3425	24	21.9646	36.25	21.8762	29.8	17.0476	43.75	20.6183	30	19.3907
169_m_m_a_a.jpg	a	middleaed	Male	18.0833	19.1	22.9091	20.4522	31.7273	21.9002	26.9	17.0258	36.8889	24.7308	22.25	16.8584
169_m_m_a_b.jpg	b	middleaed	Male	24.5	20.642	30.3333	23.8118	30	17.8157	26.2727	19.6575	29.75	24.6618	21.5833	20.0021
178_m_m_a_a.jpg	a	middleaed	Male	16.75	17.0674	36.4167	21.3646	38.3	14.72	36.6364	20.7136	39.6667	21.1932	27.9	20.2893
178_m_m_a_b.jpg	b	middleaed	Male	32.7273	24.2779	35.4	22.8629	39.1818	18.9199	21.25	15.4985	39.2727	21.827	29	21.6837
179_m_m_a_a.jpg	a	middleaed	Male	14.2222	10.533	32.3846	20.4595	39.1667	16.8244	29.5556	13.9204	53.4	22.9405	28.4545	17.9742
179_m_m_a_b.jpg	b	middleaed	Male	26	22.7316	28.7	19.4539	31.4545	19.0964	29	16.5348	36.5455	20.1115	25.75	17.2896
006_m_f_a_a.jpg	a	middleaed	Female	41.1667	22.6909	58.1818	24.2521	60.0909	15.9528	46.4545	22.3668	50.6	18.392	42.2727	24.3355
006_m_f_a_b.jpg	b	middleaed	Female	38.75	24.1929	47.2	35.4489	45.9091	31.3511	39.6364	20.7233	53.9	21.1894	42	30.3375
011_m_f_a_a.jpg	a	middleaed	Female	15.8182	14.3375	35.3333	20.6808	42.5833	26.7393	32.6	20.3972	39.8182	23.5364	38.2727	21.19
011_m_f_a_b.jpg	b	middleaed	Female	27.3636	21.5141	19.2	23.0642	36.7273	29.1722	28.0909	18.3872	52.5	20.5332	34.6154	19.4145
019_m_f_a_a.jpg	a	middleaed	Female	17.1818	19.5337	38.3636	23.733	46	23.0454	30.2222	17.1302	48	22.7254	23	14.5102
019_m_f_a_b.jpg	b	middleaed	Female	21.5455	20.559	27.9	21.512	32.7273	18.4287	25.2727	18.7408	33.3	18.209	24.0833	20.4604
029_m_f_a_a.jpg	a	middleaed	Female	20.4545	16.0895	31.5	16.8927	34.8462	20.3832	32.3333	15.2315	44.2	22.9628	41.6364	23.754
029_m_f_a_b.jpg	b	middleaed	Female	28.3333	23.9444	31.4444	17.8333	39.9167	27.6026	27.8182	20.493	35.9091	28.0979	19.25	16.9498
035_m_f_a_a.jpg	a	middleaed	Female	6.27273	6.63462	20.1818	16.3696	22.0909	17.1782	18.5455	15.3712	42.8889	25.8672	32.5	21.3051
035_m_f_a_b.jpg	b	middleaed	Female	16.5833	13.9118	11.4	14.9384	18	17.3886	17.1818	13.4746	31.4545	20.0567	15.3333	14.3485
043_m_f_a_a.jpg	a	middleaed	Female	5.72727	7.68233	22.9091	19.4034	40.8182	13.4448	20.4545	16.5733	38.4	25.8121	21.4545	16.7891
043_m_f_a_b.jpg	b	middleaed	Female	19.25	18.0359	20.5	19.5349	28.4545	25.6841	13.6364	15.0151	33.1667	21.3236	20.8182	15.8481
050_m_f_a_a.jpg	a	middleaed	Female	18.8182	19.3691	34.6154	20.7948	50.1818	19.467	38.1	27.2415	45.2	20.7621	34.5	18.4711
050_m_f_a_b.jpg	b	middleaed	Female	23.8182	19.8233	26.8	20.2638	24.75	24.6323	26.5455	19.9016	36.3636	23.3721	23	21.1617
052_m_f_a_a.jpg	a	middleaed	Female	20.25	18.5086	33.8333	18.5856	49.3636	20.7136	29.7	17.8391	51.1	23.8861	32	17.6918
052_m_f_a_b.jpg	b	middleaed	Female	25.1818	22.9383	30.2727	18.5477	33.8	21.1912	26.5	15.4479	37.5455	25.0534	31.5833	21.3263
061_m_f_a_a.jpg	a	middleaed	Female	29.1818	25.8411	56.75	23.898	49.2727	11.2702	49.9	14.5101	52.1818	22.4358	52.9091	22.2011
061_m_f_a_b.jpg	b	middleaed	Female	47.0833	19.9155	54.9	28.0256	45.9091	25.0138	42.5455	21.7134	50.7	21.9041	39.1538	24.5827
064_m_f_a_a.jpg	a	middleaed	Female	16.3333	15.5525	38.7273	25.4994	39.9091	10.4542	47.3	17.3208	53.7	26.4829	31.5455	23.7965
064_m_f_a_b.jpg	b	middleaed	Female	31.9167	25.2351	26.5556	14.2576	38	16.0312	36.7	22.3112	40.1818	21.9992	23.1818	21.3252
073_m_f_a_a.jpg	a	middleaed	Female	24.4545	25.6061	46.4545	18.9703	32.3636	20.2745	45.3	20.2323	44	25.7924	30.5	19.9568
073_m_f_a_b.jpg	b	middleaed	Female	31.6364	23.2434	40.9	29.8383	42.6667	29.0746	34.7	26.4619	37.7	21.1348	31.1538	16.5824
080_m_f_a_a.jpg	a	middleaed	Female	18.6364	18.9012	46	12.8996	43.8182	14.4694	43.5455	10.3765	51.2	26.1865	36.8182	23.2844
080_m_f_a_b.jpg	b	middleaed	Female	32	19.6515	35	19.6977	34.6364	28.479	23.9091	16.5315	57.2727	21.7214	38.1667	21.9662
084_m_f_a_a.jpg	a	middleaed	Female	7.09091	7.02075	20.4167	15.3354	29.4545	20.2255	28.6364	20.0263	41.6	24.4686	22.6364	19.1273
084_m_f_a_b.jpg	b	middleaed	Female	21.4167	18.3969	24.6667	20.567	23.7273	20.2044	16.6364	12.8862	32.3636	23.4106	15	14.0071
093_m_f_a_a.jpg	a	middleaed	Female	12	11.568	21.25	23.5222	32.0909	16.5315	23.4	14.7211	43.1818	19.8384	36.7273	19.3602
093_m_f_a_b.jpg	b	middleaed	Female	24.1818	22.0944	35.8	21.519	27.7273	25.1559	17	12.2066	43.1818	19.8586	31.0833	25.2027
097_m_f_a_a.jpg	a	middleaed	Female	15	17.4483	33.5385	22.6702	31.9091	20.671	28.9091	16.646	42.1	26.9957	33.8182	21.3393
097_m_f_a_b.jpg	b	middleaed	Female	22.5455	22.4783	25.4	19.9789	15	12.4316	39.3	16.7136	37.6364	21.6299	17.75	18.2514
103_m_f_a_a.jpg	a	middleaed	Female	24.6667	23.8912	35.7273	19.0897	45.9091	20.0372	35.8	17.1257	39.8889	23.0187	30.6667	20.178
103_m_f_a_b.jpg	b	middleaed	Female	21.0833	21.5763	32	22.0504	37.9091	26.0402	26.3636	21.3975	28.5	21.2282	23.0909	14.4669
111_m_f_a_a.jpg	a	middleaed	Female	20.9091	20.608	49.5	17.6094	33.5833	20.407	31.8889	17.9822	41.6	25.2199	40.9091	18.1849
111_m_f_a_b.jpg	b	middleaed	Female	30	24.1586	48	28.3078	38.9091	26.113	25.0909	17.9914	37.9	24.7766	31.9167	23.1417
113_m_f_a_a.jpg	a	middleaed	Female	20.8462	18.6809	49.6364	26.3031	37.8333	16.508	46.6	25.1184	47.2	26.1992	32.0909	16.5557
113_m_f_a_b.jpg	b	middleaed	Female	29.9167	22.0225	34.7	25.0113	42.5455	24.2378	27.1818	19.959	38.5	21.1252	27.0909	21.7553
117_m_f_a_a.jpg	a	middleaed	Female	27.25	17.4102	50.8182	17.4403	56.3333	17.3223	46.3333	22.655	61.2	19.3896	55.6667	24.8059
117_m_f_a_b.jpg	b	middleaed	Female	35	24.5209	32.75	24.3882	51.2727	24.6823	36.4545	22.2232	65.25	13.178	46.1818	24.5349
122_m_f_a_a.jpg	a	middleaed	Female	11.3	15.4492	28.75	23.4254	21.7	18.6967	22.2727	16.224	36.9	25.3441	19.3636	16.7049
122_m_f_a_b.jpg	b	middleaed	Female	16.0833	17.3439	21.9	19.8799	24.9091	17.8911	22.8333	18.517	31.4545	21.947	24.0833	25.4967
128_m_f_a_a.jpg	a	middleaed	Female	6.09091	7.39533	29.8182	20.8797	33.3333	22.9003	26.1111	15.9878	49	24.1578	27.8182	19.3743
128_m_f_a_b.jpg	b	middleaed	Female	20.3333	18.5587	21.1	21.226	33.1818	20.4881	20.8182	14.4625	42.1667	21.5948	22	21.429
138_m_f_a_a.jpg	a	middleaed	Female	13.1818	11.4177	34.8462	18.1514	41.5455	19.5416	28	15.2315	42.9	27.8825	31.6364	18.9751
138_m_f_a_b.jpg	b	middleaed	Female	24.3333	19.9924	27.8	19.0018	32.0909	19.7	21.7273	17.2226	43.4545	21.3043	22.1667	15.438
139_m_f_a_a.jpg	a	middleaed	Female	29.8333	21.4554	50.8182	18.9358	63.3636	18.9856	41.1	27.8586	56.6667	19.6469	45.8333	33.828
139_m_f_a_b.jpg	b	middleaed	Female	32.1667	23.8207	39.8	32.2208	44.3636	28.3453	30.7273	12.9545	46.6667	25.7553	36.6364	21.6022
156_m_f_a_a.jpg	a	middleaed	Female	6.45455	7.75066	21.3636	15.4484	34.0909	29.2864	24.7273	17.7881	41.9	19.1221	24	19.4474
156_m_f_a_b.jpg	b	middleaed	Female	13.8333	14.3326	17.2	18.3654	23.9	18.4478	19.4545	17.2532	39.7	20.9711	21.4167	18.8798
157_m_f_a_a.jpg	a	middleaed	Female	18.3636	18.2114	37.8333	15.3139	38.25	22.3449	29.4444	19.3333	49.9	25.2386	44.0909	19.776
157_m_f_a_b.jpg	b	middleaed	Female	29.3333	25.0466	46.8889	19.6433	34.6154	18.237	33.6667	18.6882	45.5455	16.6755	37.5	23.6085
168_m_f_a_a.jpg	a	middleaed	Female	15.25	14.7101	38.3636	20.3974	37.6364	19.6788	41.1	18.1992	51.1	27.1475	28.5	16.0028
168_m_f_a_b.jpg	b	middleaed	Female	29.25	23.6763	21.6	17.9642	38.5833	19.5097	25	17.8761	45.6	20.7268	28.1667	20.4621
180_m_f_a_a.jpg	a	middleaed	Female	12.7273	16.2732	28.2727	23.7154	28.1667	16.1067	23	17.6989	46.1111	21.8142	32.25	27.2067
180_m_f_a_b.jpg	b	middleaed	Female	18.0833	20.0293	19.3	19.1952	22.3636	22.0012	21.3333	16.2443	25.2	20.1814	15.4615	16.3942
004_o_m_a_a.jpg	a	older	Male	7.9	10.8264	32.3333	25.3891	46.9091	21.7323	43.3	16.2757	49.5	23.5053	44.5455	25.9552
004_o_m_a_b.jpg	b	older	Male	30	29.9333	34.3	27.3457	37.9231	19.6064	33.5	17.5895	55.1818	11.0437	33.0833	22.468
015_o_m_a_a.jpg	a	older	Male	7.36364	11.2185	26.6364	30.4114	35.3636	19.7903	20	17.5879	43.3	23.3669	30	22.4944
015_o_m_a_b.jpg	b	older	Male	19.4167	17.4015	12.1111	16.128	20.1667	15.9079	25.2	19.1648	36	28.6356	21	16.6733
018_o_m_a_a.jpg	a	older	Male	10	11.3666	20.6154	15.9715	21	14.7648	22.4444	16.599	42.9	24.8258	24.5455	21.1299
018_o_m_a_b.jpg	b	older	Male	23.75	25.1726	15.6667	17.161	18.8182	16.8037	17.1818	12.2133	31.6667	22.5281	16.6364	21.1909
027_o_m_a_a.jpg	a	older	Male	12.0833	12.602	25.1818	18.7394	30.3636	18.6776	25.9	23.2113	42.2222	19.3957	24	16.2872
027_o_m_a_b.jpg	b	older	Male	21	19.8769	23.1111	21.4851	22.9091	18.1849	18.25	12.5635	44.0833	23.0433	24.7273	19.1002
033_o_m_a_a.jpg	a	older	Male	13.8182	15.6193	22.5	23.4307	43.9091	15.1885	28.1111	11.8369	46.0909	20.7724	51.8	26.4567
033_o_m_a_b.jpg	b	older	Male	30.0833	28.7954	36.2	21.8673	31.6364	15.0351	30.2727	17.6923	49.75	18.9838	34.4545	19.8613
039_o_m_a_a.jpg	a	older	Male	12.3636	14.7667	22.75	20.4989	32.5455	19.7857	23.2	14.9948	38.4	24.4095	20	16.4682
039_o_m_a_b.jpg	b	older	Male	23.9167	21.0258	26.2	18.9021	20.25	15.8752	25.3	21.4012	37.5455	26.9828	18.6667	18.8068
042_o_m_a_a.jpg	a	older	Male	11.8182	15.3024	16.5455	14.7808	37.3636	20.1111	22	18.962	48	23.0072	16.1818	16.1606
042_o_m_a_b.jpg	b	older	Male	16.7273	17.5447	19.6	17.84	18.25	17.9196	19.7273	14.2203	35.9091	25.3158	16.1667	18.3889
046_o_m_a_a.jpg	a	older	Male	9.41667	9.1697	20.1818	17.6001	28.5	20.9263	23.2222	19.8543	46.1	24.324	15.7273	15.6147
046_o_m_a_b.jpg	b	older	Male	21.3333	21.0771	19.7778	17.3405	20.5	16.1104	17.2	13.1217	25.8	19.5834	13.3333	16.773
053_o_m_a_a.jpg	a	older	Male	17.25	22.5877	21.2727	18.7301	28.2727	16.9121	28.6	19.3575	41.5	23.5903	24.4167	19.3365
053_o_m_a_b.jpg	b	older	Male	25.9091	25.5204	22.8182	20.074	28.0833	20.3222	18.2	12.7	36.1818	20.5271	22.4167	18.4413
059_o_m_a_a.jpg	a	older	Male	12.4545	19.608	20.9167	19.5283	28.5833	19.3365	22.5556	16.1331	44	23.9896	12.25	14.5672
059_o_m_a_b.jpg	b	older	Male	19.0909	19.7	28.6	19.9511	17.8182	14.1267	17.4167	17.0692	34.8	19.3264	14.9167	18.9902
065_o_m_a_a.jpg	a	older	Male	10.3636	14.3197	23	27.9545	35.2727	20.3376	29.1	21.6715	41.2	24.3256	22.9167	20.7077
065_o_m_a_b.jpg	b	older	Male	24	20.163	28.1	17.3106	21.8462	18.0224	20	11.9815	33.5455	22.0425	13.75	15.1485
074_o_m_a_a.jpg	a	older	Male	9.72727	12.9081	16.75	15.0098	40.0909	17.3693	22.4	16.8008	41.6364	22.8441	14.1818	14.4487
074_o_m_a_b.jpg	b	older	Male	18	18.9737	24.5455	26.4475	17.8333	11.1749	20.2	14.3279	25.6364	17.996	9.25	10.1455
076_o_m_a_a.jpg	a	older	Male	7.63636	10.8284	19.4545	23.964	25.9167	17.391	28.6667	18.1659	39.3	24.7164	22.1818	16.4974
076_o_m_a_b.jpg	b	older	Male	23	19.5774	15	16.6808	17.9091	17.7621	19.8182	11.626	31.75	24.0232	12.5	14.2414
083_o_m_a_a.jpg	a	older	Male	7.18182	9.77567	23.0909	24.2382	42.5455	17.7616	35.0909	14.8758	48.7	17.8453	35.5455	25.1012
083_o_m_a_b.jpg	b	older	Male	27.1818	21.4607	28.7	20.6239	24.5455	19.2113	24.2727	15.4925	45.1818	21.3299	25.75	21.3632
091_o_m_a_a.jpg	a	older	Male	19.2	24.2936	23	23.7943	35.7273	19.1054	27.7	17.2501	42.6364	26.9788	33.8182	23.9283
091_o_m_a_b.jpg	b	older	Male	19.4545	21.9744	18.4545	20.8344	12.9091	15.7	21.0833	18.4463	44.5	21.4582	36.0909	20.9926
102_o_m_a_a.jpg	a	older	Male	22.3636	18.8429	24.7273	18.3253	35.1818	18.3184	29.4	15.629	42.6364	24.2457	31	17.28
102_o_m_a_b.jpg	b	older	Male	25.5833	22.2484	21.4	21.3292	22.2727	18.7034	22.6364	13.5002	37.4545	22.8007	20	13.1218
107_o_m_a_a.jpg	a	older	Male	15.5833	20.0565	18.0909	15.3	29.6364	19.0697	18	14.5602	45.9	20.058	23.3333	21.848
107_o_m_a_b.jpg	b	older	Male	25.25	21.3334	17.7	19.1372	19.4615	14.7287	22.3333	15.4758	29	18.2358	12.8182	11.9735
118_o_m_a_a.jpg	a	older	Male	17	17.4241	25.5833	21.5215	30	31.3659	24.7778	19.2274	36.5	23.9919	22.3636	17.8229
118_o_m_a_b.jpg	b	older	Male	21.5	20.6772	15.8889	21.0621	23	16.7212	17.4	11.5489	32.6364	21.6715	14.6667	12.536
121_o_m_a_a.jpg	a	older	Male	8.4	11.9369	13.6667	13.9827	28.25	24.324	20.3333	19.4872	36.5	25.9412	22.2727	19.267
121_o_m_a_b.jpg	b	older	Male	14.3333	16.4612	14	17.7012	16.8182	19.3846	14.8182	10.2744	24.2727	20.761	11.9091	18.7694
131_o_m_a_a.jpg	a	older	Male	8.27273	12.1416	19.9167	13.7143	29.0909	20.5302	23.7	17.9509	40.4	24.2725	10.8333	12.1568
131_o_m_a_b.jpg	b	older	Male	20.5833	19.0667	20.8889	19.3742	23.5833	15.8025	18.6	12.3756	29	22.1269	17.8333	20.7664
137_o_m_a_a.jpg	a	older	Male	8.88889	10.6706	15.0769	15.0469	33.25	22.6159	24.2	17.5676	34.6	19.99	26.9091	18.4903
137_o_m_a_b.jpg	b	older	Male	20.4545	17.386	27.0909	19.3259	20.7273	19.1421	26.5455	17.0784	39.7273	17.2864	20.8333	19.1873
141_o_m_a_a.jpg	a	older	Male	6.81818	11.6946	22.0909	17.598	29.5833	20.3847	23.7	18.4454	34	23.3095	23.1818	18.2856
141_o_m_a_b.jpg	b	older	Male	23.9091	18.2234	12.0909	14.7611	14.5455	12.8403	18.4545	14.7198	30.4545	18.9439	10.4545	14.8954
146_o_m_a_a.jpg	a	older	Male	12	17.0027	21.1	23.8209	33	22.2561	28	16.3794	46.5	21.6961	30.1818	25.3173
146_o_m_a_b.jpg	b	older	Male	26.75	20.4189	31.4444	30.4964	29.6364	19.8256	23.8182	11.9232	36.6	23.6887	21.8462	22.2255
151_o_m_a_a.jpg	a	older	Male	16.3077	20.3772	20.8333	18.7802	29.1818	19.0621	23.4	18.7213	46.5	24.9455	31	17.7933
151_o_m_a_b.jpg	b	older	Male	22.3636	20.6265	31.7	26.4031	30.9091	21.1918	18.3636	11.1828	39	16.5711	22.3636	23.754
161_o_m_a_a.jpg	a	older	Male	6.81818	12.836	17.4	19.9232	31	22.0318	19.6364	14.3476	36.6	29.3	19.9091	14.9563
161_o_m_a_b.jpg	b	older	Male	14.9167	15.3768	10.6667	16.7407	13.3333	14.1057	16.6	12.1947	27.9091	22.9672	12.8182	15.8481
166_o_m_a_a.jpg	a	older	Male	16.75	13.9683	23.2	23.607	36.5455	22.2142	38	18.6309	53.8182	26.6076	34.6364	26.6806
166_o_m_a_b.jpg	b	older	Male	26.2727	25.4366	29.8182	29.2466	30.9167	18.2032	29.8	18.6595	50	18.8944	33.9167	23.693
172_o_m_a_a.jpg	a	older	Male	7.09091	9.08245	18.9091	18.058	34.6667	19.9697	21.7778	19.8102	42.9	28.3174	18.1818	16.1606
172_o_m_a_b.jpg	b	older	Male	16.4545	17.2242	15.7273	19.0478	20.8182	19.0201	19.2727	15.1135	32.2727	22.1273	18.9167	19.0237
176_o_m_a_a.jpg	a	older	Male	11.2727	14.1781	18.4167	17.0532	27.8333	24.6976	21.8889	19.2188	42.2	23.7431	20.9091	13.0035
176_o_m_a_b.jpg	b	older	Male	22.3333	20.0106	27.3	22.9446	19.0833	14.78	23.1	12.3868	32.9091	21.6816	21.5385	19.0858
005_o_f_a_a.jpg	a	older	Female	4.16667	5.68624	19.2727	16.7636	22.0909	13.9747	26.4	13.5745	37.2727	27.3097	21.2	19.1125
005_o_f_a_b.jpg	b	older	Female	18.4167	16.1327	17.5556	19.0073	22.0909	17.1316	28.6364	21.5698	40.3636	20.0513	33.5	24.4447
012_o_f_a_a.jpg	a	older	Female	18.3636	18.7525	48.9167	13.977	44.4545	19.5416	39.6	18.0505	45.6	25.114	39.4545	19.0702
012_o_f_a_b.jpg	b	older	Female	26.5833	20.8041	42.3	28.8138	25.9	16.6697	19.3333	16.1771	31.6	21.8133	28.6923	21.6001
021_o_f_a_a.jpg	a	older	Female	20.5	27.3013	48	18.5257	44.5833	19.8195	45.1111	19.8144	50	24.1155	52.7273	25.2075
021_o_f_a_b.jpg	b	older	Female	24.9091	23.8053	41.3	23.1615	28.7273	17.1295	27.4545	16.8069	40.2	18.5939	36.5833	22.8611
024_o_f_a_a.jpg	a	older	Female	9.18182	10.4768	14.6364	15.9454	33.0909	23.5943	18.9	18.8824	37.2222	20.5838	21.75	18.1965
024_o_f_a_b.jpg	b	older	Female	16.9167	19.1381	17.5	17.3861	16.9091	16.8669	16.3636	14.726	30.25	23.9018	18.1818	12.797
030_o_f_a_a.jpg	a	older	Female	25.25	23.1011	57.4545	27.797	46.9091	18.582	48.4	27.3057	52	22.6225	40	20.8183
030_o_f_a_b.jpg	b	older	Female	35.2727	27.778	46.7	26.2215	39.3636	20.7233	38.0909	14.8489	51.4545	21.2479	37.75	18.5968
036_o_f_a_a.jpg	a	older	Female	11.8182	17.4804	38.6667	21.2959	37.2727	22.588	35.5455	19.5774	41.9	29.7226	32.5455	20.4468
036_o_f_a_b.jpg	b	older	Female	23.6667	20.8254	27.5	17.5198	31.1818	21.9537	23.0909	21.0307	30.8182	20.1237	14.4167	16.0536
044_o_f_a_a.jpg	a	older	Female	6.09091	11.1575	12.1667	15.4204	32	22.5792	13.2222	17.0937	32.9091	21.5752	17.5455	15.5136
044_o_f_a_b.jpg	b	older	Female	20.25	19.3256	23.7778	21.9418	24.4545	16.5672	21.5455	14.18	37.7	21.7002	16.4167	19.2186
047_o_f_a_a.jpg	a	older	Female	22.1818	27.3818	27.3333	25.8855	36.0909	22.0701	34.4	19.2539	41.6	29.5003	28.75	22.9985
047_o_f_a_b.jpg	b	older	Female	29.4167	24.7403	25	26.3865	28.9	21.294	26.2727	22.1273	36.3636	24.3568	27.5833	23.6546
055_o_f_a_a.jpg	a	older	Female	11.4615	14.2514	28.2727	15.2321	31.6364	22.092	35.4545	15.7058	45.3636	25.1566	28	16.3951
055_o_f_a_b.jpg	b	older	Female	20.9	22.4868	30.5455	19.6792	24.3636	11.2096	22	15.8056	34.1667	20.3149	16.3636	13.9375
060_o_f_a_a.jpg	a	older	Female	14	20.217	38.6364	21.3086	35	12.9701	29.2727	17.4533	51	25.7553	25.3333	18.5243
060_o_f_a_b.jpg	b	older	Female	25.6667	19.1612	18.4444	17.8963	22.9091	17.1082	23.1818	16.4488	33.5455	21.4586	24.0833	19.119
067_o_f_a_a.jpg	a	older	Female	23.2727	24.1954	31.1818	23.8613	46.7273	19.7083	45.6364	13.7206	48.2727	23.5291	38.9091	27.3987
067_o_f_a_b.jpg	b	older	Female	29.5833	25.3501	28.8	23.0208	31.2727	22.437	23.8333	14.2052	46.9091	21.7828	25.8182	24.5797
075_o_f_a_a.jpg	a	older	Female	14	21.6472	22.4545	18.1348	25	16.025	26.8	18.2745	38.4	24.2725	23	21.6102
075_o_f_a_b.jpg	b	older	Female	23.1667	21.2168	18.5	18.2529	23	18.5031	28.1	13.2703	32.6364	20.0513	10.4545	10.7458
079_o_f_a_a.jpg	a	older	Female	15	21.0324	20.4	17.8213	35.3636	23.0403	32.4	17.9022	39.4545	29.6795	22.6364	19.6432
079_o_f_a_b.jpg	b	older	Female	21.1667	22.3925	31.3333	16.8077	22.8182	18.5678	22.5	13.9512	29.0909	22.2641	16.4167	18.0477
086_o_f_a_a.jpg	a	older	Female	11.0833	15.2223	24.25	19.9095	31.0909	18.8757	27.4	14.9533	42.4444	25.5642	24.5833	27.6421
086_o_f_a_b.jpg	b	older	Female	24.2727	24.6296	24.8	20.9592	24.9167	18.2281	21.3	14.7577	30.7273	23.2555	20.4167	18.9663
088_o_f_a_a.jpg	a	older	Female	15.3333	22.8208	36.3333	27.1237	30.9091	22.6471	30.9	23.0673	32.8	26.8816	25.25	30.5737
088_o_f_a_b.jpg	b	older	Female	23.0833	24.4855	27.2	24.8944	22.2727	19.8801	18.2727	13.3723	27.0909	21.5521	5.36364	7.96584
096_o_f_a_a.jpg	a	older	Female	13.8333	15.6253	36.8182	20.5028	33.5833	14.8903	48.4444	14.2926	43.5833	24.2092	24.5556	23.458
096_o_f_a_b.jpg	b	older	Female	24.0833	21.4453	40	24.2796	24.9	17.773	19.8182	11.8052	25.5455	17.0843	17.8333	14.8864
100_o_f_a_a.jpg	a	older	Female	11.6364	17.374	30.9091	14.1241	35.1667	27.3191	22.7778	17.7255	33.7778	22.4153	17.6667	15.7845
100_o_f_a_b.jpg	b	older	Female	23.1667	23.025	25.9	21.3721	22.6364	18.5595	21.3636	16.2128	31.2	22.6215	13.3077	15.5209
110_o_f_a_a.jpg	a	older	Female	5.18182	11.8391	23.6364	15.9391	33.4167	23.224	19.5	16.7614	37.7273	25.3775	21.3	16.6069
110_o_f_a_b.jpg	b	older	Female	17.2727	21.2748	17.7	19.1256	23.6923	18.0526	21.1111	13.3832	38.0833	22.0473	18.0909	15.617
112_o_f_a_a.jpg	a	older	Female	16.0833	21.6142	30.2727	20.7128	38.0909	22.2506	27.1	19.0581	38.1818	28.7291	21.3	19.3738
112_o_f_a_b.jpg	b	older	Female	22.0909	25.8126	30.2	23.5646	21.6364	18.3372	25.0909	21.2859	32.8182	25.0911	18.25	20.4323
120_o_f_a_a.jpg	a	older	Female	16.6154	22.1643	29.8182	24.5594	40.5	20.686	33.6	16.2494	45.7273	18.9425	31.7273	24.4176
120_o_f_a_b.jpg	b	older	Female	22.8333	21.4893	27.9	22.9223	19.3636	21.2945	25.5455	18.6728	37.1538	17.3678	20.4444	20.36
124_o_f_a_a.jpg	a	older	Female	12.8889	20.6122	28.75	17.5143	39.0909	16.7538	40	25.0688	48	22.2711	35.5833	30.0922
124_o_f_a_b.jpg	b	older	Female	26.5	22.101	29.7	22.0859	20.25	17.1259	15.4	12.1216	29.7273	19.9804	25.1818	15.568
130_o_f_a_a.jpg	a	older	Female	5.25	9.57388	17.9091	17.0907	21.1667	15.2246	22.5556	17.0888	32.7273	27.0077	16	19.5846
130_o_f_a_b.jpg	b	older	Female	16.4167	16.6704	15.5556	18.2353	12.0909	10.7745	15.5	14.0486	21.5455	21.3137	10.1667	16.0841
133_o_f_a_a.jpg	a	older	Female	4.27273	9.80909	19.7273	17.7093	25.9167	22.2484	35.5556	29.4835	36.6	16.5677	21.2727	19.86
133_o_f_a_b.jpg	b	older	Female	13.0909	14.5152	17.9091	17.4611	17.5455	16.3729	15.8182	15.7214	28.8333	24.7454	10.3636	14.9885
143_o_f_a_a.jpg	a	older	Female	10.4545	16.3485	26.5455	20.8632	30.75	22.8199	27	18.2414	32.1	25.3923	24.8182	19.4978
143_o_f_a_b.jpg	b	older	Female	19.4545	20.3143	20.0909	17.2653	17.1818	15.3676	21.1818	12.0068	29.5455	19.5057	21.3333	18.9321
148_o_f_a_a.jpg	a	older	Female	5.27273	8.96762	25.6923	19.172	28.1667	14.4212	25.2222	19.5626	39.9091	23.2914	17.2	14.8683
148_o_f_a_b.jpg	b	older	Female	16.8182	18.9252	13.2222	17.5127	26.25	19.4662	20.1	16.1138	36.6	21.8744	17.5	15.9801
154_o_f_a_a.jpg	a	older	Female	4.66667	9.48044	21.7	21.8228	23.9091	23.2011	29.1	18.0521	35.3	27.439	16.1667	17.3249
154_o_f_a_b.jpg	b	older	Female	15.4545	15.6612	16.8	19.7135	22.5	15.9531	12.5833	12.7811	25.1	21.5327	12.8462	15.3452
158_o_f_a_a.jpg	a	older	Female	10.2727	16.0068	33.5833	20.6682	24.3636	16.3112	35	20.2594	39.4	29.353	25.2727	25.7957
158_o_f_a_b.jpg	b	older	Female	22.4167	22.3666	31.2222	23.642	24.5455	19.18	19.7273	11.8245	26.5455	19.8865	20.1667	19.3195
164_o_f_a_a.jpg	a	older	Female	7.9	11.6852	24.5833	19.7827	28.3636	20.6701	29.1	13.5929	36.1	28.0375	25.6364	14.8477
164_o_f_a_b.jpg	b	older	Female	22.3333	18.5831	25.7	21.3075	19.7273	15.2715	17.0909	13.6415	21.25	22.8995	7.72727	8.70736
174_o_f_a_a.jpg	a	older	Female	5.36364	7.6977	19	17.9611	31.0909	20.608	33.9	16.967	41.3636	23.0446	16.7273	17.8611
174_o_f_a_b.jpg	b	older	Female	12.7273	15.7549	18.4545	17.9687	22.9091	19.4188	14.6667	11.0645	25.0909	21.5845	11	15.8745

## Sheet: attr_fearful
Picture	Set	Face Age	Face Gender	Mean_YM_attr	SD_YM_attr	Mean_YF_attr	SD_YF_attr	Mean_MM_attr	SD_MM_attr	Mean_MF_attr	SD_MF_attr	Mean_OM_attr	SD_OM_attr	Mean_OF_attr	SD_OF_attr
008_y_m_f_a.jpg	a	young	Male	17.4167	18.1281	39.4167	23.9714	43	22.4187	34.4	21.4227	53.5	17.6336	49.9091	30.6152
008_y_m_f_b.jpg	b	young	Male	30.5833	25.386	25	21.1818	42.2727	14.9606	32.8182	14.7636	55.5	21.0145	40.5	26.8379
013_y_m_f_a.jpg	a	young	Male	20.7273	16.7755	33.5	21.5259	41.0909	25.2684	36	19.362	44.2727	25.8035	45.1818	24.9472
013_y_m_f_b.jpg	b	young	Male	34.3636	26.1391	23.6	23.5759	38.5	20.9089	29	23.516	47.6	18.069	39	17.8559
016_y_m_f_a.jpg	a	young	Male	17.5	20.6023	39	27.6007	47.3636	16.6269	37.6	17.3154	49	26.1321	37.9167	24.6114
016_y_m_f_b.jpg	b	young	Male	32.9091	26.8531	38.9091	26.6288	49	14.6356	39.9091	21.7598	47	26.1831	40.6154	17.6896
025_y_m_f_a.jpg	a	young	Male	19.7273	20.0604	27.0909	16.7419	33.5455	16.8545	36.8	18.54	50.75	19.4147	53	25.6255
025_y_m_f_b.jpg	b	young	Male	24	23.7219	17.5	19.121	38.5833	21.228	19.1	14.059	44.5455	25.3707	32.6667	18.6271
031_y_m_f_a.jpg	a	young	Male	22	20.0549	46.5455	21.1913	41.9	14.6397	54.1818	19.5899	51	22.9056	46.9091	28.1903
031_y_m_f_b.jpg	b	young	Male	38.75	23.879	39.4	31.373	48.8182	22.8728	29.2727	17.7544	54.6667	23.5192	36.9091	19.776
037_y_m_f_a.jpg	a	young	Male	19.0909	15.4949	31.1818	20.0241	46.3636	21.4535	30	18.4391	53.9	24.2049	41.2727	25.6089
037_y_m_f_b.jpg	b	young	Male	27.9091	24.3041	23.3	21.5151	40.9091	16.3123	30.1818	23.3359	47.4	28.1038	37.0833	18.6667
041_y_m_f_a.jpg	a	young	Male	21.6667	23.9709	48.6364	25.3861	46.75	16.3658	52.4	16.688	56.5556	21.2139	55.6667	19.5324
041_y_m_f_b.jpg	b	young	Male	30	25.7082	32.8	23.8691	48.3636	27.4273	35.9091	20.5497	54	22.823	35.1667	25.1788
049_y_m_f_a.jpg	a	young	Male	27.7273	31.2477	35.5455	27.6563	35.0909	26.0171	31.8	14.2033	46.2222	29.4227	29.4167	18.7348
049_y_m_f_b.jpg	b	young	Male	33.75	27.0156	32.8	21.4932	56.8182	14.3445	30.4545	17.7953	36.2727	25.0962	24.4545	20.593
057_y_m_f_a.jpg	a	young	Male	20.75	18.8107	41.8333	26.2188	44.3636	14.4033	42.9	18.2723	48.6	24.9898	50.8182	33.3941
057_y_m_f_b.jpg	b	young	Male	35.5	26.1238	35.8	29.977	40.1818	20.1932	29.6364	20.2942	49.6364	23.3678	41.0833	23.3956
062_y_m_f_a.jpg	a	young	Male	15	13.5892	42.25	25.1617	38.1818	26.9103	34.5455	14.8079	53.6364	22.5268	42.0909	23.5773
062_y_m_f_b.jpg	b	young	Male	31.5	22.2731	25.5	21.1621	40.5455	16.3301	28.7	19.6189	44.3636	25.4215	33.5833	21.3731
066_y_m_f_a.jpg	a	young	Male	20	18.6304	38.9167	23.7121	41.8182	23.4811	34.7273	19.7235	46.8	25.3456	38.3333	17.946
066_y_m_f_b.jpg	b	young	Male	32.8182	26.4379	31.7273	18.7408	39.4167	23.8231	23.4545	18.8646	50.3636	24.8888	36.6364	23.5214
072_y_m_f_a.jpg	a	young	Male	12.8	10.5494	48	24.0265	38.8182	18.302	29.9	18.9118	52.7778	23.6684	43.8333	28.7207
072_y_m_f_b.jpg	b	young	Male	35.1818	23.8655	55.6364	22.8003	46.9	21.7279	34.4167	20.456	39.4545	23.097	28.5833	19.0571
081_y_m_f_a.jpg	a	young	Male	18.6	18.1181	43.0769	26.6473	36	14.4361	23.8	18.456	41.6364	23.0099	34.4545	20.9206
081_y_m_f_b.jpg	b	young	Male	35.3636	26.8897	29.9091	20.6904	29.9231	20.7865	20.8889	17.1059	39.9091	27.3878	23	16.7549
089_y_m_f_a.jpg	a	young	Male	14.6	15.6148	45.0833	28.3596	39	20.4695	43	27.7849	43.7778	27.5444	39.9167	29.4879
089_y_m_f_b.jpg	b	young	Male	38.5	24.0133	28.7778	24.6565	48.4545	19.7958	37.5833	26.5962	42	26.0725	38.5833	23.0984
099_y_m_f_a.jpg	a	young	Male	20.5455	19.3151	38.0909	24.4109	36.4167	26.2902	40.5	18.4466	46.2	23.897	28.6364	22.1778
099_y_m_f_b.jpg	b	young	Male	32.6364	25.3112	29.5556	27.7989	45.5455	16.133	36.9	16.7362	37.5	29.7106	22.4615	17.9147
105_y_m_f_a.jpg	a	young	Male	18.4545	18.0907	32.9167	22.1583	27	18.0278	40.8	12.934	46.2	27.8919	32.5455	19.8109
105_y_m_f_b.jpg	b	young	Male	30.5455	26.2159	28.1111	21.257	36.4167	20.5491	21.8	16.3354	43.1	27.045	28.9167	16.2562
109_y_m_f_a.jpg	a	young	Male	18.8182	19.1824	39.3636	23.8423	44.5455	15.9585	40.1	18.9177	49.2727	21.4527	42.8182	23.9575
109_y_m_f_b.jpg	b	young	Male	32	24.6089	30.7273	28.2846	38.8182	24.3508	31.6364	16.1696	48.6364	22.2048	32	22.4678
114_y_m_f_a.jpg	a	young	Male	18.9091	14.5496	34.6667	22.2234	40.1818	15.6129	28.3	14.7351	46.3636	22.5134	44.8182	27.5602
114_y_m_f_b.jpg	b	young	Male	30.0833	25.2279	28.6	28.4574	39	17.072	26.4	17.6522	44.6	19.6819	33.0833	19.8515
119_y_m_f_a.jpg	a	young	Male	26.2727	23.8163	64.1818	30.4494	45.6667	22.3539	45.7778	14.3333	44.1818	24.8307	48.4545	27.919
119_y_m_f_b.jpg	b	young	Male	39.3333	27.2708	40.5556	25.4956	43.5455	15.7694	32.3636	19.3146	51.75	19.9414	30.5455	24.1262
123_y_m_f_a.jpg	a	young	Male	22.5455	15.1484	44.1667	22.8586	41	18.6065	40.8	16.2399	50.8	22.783	40.2727	24.2491
123_y_m_f_b.jpg	b	young	Male	31.5833	23.2632	46	24.7745	43.3636	14.3824	38.1818	16.7918	39.7	23.9353	29.5	18.6523
127_y_m_f_a.jpg	a	young	Male	23.5	19.9704	49.8	20.5794	54	19.7383	47.9	14.3948	52.3	24.2856	47.0909	26.5196
127_y_m_f_b.jpg	b	young	Male	38.75	21.2865	36	22.9837	37.8182	19.5592	34.7273	18.4829	47.8	23.6493	38.7692	22.7931
135_y_m_f_a.jpg	a	young	Male	12.4545	13.1785	14	16.7929	28.3333	17.8801	23.6	17.9456	35.7	25.4822	28.6667	23.9482
135_y_m_f_b.jpg	b	young	Male	23	22.4823	26.7778	22.5154	31.5455	25.1012	24.4545	14.5558	39.8	22.1048	31.0833	19.3459
144_y_m_f_a.jpg	a	young	Male	23.4	18.3194	59.4545	30.807	44.4545	16.133	56.2	15.1716	48.4	21.3604	49.5455	27.9584
144_y_m_f_b.jpg	b	young	Male	43.8333	29.3314	45.6667	26.4764	46.5833	18.7348	25	21.3073	40.7	27.5643	36.25	29.2982
147_y_m_f_a.jpg	a	young	Male	27.4545	26.8714	53.0909	23.4711	38.7273	16.5233	43.7	19.5337	53.9	24.1406	63.8182	23.945
147_y_m_f_b.jpg	b	young	Male	33.8182	22.7808	46.1818	27.3709	50.5	13.7014	38.0909	19.1178	57	24.2981	39.75	18.9934
153_y_m_f_a.jpg	a	young	Male	24.0909	21.5381	57.6364	30.418	36.25	17.4258	39.7778	13.2738	50.5556	25.5005	44.75	28.5438
153_y_m_f_b.jpg	b	young	Male	34.0833	26.061	35.6	27.4396	46.4	16.9063	33	20.3827	42.2727	23.9754	27.6667	19.3406
160_y_m_f_a.jpg	a	young	Male	25.0833	16.1553	35.2727	24.3479	38.5833	13.5207	45.2	21.0755	53.8	21.4673	58.9091	24.9177
160_y_m_f_b.jpg	b	young	Male	27	24.7548	28.8	25.982	40.3333	21.0814	36.9	19.7341	50.4444	23.5537	41.9231	26.1644
167_y_m_f_a.jpg	a	young	Male	7.54545	11.7163	19.9091	20.1418	29.7273	18.3035	27.9	16.1758	42.5	23.7826	32	22.3688
167_y_m_f_b.jpg	b	young	Male	25.0909	25.5008	22.1	23.4968	46.2727	19.0688	22.0909	16.3245	42	24.775	23.75	18.1214
170_y_m_f_a.jpg	a	young	Male	18	16.0284	38.1	26.7102	34.5455	18.5761	37.6	18.0259	42.2	20.0986	34.0909	29.477
170_y_m_f_b.jpg	b	young	Male	32.5	22.8851	36.9	26.7559	39.4545	19.6131	31.1818	21.3486	38.6	22.5497	23.3846	19.6661
175_y_m_f_a.jpg	a	young	Male	18.2727	22.005	49.9167	24.9234	37	18.7243	41	16.3027	51.9	23.173	56.2727	27.9001
175_y_m_f_b.jpg	b	young	Male	36	23.388	33.1	23.9975	46.3636	19.495	34.7273	20.7658	53.3636	21.7222	32.3333	23.631
010_y_f_f_a.jpg	a	young	Female	27.6364	23.6232	55.1818	20.4833	51.1	26.3669	47.4545	19.7958	48.5455	19.9818	52.8182	28.1774
010_y_f_f_b.jpg	b	young	Female	38.3636	29.3301	30.7273	25.1439	42.3636	23.8045	27.5455	20.0717	39.75	27.4826	36.6364	18.5325
020_y_f_f_a.jpg	a	young	Female	54.6923	30.1811	68.5	19.8655	56.3636	25.8931	56.1	27.1844	60.8	21.2906	53	21.3588
020_y_f_f_b.jpg	b	young	Female	53.2727	29.9068	58.6	23.9128	50.3636	23.402	40.7273	20.8187	54.6364	21.5419	44.25	20.4678
022_y_f_f_a.jpg	a	young	Female	51.3636	24.5775	61.6667	14.4746	56.4167	22.6212	56.2222	21.9361	66.4444	20.3108	62.4167	29.0688
022_y_f_f_b.jpg	b	young	Female	43.1667	20.2163	41.1	25.7572	51.6	25.0475	43.8333	20.8057	55.5833	20.456	48.9091	27.3293
028_y_f_f_a.jpg	a	young	Female	28.0769	17.9419	57	18.1163	45.0833	13.8791	34.7778	18.5255	59.2	22.16	41.3333	24.5036
028_y_f_f_b.jpg	b	young	Female	40.4545	26.2235	33.8	22.29	45	22.3652	38	22.7244	49.6364	26.0548	43.6667	23.9975
034_y_f_f_a.jpg	a	young	Female	17.25	15.6445	44.5455	19.3513	32.1818	23.5024	46.9	22.752	42.4	30.0636	44.9091	23.9977
034_y_f_f_b.jpg	b	young	Female	31.6667	23.4029	31	23.8141	36.9231	21.0217	32.2222	21.458	40.7273	23.8834	25.1818	17.3079
040_y_f_f_a.jpg	a	young	Female	68.3333	24.485	72.3636	23.6274	61.1818	20.7837	61.7	26.6168	53.3	27.5723	54	25.9654
040_y_f_f_b.jpg	b	young	Female	65.75	22.0005	42.8889	25.3596	52.2727	27.5212	41.8182	16.4853	56.9091	22.0112	43.25	22.1077
048_y_f_f_a.jpg	a	young	Female	38.5	29.0947	61.0833	26.2105	61.3636	18.359	53.1818	18.4327	51.5	26.9784	58.2727	23.7995
048_y_f_f_b.jpg	b	young	Female	43.8333	22.4695	52.1	35.363	48.6154	23.2004	29.5	21.4334	48.2727	32.3051	40.7273	25.3065
054_y_f_f_a.jpg	a	young	Female	33.3636	23.0576	57.4545	24.1552	48.5455	17.739	51.3	24.9357	59.8	21.5809	47.4545	24.3654
054_y_f_f_b.jpg	b	young	Female	46.5833	26.8953	41.8	31.2118	44.9091	22.6338	31.4167	13.4736	43.9091	27.7361	33.7273	20.7079
063_y_f_f_a.jpg	a	young	Female	45.4545	30.52	53.4545	14.7402	56	19.8394	47.7	17.7015	53.9091	18.0358	60.9091	28.5253
063_y_f_f_b.jpg	b	young	Female	42.6667	27.5923	42.3333	26.6458	56.5833	24.0358	32.5455	20.1909	52.75	25.1762	53.0909	21.9475
069_y_f_f_a.jpg	a	young	Female	28.7273	26.6387	49.4167	19.8607	42.1667	23.1235	59.5556	21.6397	52.4	25.8938	54.4545	31.7281
069_y_f_f_b.jpg	b	young	Female	62.9	23.9697	52.4167	30.8706	52.4	22.3666	43.4545	25.0813	50.0833	22.1952	41.5	23.8059
071_y_f_f_a.jpg	a	young	Female	33.8182	22.6796	47.3636	9.35171	47.4615	22.4597	36.5	21.8959	46.6	26.9782	47.5455	27.5912
071_y_f_f_b.jpg	b	young	Female	41.1818	28.0814	36.9091	26.429	44.1818	23.5577	29.1818	17.9712	46.5	24.9162	28.9091	18.2288
085_y_f_f_a.jpg	a	young	Female	23.8182	24.9392	45.6364	22.6242	34.4545	20.7815	34.4	19.346	41.8	18.9666	36.9091	28.0694
085_y_f_f_b.jpg	b	young	Female	33.5833	23.5235	38.1	24.1221	42.3333	22.6969	27.1	24.5287	44.8182	31.1795	22.75	19.9596
090_y_f_f_a.jpg	a	young	Female	37.7	20.0391	58.1818	19.3123	47.8182	21.0752	53.3	20.987	56.0909	20.5351	53.9091	23.1536
090_y_f_f_b.jpg	b	young	Female	36	27.6297	38	25.8988	41.8182	29.7046	30.3636	19.77	43.6667	22.5442	34.7273	25.6519
098_y_f_f_a.jpg	a	young	Female	61.9	32.9223	64.5	18.6961	58.6364	26.6506	55.4545	21.1866	57.5556	21.8638	64.1667	30.5669
098_y_f_f_b.jpg	b	young	Female	58.5455	20.7382	65.9091	31.9858	48.0909	26.6213	42.1	21.1106	56.5	19.6935	45.8462	18.1285
101_y_f_f_a.jpg	a	young	Female	28	20.528	53.6364	17.0427	46.4545	17.2242	53.4	24.8158	54.8	20.8636	53	24.96
101_y_f_f_b.jpg	b	young	Female	41.2727	23.4866	47.1818	27.8202	52.8182	24.4083	31.6364	22.6109	44	24.0749	42.25	22.0583
106_y_f_f_a.jpg	a	young	Female	46.8462	24.755	52.3	20.1442	49.9091	20.8972	51.3	26.0344	59.4444	20.959	50.1667	31.8885
106_y_f_f_b.jpg	b	young	Female	52.4167	27.6256	39.3333	28.1381	52.0833	23.4539	30.7	15.1954	45.4545	26.1318	39.7273	24.6499
115_y_f_f_a.jpg	a	young	Female	60.1818	24.4574	62.5455	19.4287	58.8182	22.3822	66.2727	20.9384	68.4	16.1121	56.5	29.8466
115_y_f_f_b.jpg	b	young	Female	55.1818	30.7175	51	29.0207	59.8182	26.1527	42	22.676	59.5455	19.1539	44.4167	22.7535
125_y_f_f_a.jpg	a	young	Female	7.33333	8.75249	35.6	19.1903	36.0833	22.0184	25.3333	18.1108	46.3636	26.4585	43.6364	29.9141
125_y_f_f_b.jpg	b	young	Female	31.5	20.664	34.7	25.9103	35.0909	21.3844	29.4545	16.7234	48	24.5153	33.8333	23.5559
132_y_f_f_a.jpg	a	young	Female	27.9	17.9224	50.5	22.2609	45.5455	19.9016	44	25.4253	49.2	21.9434	54.9167	27.6256
132_y_f_f_b.jpg	b	young	Female	37.5	23.5275	32.9	24.8571	31.0909	23.7843	32.7273	22.1815	53.0909	21.9201	39.4167	21.61
134_y_f_f_a.jpg	a	young	Female	34.6	26.4415	51.8333	20.564	56	13.6715	42.2	20.8049	54.8	27.3244	48.9091	25.1096
134_y_f_f_b.jpg	b	young	Female	39.8333	29.0668	48.1111	27.0483	50.8182	24.8186	31.3636	20.2152	49	30.2076	36.3846	22.0248
140_y_f_f_a.jpg	a	young	Female	33.1667	29.2756	64.4	11.6447	45.8182	14.5452	45.5455	25.4533	52	20.5318	41.1818	25.2183
140_y_f_f_b.jpg	b	young	Female	35.0909	20.3689	40	19.2585	37	24.8779	26.1818	19.4258	42	25.9307	28.75	23.1168
150_y_f_f_a.jpg	a	young	Female	35.0833	16.3733	48.1667	13.0998	49.75	25.1942	44.1111	15.6161	55.5	23.5525	52.25	24.2567
150_y_f_f_b.jpg	b	young	Female	44.5	32.0014	32	24.7117	41.7273	29.2304	33	18.3139	51.75	22.1652	41.2727	22.1454
152_y_f_f_a.jpg	a	young	Female	46.3636	27.9867	60.3636	27.9831	55.9091	27.0165	55.3	18.1662	55.3636	17.4257	46.6364	25.1685
152_y_f_f_b.jpg	b	young	Female	49.75	25.3453	48.8889	30.226	53	28.1141	40.4167	27.1107	53.5	21.2025	27.8	25.2754
162_y_f_f_a.jpg	a	young	Female	14.7778	9.16212	49.9167	20.9	55.2	21.301	48	27.0222	55.0909	20.8924	47.9091	27.1384
162_y_f_f_b.jpg	b	young	Female	38.0833	26.6713	45.9	22.103	40.5455	29.2553	33.2727	20.0952	46.2727	30.8061	35.9167	21.9398
163_y_f_f_a.jpg	a	young	Female	40.7273	32.5118	57.6364	23.0229	38.9167	18.6375	38	22.8309	53	22.0252	31.6667	20.5087
163_y_f_f_b.jpg	b	young	Female	35.8182	22.4758	45.7	25.1663	51.8333	24.5684	36.5455	13.6188	48.6364	23.9636	36.9167	23.6738
171_y_f_f_a.jpg	a	young	Female	30.5455	20.3537	52.8333	17.0498	37.5833	17.3962	38.8889	17.04	51	24.8014	42.2727	22.6278
171_y_f_f_b.jpg	b	young	Female	39.3636	24.8043	39.3636	25.0251	53.9091	24.6595	39.0909	25.0458	48.4	18.4523	40.4167	22.577
173_y_f_f_a.jpg	a	young	Female	28.8182	24.8307	57.7273	22.4013	49	13.0454	49.5556	22.4004	55.6364	25.2399	50	29.2472
173_y_f_f_b.jpg	b	young	Female	32	24.0167	43.2727	34.2523	49.5	16.4131	33.5	24.8395	44.7273	24.7269	27.4545	21.3839
177_y_f_f_a.jpg	a	young	Female	23	19.8645	62.7273	23.5291	45.3636	20.0214	45	16.7332	49.6667	28.788	47.9167	30.2308
177_y_f_f_b.jpg	b	young	Female	44.8333	26.9303	32	27.8887	35.2727	24.5483	31.6667	20.187	48.9	23.2735	43.1538	21.0826
182_y_f_f_a.jpg	a	young	Female	26.8182	12.7657	62.3636	27.3616	45.3636	16.6269	44.3636	19.0802	56.2222	23.2958	43.0833	24.3813
182_y_f_f_b.jpg	b	young	Female	30	27.4773	30.3	19.7262	35.0833	26.054	21.6	16.3924	43.1818	25.643	27.0833	22.2198
007_m_m_f_a.jpg	a	middleaged	Male	6.90909	10.5684	19.0909	18.9602	29.4545	21.6396	22.3	14.2599	32.4444	20.8393	17.3333	16.9187
007_m_m_f_b.jpg	b	middleaged	Male	18	18.4686	15.4	18.2404	17.4	15.1305	17.0833	13.4195	34.75	21.8263	17.0909	14.9228
014_m_m_f_a.jpg	a	middleaged	Male	10.8	19.0543	15.2727	17.269	31.6667	20.9993	25.4444	16.9271	48.7778	26.2001	29.5	24.4224
014_m_m_f_b.jpg	b	middleaged	Male	21.4545	22.8314	23.1	28.3371	29.3333	17.9916	23.4	20.145	35.2727	23.0047	19.4167	20.264
026_m_m_f_a.jpg	a	middleaged	Male	17.5455	18.6621	25.1667	21.3534	39.0909	25.6182	32.5	13.5913	46.2727	25.0443	43.0909	27.5697
026_m_m_f_b.jpg	b	middleaged	Male	31	24.9217	23.7	23.2811	30.3636	18.8376	19.9091	15.4172	49.9091	18.0247	29.8333	22.4857
032_m_m_f_a.jpg	a	middleaged	Male	13.9167	17.5316	21.1818	16.0301	39.5455	16.7294	33	13.2749	46.1111	28.2199	41.1667	26.6453
032_m_m_f_b.jpg	b	middleaged	Male	22.7273	22.7512	15.9091	17.598	35.8182	18.6752	31.1818	17.6455	52.5455	22.3847	30.4167	19.8653
038_m_m_f_a.jpg	a	middleaged	Male	15.4167	16.6048	23.2727	18.8737	37.9091	20.4864	29.3	18.5954	45.9	23.3307	43.3636	22.9925
038_m_m_f_b.jpg	b	middleaged	Male	29.5833	24.1076	18.3333	19.9937	32.4545	20.1214	24.8182	16.3145	47.9091	17.3635	32.75	24.2529
045_m_m_f_a.jpg	a	middleaged	Male	14.4167	13.7607	17.0909	13.6488	28.7273	18.1444	29.2	13.2816	36	18.1604	32.7273	29.6651
045_m_m_f_b.jpg	b	middleaged	Male	17.5833	19.7505	17.1	19.4562	25.3636	19.9864	17.4545	16.5853	34.6364	27.0084	23.4545	21.4586
051_m_m_f_a.jpg	a	middleaged	Male	14.4545	18.6567	16.0909	17.8575	29.8333	21.049	27.1111	13.688	45.1	23.6194	33.2727	26.9447
051_m_m_f_b.jpg	b	middleaged	Male	20.3333	18.6905	11.8889	19.3161	21.3636	17.9515	18.5	12.0853	29.6667	22.2438	19.2727	19.4889
056_m_m_f_a.jpg	a	middleaged	Male	15.6	12.7906	19.3333	15.2753	26.1818	19.1302	24.2	16.4236	46.7778	26.3428	29.8333	18.7415
056_m_m_f_b.jpg	b	middleaged	Male	23.6667	22.1701	18.5	22.2224	24.5455	17.5748	23.9091	16.059	35.3636	27.89	18.3333	20.6808
058_m_m_f_a.jpg	a	middleaged	Male	10	10.3537	19	21.8632	28	16.9765	21.4	17.9332	33.3	20.5861	30.8182	18.1869
058_m_m_f_b.jpg	b	middleaged	Male	21.9091	19.542	16.8	21.6014	29.5	16.9572	17.7	13.8086	28.6	22.1219	20	17.7388
068_m_m_f_a.jpg	a	middleaged	Male	16.0909	19.4085	22.8333	19.7661	35.7273	19.8348	27.4	17.3794	45.4	20.2111	29.9167	19.9429
068_m_m_f_b.jpg	b	middleaged	Male	21	21.6249	17.8889	16.5563	14.3636	11.9103	19.7273	14.1074	37.4545	23.7755	30.3333	26.5581
070_m_m_f_a.jpg	a	middleaged	Male	10.0909	8.17869	23.5	16.9572	27.9091	16.6521	36.7	14.1425	43	23.1469	42.3333	25.1082
070_m_m_f_b.jpg	b	middleaged	Male	27.75	21.5243	27	19.0788	25.4545	19.7401	22.7273	15.9881	34.3636	20.6895	28.9167	23.7121
077_m_m_f_a.jpg	a	middleaged	Male	10.1818	14.497	25.5833	15.8599	32.3	23.2381	28	18.0278	41.2	22.4093	34.3636	18.057
077_m_m_f_b.jpg	b	middleaged	Male	18.25	19.4054	19.7778	17.0204	29.9091	18.5659	16.5455	13.4117	34.6364	24.679	17.6667	19.773
082_m_m_f_a.jpg	a	middleaged	Male	10.5556	10.8295	26.6667	18.2823	33.75	19.0651	36	15.4434	44.4	20.1285	39.6667	13.1103
082_m_m_f_b.jpg	b	middleaged	Male	27.8333	22.3641	32.6	24.3228	33	15.8556	28.9091	18.8968	41.75	20.4856	25.1818	18.7873
087_m_m_f_a.jpg	a	middleaged	Male	17.9167	18.098	27.4545	21.0113	38.5455	14.4386	29.3	22.7305	50.6	19.5687	55.3636	31.9132
087_m_m_f_b.jpg	b	middleaged	Male	30.4545	24.5657	24.3	26.2257	40.6667	16.9616	33.1818	18.8617	50.9	21.9467	42.8462	20.6996
092_m_m_f_a.jpg	a	middleaged	Male	9.72727	13.0468	15.8182	20.1981	25.3636	21.7084	26.5	17.9211	42	27.1063	28.8462	20.5906
092_m_m_f_b.jpg	b	middleaged	Male	17.2727	21.067	18.7	20.5645	14.4545	15.3451	18.5833	13.99	37.9	28.0177	18.5	20.3715
094_m_m_f_a.jpg	a	middleaged	Male	14.25	17.0514	18.0909	22.3359	34.0909	23.3857	26.8	18.48	42.1	25.9677	32.8333	24.5388
094_m_m_f_b.jpg	b	middleaged	Male	32.25	26.728	24.5	26.9495	29.7273	19.0635	23.0909	20.9211	42.1	27.8905	20.5385	20.3618
104_m_m_f_a.jpg	a	middleaged	Male	6.45455	6.34608	20.6667	15.488	29.6364	16.9722	29.1	14.4795	41.1	21.7125	25.0909	18.7854
104_m_m_f_b.jpg	b	middleaged	Male	23.3636	20.1954	19.9	22.8106	30.8333	14.3833	24.7	17.205	31	23.9393	20.2727	16.1003
108_m_m_f_a.jpg	a	middleaged	Male	11.8462	17.9344	24.7	16.9184	23.8333	21.4723	26	17.5499	39.3	23.1663	20.9091	20.107
108_m_m_f_b.jpg	b	middleaged	Male	30.3333	21.7604	20.6	25.0209	29.25	16.4158	29	22.4277	32.3	24.4997	14.4615	15.1031
116_m_m_f_a.jpg	a	middleaged	Male	20.75	21.9384	31.1818	19.3588	33.5833	18.1582	28	16.2942	41.6	25.0697	20.3636	17.212
116_m_m_f_b.jpg	b	middleaged	Male	28.1667	24.5462	14.6	17.958	29.7273	20.9718	31.0909	21.187	30.3636	21.5141	17.5833	15.2641
126_m_m_f_a.jpg	a	middleaged	Male	16.5833	15.0663	22.7	17.2566	35.3846	21.4846	34.25	22.1214	42.8	19.0951	28.9167	21.9812
126_m_m_f_b.jpg	b	middleaged	Male	26.0909	23.2528	31.4545	23.8552	37	18.2099	29.1818	18.4218	37.1818	20.7693	22.8182	18.6913
136_m_m_f_a.jpg	a	middleaged	Male	8.66667	13.1932	15.0909	16.0341	21.2727	15.2059	21.4	17.1866	40.4	23.6371	29.1667	24.2893
136_m_m_f_b.jpg	b	middleaged	Male	17.9167	18.9567	9.8	15.803	16.9091	15.934	17.4545	12.8869	21	19.8449	7.3	12.0282
142_m_m_f_a.jpg	a	middleaged	Male	19.9167	19.0857	26.6667	20.4154	35.3333	24.3845	23.8889	17.2804	36.9091	26.1475	26.2	17.6686
142_m_m_f_b.jpg	b	middleaged	Male	21.7273	19.7691	28.1818	25.6508	21.3333	19.8555	17.4545	13.2012	26.5455	20.3684	18.4167	14.3683
149_m_m_f_a.jpg	a	middleaged	Male	13.4545	17.0726	24.9167	17.6813	33.0833	23.9031	37.3	17.7579	44.2727	23.5843	28.1818	20.5612
149_m_m_f_b.jpg	b	middleaged	Male	26.8182	22.6619	24.2222	22.9171	26.6364	17.7498	26.9091	21.0212	39.8	19.4239	22.3846	18.0718
155_m_m_f_a.jpg	a	middleaged	Male	13.5	17.386	19.3636	20.7474	33.4167	14.016	38.2222	20.7953	48.6667	20.1122	39.6923	21.3479
155_m_m_f_b.jpg	b	middleaged	Male	24.1667	22.7909	18.7778	22.3371	31.9091	20.5449	22.7273	16.0692	39.5833	22.8013	26.9	19.8352
159_m_m_f_a.jpg	a	middleaged	Male	14.8182	12.7108	27.5385	25.2112	30.1667	22.2377	35.2	19.9878	40.1111	22.0025	29.8333	20.4532
159_m_m_f_b.jpg	b	middleaged	Male	25.9091	21.5567	34.7273	27.4776	38.5833	23.7504	20	14.8922	32.1818	21.6463	32.1667	23.4476
165_m_m_f_a.jpg	a	middleaged	Male	17.7	14.5453	27.5833	17.7378	42.4545	21.1583	36.6	8.93433	38.3	21.0821	32.5455	27.4458
165_m_m_f_b.jpg	b	middleaged	Male	29.75	24.2004	31.4	23.623	30.8333	19.8212	22.3636	15.0816	36.2	22.9192	23.8462	20.9039
169_m_m_f_a.jpg	a	middleaged	Male	8.58333	9.40462	26.2727	22.37	35.0909	21.8333	24.9	18.8588	41.4545	25.8355	26	20.3912
169_m_m_f_b.jpg	b	middleaged	Male	26.7273	23.597	18	21.0502	22.0909	17.7226	22.9091	15.3913	31.3636	22.3485	20.8182	18.5516
178_m_m_f_a.jpg	a	middleaged	Male	20.6364	18.917	36.9167	20.9825	37.4545	14.1022	43.4	19.323	43.8182	21.1746	42.8	28.3972
178_m_m_f_b.jpg	b	middleaged	Male	31	25.5539	27.1818	20.7934	32.0909	21.0592	30.3	17.5376	46.8182	24.0617	34.6364	26.097
179_m_m_f_a.jpg	a	middleaged	Male	14.1111	20.3005	33.75	21.6002	39.2727	20.0903	31.9	14.3329	46.2	20.7996	35.3636	19.268
179_m_m_f_b.jpg	b	middleaged	Male	27.0909	20.0073	30.3636	19.1743	24.1818	18.3402	23	14.4707	30.8182	22.5159	21.8333	17.0818
006_m_f_f_a.jpg	a	middleaged	Female	45.4	21.7675	64.4615	18.8309	57.0833	13.6679	59.4444	13.173	60.2	23.1603	68.0909	28.6442
006_m_f_f_b.jpg	b	middleaged	Female	40.75	24.7685	48.2	37.1178	49.6364	28.4615	42.8182	18.0987	54.9091	21.6262	40.9167	27.2945
011_m_f_f_a.jpg	a	middleaged	Female	11.2727	10.6686	44.25	18.6261	38.9167	19.4584	35.3	21.8939	41	25.4034	34.1818	19.8435
011_m_f_f_b.jpg	b	middleaged	Female	26.9167	23.2553	35.3333	25.9615	48.5833	23.7466	28.5	16.3316	56.3	23.3145	37.25	20.955
019_m_f_f_a.jpg	a	middleaged	Female	8.75	12.241	29.0833	21.2665	34.1818	24.2768	32.8	16.943	36.1	23.718	34.4545	25.0334
019_m_f_f_b.jpg	b	middleaged	Female	15.6364	17.2874	26.5455	22.8752	35.1818	21.484	21.3	17.2179	26.1818	21.2688	20.4167	19.7735
029_m_f_f_a.jpg	a	middleaged	Female	19.6364	17.1364	40.25	24.1816	44.9167	24.788	44.4444	23.109	41.8182	25.2144	44.8182	22.4001
029_m_f_f_b.jpg	b	middleaged	Female	28	22.6936	32	21.114	48.1818	23.25	29.5455	14.9757	41.7	28.119	30.0833	21.1551
035_m_f_f_a.jpg	a	middleaged	Female	8.63636	9.77008	22.0909	19.0287	23.7	19.8889	25.9091	15.3718	47.6	25.8078	23.9091	20.0472
035_m_f_f_b.jpg	b	middleaged	Female	14.3333	15.9393	16.3333	17.3061	20	13.6648	20.9	20.4855	39	18.9326	14.5833	14.6192
043_m_f_f_a.jpg	a	middleaged	Female	9	13.0231	25.3636	19.2524	29.8182	15.1117	26	15.2388	38.8	23.1939	26.9091	18.7161
043_m_f_f_b.jpg	b	middleaged	Female	16.75	17.4049	26.9	22.0124	35.8	29.0586	24	19.0105	39.9	31.1571	28	24.1171
050_m_f_f_a.jpg	a	middleaged	Female	14	15.5154	39.6	21.8744	30.6364	19.9864	41.5	16.9066	39.2	28.4246	31.0909	20.2556
050_m_f_f_b.jpg	b	middleaged	Female	19.0833	19.6166	34.5556	18.9678	29.75	24.5695	28.5	17.0766	40.4545	27.3217	26.5	17.2916
052_m_f_f_a.jpg	a	middleaged	Female	18.3636	21.9603	40.1667	17.3877	38.1818	18.6966	29	15.3036	58.8	17.0542	38.1818	18.9094
052_m_f_f_b.jpg	b	middleaged	Female	28.0833	21.4496	29.9	21.6869	44.2727	24.4871	24.8	16.9168	48.5455	24.1428	27	23.8899
061_m_f_f_a.jpg	a	middleaged	Female	32.4167	27.6716	63	19.9349	35.8333	19.5301	42.4444	23.0603	46.7778	27.4899	52.4167	30.9617
061_m_f_f_b.jpg	b	middleaged	Female	44.5	26.804	62.7	20.8596	44.8182	24.1653	31.8	22.3497	50.5455	21.947	38.1667	25.6403
064_m_f_f_a.jpg	a	middleaged	Female	21.5455	21.016	42.4545	19.2788	44.5455	19.6131	47.8	19.4696	47.4	27.2242	42.5455	24.4841
064_m_f_f_b.jpg	b	middleaged	Female	25.9091	23.9393	34.9	27.0163	35.5455	20.1264	28.2727	20.0154	48.4545	25.5514	25.25	21.1494
073_m_f_f_a.jpg	a	middleaged	Female	18.75	19.4335	55.5455	14.8483	43	27.4627	39.4	21.4952	43.7	24.2031	39.8182	21.7937
073_m_f_f_b.jpg	b	middleaged	Female	25.4545	23.6151	42.2727	24.434	34.75	22.3896	24.2	17.8313	31.9091	21.3563	28.4167	18.9039
080_m_f_f_a.jpg	a	middleaged	Female	22.5455	25.5083	45.8182	20.5709	49.4545	13.8951	44	13.2162	48.6	22.0313	37.2727	23.8499
080_m_f_f_b.jpg	b	middleaged	Female	32	25.8844	44	26.072	42	26.5141	31.6364	20.1657	45.5	28.3308	40	23.0391
084_m_f_f_a.jpg	a	middleaged	Female	9.75	11.9478	27.7	16.4658	30.9091	14.7	37.8	21.8774	39.3	24.7568	35.0909	17.0262
084_m_f_f_b.jpg	b	middleaged	Female	23.7273	21.5086	36.9091	22.6117	29.4545	25.9668	23	16.7664	46.3	25.0779	28	20.7204
093_m_f_f_a.jpg	a	middleaged	Female	16.2222	17.4627	37.8333	17.3773	37.7273	19.9103	32.2	17.6811	52	23.8747	42.1667	21.362
093_m_f_f_b.jpg	b	middleaged	Female	23.4545	20.7285	36.7	27.9883	35	24.2453	27.8	21.9889	44.8	27.3163	33.3846	22.8857
097_m_f_f_a.jpg	a	middleaged	Female	10	11.349	29.1818	22.9949	33.7273	24.9523	29.4545	16.6875	40.8	26.1865	23.3636	16.6329
097_m_f_f_b.jpg	b	middleaged	Female	23.5	19.4773	15.5	16.0364	23	17.9241	19.3636	12.8396	29.4545	22.8226	18.0909	21.389
103_m_f_f_a.jpg	a	middleaged	Female	18.9167	17.3805	31.7273	17.2574	52.0909	15.0629	38.9	16.8223	46.2	25.3675	39.3636	29.8706
103_m_f_f_b.jpg	b	middleaged	Female	24.9167	20.147	23.8889	21.6878	35.3333	22.3132	27.9091	17.2885	34.6	22.8191	25.0833	19.3412
111_m_f_f_a.jpg	a	middleaged	Female	18.8333	20.0809	51.0833	16.401	35.5455	15.7058	47.1	21.0262	46.6364	26.3525	46.7273	28.4924
111_m_f_f_b.jpg	b	middleaged	Female	32.7273	26.2034	34.4	28.9797	40.5	25.5965	31.2	17.1192	39.8182	20.4539	29.6364	17.9515
113_m_f_f_a.jpg	a	middleaged	Female	19.5455	23.4024	43.1818	24.3344	36.8182	16.5398	46.4	22.6725	45	24.4867	39.3636	28.026
113_m_f_f_b.jpg	b	middleaged	Female	30.5	26.4042	34.5556	30.1003	39.25	24.7648	25.1818	15.7659	31.3636	22.8047	27.5833	26.0086
117_m_f_f_a.jpg	a	middleaged	Female	26	19.8192	50.3333	19.9742	56.4545	17.4606	45.6	21.2613	68.9	14.6852	54.4167	26.6781
117_m_f_f_b.jpg	b	middleaged	Female	34.0833	22.9048	38.7	25.7727	56	19.4843	39.6	17.0893	68.9091	13.8813	52.1667	26.395
122_m_f_f_a.jpg	a	middleaged	Female	11.4545	16.1639	39.6154	20.1723	35.2727	23.8583	33	13.2413	45.8	23.4227	32.1818	17.9601
122_m_f_f_b.jpg	b	middleaged	Female	17.6364	16.8004	20.2727	16.4808	22.0909	17.6264	24.5455	14.2433	32.2727	22.5703	23.1667	20.8929
128_m_f_f_a.jpg	a	middleaged	Female	12.3333	12.078	31	23.5891	33.6667	20.606	33.8889	17.8427	47.2222	21.8276	32.6667	18.2275
128_m_f_f_b.jpg	b	middleaged	Female	19	17.6532	30.6	22.1821	32.9091	20.6226	21.8182	16.3696	40.7	25.7857	28.3077	19.83
138_m_f_f_a.jpg	a	middleaged	Female	16.3636	15.6861	35.1667	18.5856	33.5455	22.6158	32.9091	20.6226	40.8	21.4051	34.6364	20.3483
138_m_f_f_b.jpg	b	middleaged	Female	26.75	21.2266	29.8889	21.4502	30.6667	25.1517	28	23.9416	43.3636	24.1589	23.75	18.9023
139_m_f_f_a.jpg	a	middleaged	Female	21.2	19.3437	46.3846	16.7707	47	24.9982	40.7778	19.2664	53.1818	20.4588	49	29.17
139_m_f_f_b.jpg	b	middleaged	Female	27.5	23.075	33.6	16.1878	38.9167	25.5395	30.9	18.4659	41.9	30.2671	35.5	25.8896
156_m_f_f_a.jpg	a	middleaged	Female	11.6364	10.7636	21.8182	20.049	26.7273	16.5293	31.7	17.6197	48.2222	26.4328	37.8333	17.0765
156_m_f_f_b.jpg	b	middleaged	Female	16.8333	17.5905	17.4444	18.9084	34.2727	25.0882	24.2727	15.774	46.8182	23.9116	20.8333	19.0351
157_m_f_f_a.jpg	a	middleaged	Female	23	22.0866	46.8	16.7981	40.4545	22.8839	41.7	15.9308	50.1818	22.4224	44.4545	17.4205
157_m_f_f_b.jpg	b	middleaged	Female	31.8182	26.7687	37.3	22.7843	37.5455	23.8385	28.1818	22.1125	37.1818	23.3787	35.8333	23.096
168_m_f_f_a.jpg	a	middleaged	Female	17.5	16.9984	34.6667	19.2606	30.1667	19.4928	31.4444	21.1194	51.4	25.8251	38.6364	16.7109
168_m_f_f_b.jpg	b	middleaged	Female	28.9167	23.9221	31.2	20.6602	39	21.49	28	14.3457	42.8	25.0945	30.1667	23.7212
180_m_f_f_a.jpg	a	middleaged	Female	11	16.8077	26.4	19.6084	32.7273	19.0583	31.3	14.553	47.4444	25.0405	34.4167	26.7223
180_m_f_f_b.jpg	b	middleaged	Female	18.8333	15.9136	27.7	24.3587	22.4615	18.1641	17.8	12.0351	25.4545	23.6659	18.0833	18.9231
004_o_m_f_a.jpg	a	older	Male	19.1818	18.1869	44.75	26.4167	48	12.4827	40.1	17.2527	52.7778	19.709	39.3333	24.4106
004_o_m_f_b.jpg	b	older	Male	31.6364	32.0602	31.8	28.631	40.7273	14.0292	33.3636	17.9682	52.3333	22.5281	34.5455	20.9111
015_o_m_f_a.jpg	a	older	Male	10.4	9.37135	31.3333	22.2193	32.25	22.1939	34.4444	14.9843	46.1	22.4472	35.6364	18.446
015_o_m_f_b.jpg	b	older	Male	26.25	21.8346	17.8	17.5233	28.9167	19.2847	26.7273	24.438	48.3636	23.5426	19.7273	18.8154
018_o_m_f_a.jpg	a	older	Male	9.08333	10.6298	23.3333	17.7985	25.8	18.8373	28.5833	17.5004	38.7273	22.6764	21.0909	20.0023
018_o_m_f_b.jpg	b	older	Male	24.9167	23.5158	23.1111	17.496	19.25	16.0801	19.7	13.1322	37	26.0998	16.8333	17.9587
027_o_m_f_a.jpg	a	older	Male	14.3636	19.4024	25.3636	24.606	28.6667	22.2643	28.8	24.6297	45.2	21.3323	19.1818	17.8091
027_o_m_f_b.jpg	b	older	Male	15.3333	14.92	15.5	19.4379	21.5833	18.6424	19.0909	16.8728	37.6364	26.5001	17.1667	17.796
033_o_m_f_a.jpg	a	older	Male	12.5833	18.6229	25.2727	18.5854	33.4545	25.0055	27.8	15.929	43.7	21.7565	37.1818	15.7849
033_o_m_f_b.jpg	b	older	Male	25.5455	24.9895	30.9	21.9568	28.8182	14.0557	18.3636	18.0791	46	25.4205	31.6667	22.2887
039_o_m_f_a.jpg	a	older	Male	11.5	16.6815	27.4615	22.0099	34.2727	17.613	29.4	17.958	36.4	31.5038	24.3636	15.7561
039_o_m_f_b.jpg	b	older	Male	23	20.7043	19.0909	22.2416	21.4545	18.063	20.0909	14.7814	26.7	19.4596	16.3077	15.9185
042_o_m_f_a.jpg	a	older	Male	10.2727	15.5505	21.8182	23.112	37.0909	24.3329	20.5	13.778	46.3333	22.7321	17.6667	20.3529
042_o_m_f_b.jpg	b	older	Male	13	13.7259	13.7	13.7522	17.0833	17.4328	17.7	15.5424	28.0833	19.2564	12.7273	13.0007
046_o_m_f_a.jpg	a	older	Male	8.36364	18.4243	17.7273	18.7888	26	24.8633	20	16.2711	32	23.0521	14.4545	16.8663
046_o_m_f_b.jpg	b	older	Male	14.4545	17.7108	13.7273	17.76	17.1	14.4872	15.4545	14.0311	23.5	18.9282	10.9167	11.9959
053_o_m_f_a.jpg	a	older	Male	16.1667	23.3893	22.9091	19.8568	28.3333	19.7592	35.6667	16.225	37	23.3109	23.8182	18.3348
053_o_m_f_b.jpg	b	older	Male	24.5455	24.9935	19.4444	18.7224	22.1818	17.4288	22.7273	15.1333	34.9091	22.8712	20.5	17.1066
059_o_m_f_a.jpg	a	older	Male	16.5833	16.6486	22.9091	18.2234	31.6364	20.116	28	19.8494	40.3636	22.5489	21.3636	20.4757
059_o_m_f_b.jpg	b	older	Male	19.5833	17.3701	20.2222	19.1949	24.6667	14.8344	19.7	13.3337	34.4545	18.8115	9.91667	12.8308
065_o_m_f_a.jpg	a	older	Male	18	20.8087	23	20.347	37.4545	24.6632	28.8	17.9059	42.5	24.3093	34.1818	18.5678
065_o_m_f_b.jpg	b	older	Male	23.0909	22.9105	27.8182	27.8812	21.9091	19.8164	19.7273	13.5062	28.8	22.8658	19.6667	19.4625
074_o_m_f_a.jpg	a	older	Male	8.54545	13.5821	14.4545	15.1087	31.25	24.4247	31.1111	26.9186	39.9	25.9805	18	15.2381
074_o_m_f_b.jpg	b	older	Male	14.4545	16.7115	17.6667	20.1122	22.5	15.5224	20.5	16.8172	34.2	24.6026	18.1538	18.792
076_o_m_f_a.jpg	a	older	Male	9.8	15.8801	25.3333	20.9169	21	14.8526	20.1	17.2269	44.7	25.4779	23.5455	17.4949
076_o_m_f_b.jpg	b	older	Male	25.75	21.8887	26.5	21.65	24.0909	18.8916	18.9091	18.7588	33.2	25.5334	14.8333	15.2007
083_o_m_f_a.jpg	a	older	Male	7.66667	10.7224	18	16.4682	33.3333	21.2018	19.7778	17.3837	40.2	25.5117	23.9167	19.6767
083_o_m_f_b.jpg	b	older	Male	23.8333	21.7875	23.2	22.0343	23.6667	16.8325	17.7273	13.0391	36.75	23.6648	12.0909	11.2823
091_o_m_f_a.jpg	a	older	Male	11.3333	17.359	19.5833	18.273	36.7273	28.7544	31.9	16.5694	35.7	24.9089	32.0909	21.1776
091_o_m_f_b.jpg	b	older	Male	20.3333	19.5371	12.4444	16.6966	16.4167	14.9633	22	14.345	37.8	21.2436	22.75	17.9298
102_o_m_f_a.jpg	a	older	Male	10.5455	12.4608	23.0909	21.7507	33.2727	21.6891	31.2	20.6279	41.9	22.8349	27.8182	19.8384
102_o_m_f_b.jpg	b	older	Male	23.8333	21.9579	13.4444	17.2417	28.4545	21.3043	22.8	15.1349	34.8	28.7704	23.5	19.1192
107_o_m_f_a.jpg	a	older	Male	2.2	5.00666	12.8333	18.9393	22.0909	22.7176	22.2	20.0266	37.5	22.8826	13.8333	15.3495
107_o_m_f_b.jpg	b	older	Male	25.3333	25.1372	21.5	23.0181	15.8182	17.7697	15.0909	11.6829	31.2	19.031	8.23077	8.45728
118_o_m_f_a.jpg	a	older	Male	13	15.7056	17.9231	19.6743	31.6364	21.0156	28.1	17.5211	37.4	24.332	20.1818	16.6902
118_o_m_f_b.jpg	b	older	Male	22.25	18.9167	15.2222	16.146	17.6364	14.8612	21.2727	17.7262	31.2727	21.4014	13.75	15.9893
121_o_m_f_a.jpg	a	older	Male	6.54545	8.23849	12.0833	13.125	25.25	16.6958	22.4444	17.9591	35.7	28.0359	15.5833	16.2842
121_o_m_f_b.jpg	b	older	Male	18.6364	14.2216	21	21.0666	12.6364	10.308	17.8182	11.3298	27.2727	22.7864	11.3333	10.6969
131_o_m_f_a.jpg	a	older	Male	13.3636	17.6481	16.2308	19.7026	20.0909	18.5659	26.1	15.3655	36.9	24.365	22.3636	20.3336
131_o_m_f_b.jpg	b	older	Male	17.0909	19.9823	21.6364	25.711	20.4	17.7464	16.9167	12.4204	28	25.385	17.3333	20.25
137_o_m_f_a.jpg	a	older	Male	5.5	10.4577	17.0909	16.3	26.5455	22.2682	18.3	16.1111	41.7	24.5087	18.1818	15.7532
137_o_m_f_b.jpg	b	older	Male	14.5833	16.1158	18.8	18.7546	18.4545	14.9356	13.4545	10.4438	36.2727	28.2811	16.6667	20.1825
141_o_m_f_a.jpg	a	older	Male	4.54545	8.16534	20	19.0788	19.8182	17.3598	20.3636	14.6784	34.6364	27.075	18.3636	19.054
141_o_m_f_b.jpg	b	older	Male	20.5	19.9841	13.4444	17.4149	18.1818	14.0842	15.1667	12.5251	26.5455	18.8274	10.9167	10.5267
146_o_m_f_a.jpg	a	older	Male	13	16.6373	25.1818	22.7676	26.9091	15.8143	26.5	19.352	36.8333	22.8228	16.7	18.0558
146_o_m_f_b.jpg	b	older	Male	29.8182	26.0914	13.3	16.513	28.5455	20.1463	19.2727	14.4851	45.0909	26.1933	10.6667	15.0353
151_o_m_f_a.jpg	a	older	Male	12.1818	10.3133	27.5833	19.4069	35.6667	24.1109	32.5	16.2976	45.2	25.7975	25.5455	17.8009
151_o_m_f_b.jpg	b	older	Male	20.3636	19.7498	26.1818	20.5174	27.6364	19.6177	20.8182	13.9127	28.8182	20.351	21.5833	19.612
161_o_m_f_a.jpg	a	older	Male	12.25	14.0332	23.3333	20.5441	35.4545	27.1233	25.6667	19.532	46.4	20.657	18.6364	19.423
161_o_m_f_b.jpg	b	older	Male	23.1667	21.9082	17.8889	17.2876	17.4545	15.9835	20.8182	14.0201	38.9091	21.8333	16.0833	14.2539
166_o_m_f_a.jpg	a	older	Male	13.0909	16.9201	35.0909	25.7622	32.1818	22.6708	35.4	19.9733	42.2	23.2322	37.3333	24.9339
166_o_m_f_b.jpg	b	older	Male	27.5833	22.4761	11.4444	16.2489	34.4545	18.7423	18.2727	15.2256	40.4545	22.3175	24.25	21.7177
172_o_m_f_a.jpg	a	older	Male	7.83333	16.0784	18	17.5499	29.9091	21.4217	22.7	17.0036	38.1	27.8546	19.6364	14.2427
172_o_m_f_b.jpg	b	older	Male	18.9091	17.7057	19.6364	19.1743	15.9091	14.6113	15.0909	13.7365	29.2	19.1067	11.1667	15.385
176_o_m_f_a.jpg	a	older	Male	12.8333	19.0303	23.5455	17.3284	22.25	17.6847	18.1	17.4576	39.9091	22.3806	15.1818	17.3771
176_o_m_f_b.jpg	b	older	Male	20.0909	20.4032	16.9091	22.2866	18	14.98	18.7273	13.7557	28.1	19.7341	10.4167	12.9296
005_o_f_f_a.jpg	a	older	Female	5.09091	4.72132	22.75	17.3317	32.5833	20.3356	32.8889	15.012	44.3	21.0082	27	16.565
005_o_f_f_b.jpg	b	older	Female	22.3333	19.1089	20.6	20.8817	23.6667	19.0851	24.4	13.5171	32.5455	21.9242	17.75	17.7412
012_o_f_f_a.jpg	a	older	Female	6.5	10.9835	34.8333	16.7323	28.4545	17.1485	33.6	18.0752	41.1818	28.0136	27.1818	14.8109
012_o_f_f_b.jpg	b	older	Female	25.3636	21.2757	28.3636	24.0552	26.2727	15.5826	23	17.2627	31.5455	22.8708	29.9167	22.7255
021_o_f_f_a.jpg	a	older	Female	14.5	18.0126	31.5455	21.3746	35.3636	22.962	34.8	19.9488	42.8182	24.875	40.9	22.1131
021_o_f_f_b.jpg	b	older	Female	19.6364	21.0773	29.5455	22.5227	23.1818	16.0488	22.1818	12.4885	36.0909	22.4609	23.75	19.0984
024_o_f_f_a.jpg	a	older	Female	2.63636	4.8223	18.8182	16.6422	33.1818	28.3331	26.8	17.002	34	29.1967	34.5455	21.2667
024_o_f_f_b.jpg	b	older	Female	14.5	15.5066	10.3	14.9893	15.3333	16.7621	16.8	12.4437	31.1	20.9096	15.6154	15.064
030_o_f_f_a.jpg	a	older	Female	21.75	27.3367	47.2	19.5437	49.8182	14.648	58.1	24.5468	44.7	24.4588	34.5833	28.5544
030_o_f_f_b.jpg	b	older	Female	27.6364	24.8929	33.2	27.6116	45.8	18.7308	29.0909	17.9302	34.5455	23.4579	25.3333	20.3082
036_o_f_f_a.jpg	a	older	Female	9	11.8782	34.8182	23.1336	30.8182	17.1454	32.6	20.4407	35.1	18.7525	26.4545	23.746
036_o_f_f_b.jpg	b	older	Female	28.6364	29.9475	26.4545	25.8316	19.4545	16.4217	16.3333	15.1317	27.1818	20.8222	18.1818	18.5678
044_o_f_f_a.jpg	a	older	Female	5.1	10.8776	16.4545	16.9255	32.9091	21.0687	21.2727	16.2486	40.8889	23.2134	20	20.3634
044_o_f_f_b.jpg	b	older	Female	18.1667	18.2947	15.8889	19.9339	18.2727	13.0391	12.6667	10.1832	32.1818	28.3789	14.0833	16.048
047_o_f_f_a.jpg	a	older	Female	16.6364	24.1051	21	19.9955	23.5455	20.3389	21	13.9642	29	23.6939	20.7273	23.6647
047_o_f_f_b.jpg	b	older	Female	17.0909	20.3934	18.9	21.9618	17.3636	16.5123	21.7	13.7036	26.5	19.89	8.91667	13.1319
055_o_f_f_a.jpg	a	older	Female	11.0833	15.5005	20	16.0278	19.1818	15.2566	24.2	16.7849	39.6	17.5259	20.8333	17.9283
055_o_f_f_b.jpg	b	older	Female	14.7273	17.5219	10.6	16.3381	19.5833	16.3566	16.3	14.2755	30.1	22.0376	14.3333	15.7788
060_o_f_f_a.jpg	a	older	Female	12.3333	16.8055	34.6364	21.6392	36.4545	21.4493	41.4	16.8404	50.3333	26.3676	31.6667	22.2316
060_o_f_f_b.jpg	b	older	Female	31.0833	26.3972	26.6	20.2934	26.9091	17.9246	32.8182	18.4001	39	21.145	26.1667	25.1064
067_o_f_f_a.jpg	a	older	Female	17.0909	18.4686	33.2727	20.6208	37.9167	14.8413	43.1111	20.5879	44.5455	22.9624	27.8	25.1785
067_o_f_f_b.jpg	b	older	Female	27.4167	21.9564	35	25.4471	26.2727	16.8469	22.3636	15.5452	41.9091	17.6944	27.0833	17.6916
075_o_f_f_a.jpg	a	older	Female	16.75	19.6844	33.3	18.6014	32.75	17.7207	29.1	17.2463	41.4545	21.8099	27.7273	22.3342
075_o_f_f_b.jpg	b	older	Female	25.3333	24.3136	31.4444	24.2338	19.9167	15.3946	28.8	18.3109	28.0909	19.5727	25.4167	16.9032
079_o_f_f_a.jpg	a	older	Female	8.41667	13.6079	19.5	16.9518	41.6364	27.5037	28.6667	16.0812	36.7	22.3261	24.6364	16.1014
079_o_f_f_b.jpg	b	older	Female	20	19.8128	24.8	19.1416	26	17.8438	21.2727	17.024	28.1818	18.6001	20.0833	24.9234
086_o_f_f_a.jpg	a	older	Female	11.3077	14.8682	29.8	23.6258	25.6364	15.9516	35.1	14.9625	38.7	28.8215	29.4545	17.6939
086_o_f_f_b.jpg	b	older	Female	18.8333	18.0194	21	19.7484	21	18.2209	17.6	14.8563	21.4167	21.1336	19.4545	17.1135
088_o_f_f_a.jpg	a	older	Female	11.1667	19.7384	31	29.6074	26.8333	29.2787	27.7778	19.2988	34	28.9521	15.6364	14.4933
088_o_f_f_b.jpg	b	older	Female	23.8333	24.598	22.6667	21.7313	13.1818	14.5384	14.4545	12.1767	25.6364	23.9051	8.75	14.6729
096_o_f_f_a.jpg	a	older	Female	8.75	13.6056	38.0909	25.0657	29.8182	18.4489	33.8	19.2227	42.7	28.1071	30	24.5927
096_o_f_f_b.jpg	b	older	Female	29	25.1143	28.9	24.8795	34.8182	19.0411	34.2727	15.5762	32.75	20.2715	27.6364	23.8297
100_o_f_f_a.jpg	a	older	Female	6.66667	10.5083	20.5455	17.4434	19.2	16.6653	27.1818	16.7381	38.5	25.352	19.8182	19.6205
100_o_f_f_b.jpg	b	older	Female	17.4167	14.7245	27.125	19.2535	19.8333	17.8674	22.2727	16.3896	30.1818	21.9946	16.9167	18.2779
110_o_f_f_a.jpg	a	older	Female	6.33333	13.0894	15.9167	16.8763	29.7273	26.3252	25.3636	15.9579	35.4	25.7	18.2727	19.8196
110_o_f_f_b.jpg	b	older	Female	15	15.886	22.1	17.6601	22	19.4113	16.6364	10.8099	29.5455	20.82	14.25	16.4324
112_o_f_f_a.jpg	a	older	Female	7.36364	20.6023	23	22.9521	31.5455	23.918	27.3	18.756	34.4	22.6725	25	21.9727
112_o_f_f_b.jpg	b	older	Female	23.4167	24.5151	29.7	16.9774	22.7273	17.956	20.1818	14.9253	37.1818	22.2343	20.4167	19.4864
120_o_f_f_a.jpg	a	older	Female	12.5455	17.5349	22.6364	21.0013	36	22.9085	27	16.6467	45.3333	27.9732	27.6667	19.1659
120_o_f_f_b.jpg	b	older	Female	18.8182	20.9848	22.6	23.7122	28	19.9549	24.25	26.3236	32.0833	21.0474	20.5455	17.7841
124_o_f_f_a.jpg	a	older	Female	11.0909	18.7	26.75	18.6066	37.5833	23.3723	34.2222	17.3117	40.3	24.3906	23.25	15.3571
124_o_f_f_b.jpg	b	older	Female	24.4167	22.6774	28.9	20.7174	20.4167	16.0367	35	13.6219	31.2222	19.785	14.2308	18.5389
130_o_f_f_a.jpg	a	older	Female	5.5	9.94073	11.3636	12.3067	14.0909	14.9094	17.1	16.1345	36.6	25.1007	16.25	17.3631
130_o_f_f_b.jpg	b	older	Female	12.1667	12.9041	7.9	16.8024	14.4545	14.7402	15.4545	9.27754	20.0909	21.2906	15.3333	19.8005
133_o_f_f_a.jpg	a	older	Female	6.9	13.4532	27.0909	18.1904	29.8182	22.2343	26.8	19.6118	43.0909	28.9981	23.9	19.1686
133_o_f_f_b.jpg	b	older	Female	22.8333	21.161	25.8889	20.2327	23.5	14.2478	17.8	14.3898	27.6364	25.3664	9.54545	7.68588
143_o_f_f_a.jpg	a	older	Female	5.09091	8.2031	36	24.3086	33.7273	18.4287	34.2	15.2082	42.8	26.7573	30.3636	18.0957
143_o_f_f_b.jpg	b	older	Female	17.75	18.316	21.9	21.9669	16.4545	17.2879	24.0909	17.9134	23.5	16.6883	18.25	17.4519
148_o_f_f_a.jpg	a	older	Female	7.91667	11.3334	22.4	12.8686	22.25	12.9694	27.4444	13.8213	39.2	24.814	23.7273	17.269
148_o_f_f_b.jpg	b	older	Female	18.5	17.096	24.6	23.1718	25.5	20.3582	20.2	14.4822	30.1818	23.5534	17.3333	20.0106
154_o_f_f_a.jpg	a	older	Female	6	10.9876	18.0833	17.8858	27.0833	20.6858	19.1	15.5095	38.8	23.9666	17.9091	16.3307
154_o_f_f_b.jpg	b	older	Female	21.5455	23.6447	21.9091	24.8051	20.6364	18.4514	15.7273	12.4747	22.5455	24.1676	16.5455	16.7413
158_o_f_f_a.jpg	a	older	Female	14.4167	20.1154	24.2	17.396	31.0909	21.4357	35	15.3333	36.1	26.7185	23.25	20.4545
158_o_f_f_b.jpg	b	older	Female	18.7	21.5358	29.2727	22.4281	21.9091	20.6855	29.6364	16.9013	31.6364	25.0131	18.5	18.6426
164_o_f_f_a.jpg	a	older	Female	5.41667	8.4149	22.1818	14.414	29.0833	21.8152	24.6667	16.2481	39	24.1195	14.6667	17.0098
164_o_f_f_b.jpg	b	older	Female	19.6364	20.2942	23.0909	18.2617	22.1818	18.3184	22.8182	15.1183	23.5455	20.82	15.8333	16.508
174_o_f_f_a.jpg	a	older	Female	9.75	15.0401	23.4615	20.3782	28.8182	21.8761	29.4	19.0508	44.1	24.0021	20.4167	20.5977
174_o_f_f_b.jpg	b	older	Female	15.1667	16.3698	25.7	18.4875	24.75	19.9323	14.1818	12.8594	26.5	20.2372	19.3636	24.0303

## Sheet: attr_disgusted
Picture	Set	Face Age	Face Gender	Mean_YM_attr	SD_YM_attr	Mean_YF_attr	SD_YF_attr	Mean_MM_attr	SD_MM_attr	Mean_MF_attr	SD_MF_attr	Mean_OM_attr	SD_OM_attr	Mean_OF_attr	SD_OF_attr
008_y_m_d_a.jpg	a	young	Male	19.8182	16.5881	28.6364	21.974	47.4	11.7964	40.0909	18.2014	56.7	19.2414	57.3636	27.1892
008_y_m_d_b.jpg	b	young	Male	25.75	27.0828	30.2222	31.3719	36.9091	14.7611	28.6364	19.5769	45.9167	30.9764	34.9091	20.6517
013_y_m_d_a.jpg	a	young	Male	20.6667	18.1726	35.4	30.613	36.6667	23.0743	36.3333	21.4243	49.2	20.7621	38.6364	20.7763
013_y_m_d_b.jpg	b	young	Male	35.9167	31.3353	21.9	21.0526	43.9091	20.0422	34.0909	20.7964	46.2	18.1034	35	20.3593
016_y_m_d_a.jpg	a	young	Male	24.5455	22.9232	36.75	23.7185	36.1667	18.9777	33.3333	19.5192	44.3	22.1963	32.1818	27.5275
016_y_m_d_b.jpg	b	young	Male	34.0909	30.3495	30.5	25.6049	42.9091	20.1517	33.0909	26.5385	36.5455	22.6467	27.0833	20.246
025_y_m_d_a.jpg	a	young	Male	19	18.8944	20.2727	13.7266	38.2727	22.379	28.1	16.2785	46.5	21.7371	37	28.4029
025_y_m_d_b.jpg	b	young	Male	23.4167	22.7175	20.3333	19.7294	36.2727	21.1948	19.1818	20.4001	41.2727	18.2488	26.25	14.7224
031_y_m_d_a.jpg	a	young	Male	25.75	25.9164	39.1667	23.5752	41.7273	17.8218	49.8	19.674	48.7	25.5476	41.5455	24.0722
031_y_m_d_b.jpg	b	young	Male	32.0833	28.2857	40.4444	23.5165	38.6364	25.7032	24.0909	17.1082	38.3636	25.5314	25.8333	19.5951
037_y_m_d_a.jpg	a	young	Male	8.33333	10.7816	32.1818	24.0367	34.4545	18.4844	32.1	20.9361	45.8889	20.8413	34.3333	25.5105
037_y_m_d_b.jpg	b	young	Male	27.5	25.1739	31.2	23.5599	34.0909	15.2148	27.8182	16.2285	34.2727	21.7949	26.3333	18.042
041_y_m_d_a.jpg	a	young	Male	21.7	23.6081	53.6667	25.0648	55.2727	18.6713	52	28.0753	49.2	27.6196	44.5	29.2279
041_y_m_d_b.jpg	b	young	Male	45.0909	27.8297	42.6364	27.0824	53.4545	19.0492	38.3636	26.1583	57.5455	22.9145	51.5455	28.236
049_y_m_d_a.jpg	a	young	Male	18.3636	18.7418	24.6667	23.8417	38.9091	20.5449	25.2	19.6344	45.8	27.7881	22.1667	17.9232
049_y_m_d_b.jpg	b	young	Male	27.6667	25.4141	25.7	16.4928	47.3	16.5868	21.5	18.0731	32.7273	21.9458	22.5833	23.0433
057_y_m_d_a.jpg	a	young	Male	22.0833	23.4577	45.0909	23.2442	38.1667	22.02	30.8889	19.1013	41.3	19.2991	53.2727	28.2102
057_y_m_d_b.jpg	b	young	Male	29.75	27.6442	31.1111	26.346	39.9167	23.3684	22.3	20.7849	33.4167	23.6699	31.6364	24.549
062_y_m_d_a.jpg	a	young	Male	19.7273	15.8056	37.2727	27.3682	36.2727	16.5233	33.1	17.7854	41.9091	21.1161	32	22.2755
062_y_m_d_b.jpg	b	young	Male	33.8333	23.9501	15.3333	21.0476	35.5455	19.4749	27.1	15.8005	43	18.172	33.9167	21.3986
066_y_m_d_a.jpg	a	young	Male	21.4167	21.9357	37.8182	23.4684	33.8182	23.4044	30.4444	24.4239	43.8182	24.5309	38.3636	27.6885
066_y_m_d_b.jpg	b	young	Male	30.0833	20.8783	23.9	24.5105	41.5455	23.7713	23.5	16.616	48	24.6486	21.0833	18.3474
072_y_m_d_a.jpg	a	young	Male	23.3333	22.2806	42.25	25.0277	42.9091	16.3429	42.3	20.9605	45.3333	20.445	54.75	23.837
072_y_m_d_b.jpg	b	young	Male	38.9167	24.3029	44.3	29.5637	46.4167	18.8219	44	14.476	50.1818	22.9731	37.75	18.6992
081_y_m_d_a.jpg	a	young	Male	11.1667	13.6371	34.4545	24.0348	28.3636	18.8323	17.9	14.0827	34.8	25.2666	25	21.6287
081_y_m_d_b.jpg	b	young	Male	26.9091	21.8699	29.2727	19.0425	41.4545	18.8752	22.0833	17.4432	42.4	19.1149	12	14.0906
089_y_m_d_a.jpg	a	young	Male	28.0769	21.3325	45.8182	27.935	42.75	20.5697	45.1111	28.3877	44.7	22.4304	36.3636	27.8757
089_y_m_d_b.jpg	b	young	Male	32.9091	26.5874	32.4	20.5761	31.2727	23.9002	33.8182	23.8068	33	22.5389	26.2308	14.7713
099_y_m_d_a.jpg	a	young	Male	26	18.8786	28.9167	20.9608	44.5	16.1217	25.1111	15.6959	43.1	22.343	32.0909	23.3
099_y_m_d_b.jpg	b	young	Male	36.8182	23.6043	35.3636	21.5233	45.0909	18.5119	33.9091	20.0422	47.2727	21.2042	26	19.7636
105_y_m_d_a.jpg	a	young	Male	10.5556	9.72254	30.6667	23.9823	38.0909	22.3314	24	15.748	44	24.599	29.5455	25.2601
105_y_m_d_b.jpg	b	young	Male	34	23.7984	21.3333	23.3773	34.75	15.7141	17.6	17.2189	43.7	26.5374	24.5	19.2802
109_y_m_d_a.jpg	a	young	Male	13.9167	15.2343	33.3	23.9585	30.1667	22.4614	32.1111	22.7071	45	26.8701	33.7273	18.7515
109_y_m_d_b.jpg	b	young	Male	30.9167	23.7045	21.8	22.5822	42.25	26.3822	29.2	21.6989	47.7273	18.7941	31.7273	28.3552
114_y_m_d_a.jpg	a	young	Male	13.3333	15.5466	25.7273	21.4946	29.8182	16.7321	31.6	21.1566	42.8	25.5029	31.6364	26.1659
114_y_m_d_b.jpg	b	young	Male	31.25	22.6721	25.7	22.356	36.9231	20.3816	21.4444	20.4457	37.2727	22.258	29.8333	23.1549
119_y_m_d_a.jpg	a	young	Male	21.0833	23.3762	44.2	28.4948	46.1818	23.3102	33.7273	19.9002	34	29.2318	32	28.6356
119_y_m_d_b.jpg	b	young	Male	36.75	26.4064	32.7	25.9403	44.3636	22.949	32.3	17.9818	34.6364	21.974	28.4167	27.1275
123_y_m_d_a.jpg	a	young	Male	25.0909	22.6868	39.7273	23.9169	40.8182	24.0409	32.8	19.3838	50.5	23.7639	35.7273	20.9289
123_y_m_d_b.jpg	b	young	Male	34	22.5993	25.2	26.029	32.5833	16.1778	22.0909	17.3577	46.7273	26.9187	27.5833	18.4266
127_y_m_d_a.jpg	a	young	Male	20.25	17.4675	40.5	32.596	40	18.2592	38	18.2975	47.5455	19.2113	42.8182	27.4511
127_y_m_d_b.jpg	b	young	Male	36.4545	23.5557	43.9091	25.7661	39.1818	21.6001	28.5455	19.9317	40.5833	24.1791	28.4545	23.2953
135_y_m_d_a.jpg	a	young	Male	16.0833	17.1595	25.1818	21.6971	24.8	23.9898	27.7273	19.5043	36.4	18.3436	30.1667	21.1051
135_y_m_d_b.jpg	b	young	Male	21.5	22.9802	20.5	15.2989	27.2727	19.0268	17.6364	25.1924	26.3333	19.9515	23	22.8867
144_y_m_d_a.jpg	a	young	Male	25.9091	25.4616	63.4615	18.0906	36.9	21.9871	44.0909	23.3942	47	23.7403	44.9	30.0017
144_y_m_d_b.jpg	b	young	Male	41.3636	27.2774	54.7	28.6164	45.5833	19.3553	32.8182	20.9801	44.0909	26.0248	33.0909	19.542
147_y_m_d_a.jpg	a	young	Male	21.0909	19.897	45.5	21.669	34.0909	22.594	43.1	21.9669	50.6	20.6462	59.0909	28.9083
147_y_m_d_b.jpg	b	young	Male	42.1818	23.2715	46.8182	23.8278	44.3636	23.2735	39.1	13.86	57.8	21.9383	45.5455	19.9417
153_y_m_d_a.jpg	a	young	Male	21.7273	18.879	35	28.025	33.5	21.509	30.7778	16.991	41.6	22.7411	28.6364	20.7811
153_y_m_d_b.jpg	b	young	Male	33.4167	27.5795	34.7	24.6037	41.8182	24.7096	28.3	20.7528	44.3636	22.8573	22.5	18.4317
160_y_m_d_a.jpg	a	young	Male	9.63636	14.3197	23.5	21.3648	33.4167	27.2979	31.6	23.759	40	22.9444	36.6364	22.8748
160_y_m_d_b.jpg	b	young	Male	30	25.7082	18.9	25.3572	41.7273	20.3474	29.3333	17.9612	41.7273	26.439	35.2727	20.761
167_y_m_d_a.jpg	a	young	Male	15.2	14.6424	26.5	22.8771	38.1667	25.75	23.4	19.5118	37.3636	26.6918	29.5455	22.6952
167_y_m_d_b.jpg	b	young	Male	21.0833	21.1121	26.8889	17.2224	31.6667	18.3617	23.1818	20.1088	41.9091	20.2161	15.7	16.846
170_y_m_d_a.jpg	a	young	Male	17.4545	20.0767	26.0833	20.5447	37	24.682	28.7273	19.9103	39	19.5334	29.7273	20.1449
170_y_m_d_b.jpg	b	young	Male	25.7273	24.8479	44.8182	26.2748	34.0833	21.8942	22.2727	17.4934	46.8	22.8755	29.6667	24.7104
175_y_m_d_a.jpg	a	young	Male	18.5455	19.3099	49.5	24.2806	43.7273	18.1884	35.2	27.9277	46.0909	23.2097	38.9091	30.2042
175_y_m_d_b.jpg	b	young	Male	36	23.4133	40.5556	29.3305	42.7273	19.8045	25.7273	15.9379	46.6364	26.1468	36.25	15.6329
010_y_f_d_a.jpg	a	young	Female	40.1111	31.8726	52.9167	22.6333	53.7273	28.4045	38.9091	22.2461	54.7	24.2901	46.25	25.5169
010_y_f_d_b.jpg	b	young	Female	41.75	27.1063	47.3	30.6922	40	25.593	29.6364	20.9727	41.3636	18.7471	29.0909	19.1492
020_y_f_d_a.jpg	a	young	Female	49.9167	22.5891	52.2	18.7486	46	25.9538	54.1	25.146	59.1818	24.2356	64.3636	30.441
020_y_f_d_b.jpg	b	young	Female	49.0833	24.4595	41.4	28.9029	51.4545	25.8935	27.5455	16.1144	54.2	22.15	39.1667	15.4968
022_y_f_d_a.jpg	a	young	Female	28.7	22.6767	51.4545	22.8358	41.4545	24.0265	40.4	23.2484	52.4	24.4867	43.0909	24.9658
022_y_f_d_b.jpg	b	young	Female	36.5455	25.6295	32.6	23.8989	36.4	29.281	30.4167	21.5848	51.2727	28.3552	31	22.2629
028_y_f_d_a.jpg	a	young	Female	31.9	24.9998	53.5	17.2442	47.3636	22.0557	45.9	18.4237	56.8889	20.0215	42.0833	19.4116
028_y_f_d_b.jpg	b	young	Female	30.5833	23.6814	46.125	24.2041	40.4545	25.6334	27	19.9727	41.0909	16.7419	29.8333	22.0323
034_y_f_d_a.jpg	a	young	Female	10.3333	16.7187	32	23.4189	32.5	23.2164	26.2222	9.76957	46.4	26.2856	32.9167	21.8776
034_y_f_d_b.jpg	b	young	Female	26.2727	24.352	27.3	20.4616	34.8182	30.6849	26.8182	17.6398	45.2	27.3081	21.8333	15.002
040_y_f_d_a.jpg	a	young	Female	55.8182	16.5518	55.8333	19.8028	59.2727	22.738	48.6	21.4072	52.0909	20.4766	44.6364	25.3625
040_y_f_d_b.jpg	b	young	Female	62.0833	24.8393	43.1	24.4197	47.5833	23.228	26.9091	17.6831	49.9091	27.0498	36.8333	21.6662
048_y_f_d_a.jpg	a	young	Female	47.9	30.7009	61.5	25.9563	56.2727	14.9806	54.3	23.4381	51.8889	20.7632	42.75	24.2679
048_y_f_d_b.jpg	b	young	Female	40.9167	21.4368	54.1	31.1036	48.9091	30.9045	32	22.8954	41.4	27.5003	35.7692	25.1567
054_y_f_d_a.jpg	a	young	Female	46.7	31.5843	56.75	22.5998	42.25	19.9687	39.4444	21.8867	52.3636	24.4838	41.7273	19.5555
054_y_f_d_b.jpg	b	young	Female	54.8333	25.3873	44.6	21.6086	45.9091	25.1215	32.0833	19.6629	47.3636	22.6154	27.6667	19.3641
063_y_f_d_a.jpg	a	young	Female	32.1818	21.9582	47.8333	23.4398	49.5455	18.8009	43.3	25.8072	53	22.8716	58.1818	33.1204
063_y_f_d_b.jpg	b	young	Female	32.25	23.2423	42.8	24.321	52.4167	23.739	37.0909	20.0173	55.3333	23.8797	36.9091	21.8241
069_y_f_d_a.jpg	a	young	Female	47.4545	25.789	53.8333	18.4678	44	18.8872	52.1111	27.4383	56.4545	20.4468	37.9091	25.9941
069_y_f_d_b.jpg	b	young	Female	50.5	22.2609	68.9	27.2415	59	24.7207	37.0833	22.5003	48.3636	29.2105	37.9167	18.1582
071_y_f_d_a.jpg	a	young	Female	21.2727	16.9298	48.9091	24.1224	40.5455	27.7646	38.9	21.5223	47.2727	26.3556	35.9	20.5288
071_y_f_d_b.jpg	b	young	Female	31.9167	24.1076	38.8889	26.5728	35.8182	25.6859	19.9091	15.8522	45.8182	23.1509	26.5455	17.6032
085_y_f_d_a.jpg	a	young	Female	26.3333	24.5591	42.1667	26.4191	33.7273	29.7996	35.5	25.2069	41.6364	21.1862	34.9091	25.6182
085_y_f_d_b.jpg	b	young	Female	34.9167	23.0748	25.8889	25.5463	35.75	24.3577	30.2	27.0547	42.7273	25.566	41.8333	27.9051
090_y_f_d_a.jpg	a	young	Female	29	16.1639	42.7273	27.4776	42.3636	27.7931	37.8	26.5238	46.9	24.8973	44.6364	21.782
090_y_f_d_b.jpg	b	young	Female	32	24.3385	30.6667	17.9234	36.0833	26.7461	25.5	16.7614	42.75	20.8201	22	19.6214
098_y_f_d_a.jpg	a	young	Female	29.3636	17.4715	57.6667	22.8606	35.0909	19.0077	49.3	24.2764	47	22.059	37.3	26.6168
098_y_f_d_b.jpg	b	young	Female	46.3333	24.0315	40	30.2903	48.4545	26.9494	41.0909	15.1753	50.5	22.1071	34.9167	20.8521
101_y_f_d_a.jpg	a	young	Female	22.9091	25.3158	49.3636	24.6019	36.5455	20.9445	41.2	20.5686	47.7	23.4334	41.9091	21.1682
101_y_f_d_b.jpg	b	young	Female	35.2727	25.0283	41.9091	31.3766	46.1818	22.2028	32.7273	17.6697	34.0909	21.4031	26.8333	20.8188
106_y_f_d_a.jpg	a	young	Female	51.9091	30.2802	58.2727	23.7154	58.3636	22.1191	51.5	22.6336	55.5	21.4282	52.5	31.7361
106_y_f_d_b.jpg	b	young	Female	63.6364	17.1188	45.4545	32.0199	47.9091	32.3804	40.6364	22.5977	52.7	23.1087	33.25	24.9877
115_y_f_d_a.jpg	a	young	Female	56.0909	27.8045	61.5833	18.0578	52.3636	17.6481	45.3	22.0708	60.0909	13.9388	41.1818	22.9295
115_y_f_d_b.jpg	b	young	Female	56.8333	29.3097	56.3	26.7833	56.6364	26.6131	39.2	17.6119	57.9091	23.3814	35.5	18.0227
125_y_f_d_a.jpg	a	young	Female	11.5	19.7139	31.25	22.2266	28.3333	20.0197	26.3333	16.1632	43.3636	21.9694	32.9	20.2783
125_y_f_d_b.jpg	b	young	Female	25.8182	22.5336	32.6364	24.447	32.9167	26.7733	29.3	24.1479	47.9	23.2592	29.25	21.596
132_y_f_d_a.jpg	a	young	Female	30.2	26.803	48	23.6559	47.5833	22.3015	47.1	20.5072	52.8889	24.441	48.3333	28.5349
132_y_f_d_b.jpg	b	young	Female	40.5833	23.0235	33.5556	33.5601	35.5833	24.9416	25.7273	20.7513	53.8182	24.9793	34.0833	29.0969
134_y_f_d_a.jpg	a	young	Female	36.5	30.0893	45.4545	24.2048	51.25	20.8201	34.1111	11.1405	47.2	26.894	40.75	18.6261
134_y_f_d_b.jpg	b	young	Female	49.0833	29.0688	45.8889	30.8441	48.8333	26.2638	29.8	18.1402	52.4545	25.1808	34.6667	26.6947
140_y_f_d_a.jpg	a	young	Female	34.5455	23.7839	47.25	21.7679	42.8182	23.4684	31.9	18.9	52.7	18.9505	41.8182	29.1747
140_y_f_d_b.jpg	b	young	Female	41.5455	26.5871	46.4545	28.7276	43.6364	29.5204	22	16.6673	42.8182	18.6699	26.3636	20.5974
150_y_f_d_a.jpg	a	young	Female	30.5455	22.536	40.1667	21.3279	41.9167	26.6474	43	20.5487	47.7	18.1049	46.1818	29.5561
150_y_f_d_b.jpg	b	young	Female	37.5833	28.5799	33.3	23.9817	38.7	26.323	27.5833	23.5814	45.5455	21.598	29.7273	19.5913
152_y_f_d_a.jpg	a	young	Female	70.3636	26.5529	63.6667	19.3547	59.7273	26.1461	52.9	20.4692	63.2	14.8009	59.6364	28.3523
152_y_f_d_b.jpg	b	young	Female	57.4167	23.9904	51.8889	28.6856	51.1667	26.2915	45.2	13.2899	48.6364	25.6292	41	25.958
162_y_f_d_a.jpg	a	young	Female	30.7273	25.7957	46	21.6287	51	22.5211	37	20.838	51.6	25.083	40.7273	29.3227
162_y_f_d_b.jpg	b	young	Female	33.9091	24.5823	31.8182	21.5259	36.8333	28.6192	30.2	23.6305	41.2727	24.1747	18.1818	18.9305
163_y_f_d_a.jpg	a	young	Female	42.2727	35.5868	65	22.3681	42.9091	21.083	46.6	25.2683	49.6364	21.4768	29.7273	22.4414
163_y_f_d_b.jpg	b	young	Female	36.5455	23.2395	50.9091	31.1174	44.2	26.4188	24.5	22.0763	40.3	26.862	33.4167	24.53
171_y_f_d_a.jpg	a	young	Female	27	19.6418	54.25	17.1153	47.3333	17.7166	37.4444	18.709	47	26.0085	34.2727	16.1684
171_y_f_d_b.jpg	b	young	Female	38.3636	17.3452	28.3333	20.3347	43.9091	22.3224	31.3636	20.7667	46.1667	20.5198	28.9091	22.5896
173_y_f_d_a.jpg	a	young	Female	23	24.2625	44	21.3158	39.6364	19.1064	41.7	22.7403	51.2727	19.1994	54	25.044
173_y_f_d_b.jpg	b	young	Female	29.6364	23.5893	33.3636	26.4018	37.9091	19.4343	37.6364	25.4255	54.6	20.7857	38.3636	18.4785
177_y_f_d_a.jpg	a	young	Female	25.7273	27.6373	45.9091	25.9671	39.9091	25.6961	39.6	25.5265	44.7	24.0187	46.4545	19.3461
177_y_f_d_b.jpg	b	young	Female	40.3333	30.3325	42.3	33.2668	40	20.0649	35.1	22.9562	36.8	26.4819	33.1538	21.8168
182_y_f_d_a.jpg	a	young	Female	27.5	23.1864	41.1667	23.3699	33.9091	26.6175	37.4	21.4383	38.8889	26.4502	37.9091	26.6925
182_y_f_d_b.jpg	b	young	Female	29.75	27.8245	23.7	24.4179	29.1818	27.8669	19.0909	16.646	37.4167	24.3402	14.0909	16.7419
007_m_m_d_a.jpg	a	middleaged	Male	10.6364	10.7263	19.0909	16.8846	37.6667	24.6441	17.5	14.5086	38.7	19.9669	15.5455	17.3572
007_m_m_d_b.jpg	b	middleaged	Male	18.4167	18.1682	18.1	18.4117	25	17.1348	15.0909	14.321	31.4	19.2192	16.75	17.7566
014_m_m_d_a.jpg	a	middleaged	Male	7.63636	11.4217	18.5385	19.0509	28	24.3844	25.8	17.9369	40	21.5149	25.8333	22.9102
014_m_m_d_b.jpg	b	middleaged	Male	24.0833	20.407	20.7	18.4695	16.1818	11.8981	20.0833	13.7871	30.6667	25.407	12.5455	14.7605
026_m_m_d_a.jpg	a	middleaged	Male	6.72727	6.2943	20	16.6613	18.8333	16.7214	21.5556	17.749	41.3	21.318	29.3333	29.274
026_m_m_d_b.jpg	b	middleaged	Male	18.3333	17.8393	24.1	24.4924	26.25	19.5035	17.2727	15.3303	38	23.3452	21.5	22.0681
032_m_m_d_a.jpg	a	middleaged	Male	7.91667	11.7199	18.1818	21.3439	27.3636	16.925	22.5	15.9809	43.7	24.2398	21.8182	18.4218
032_m_m_d_b.jpg	b	middleaged	Male	19.25	22.2634	20.9	18.3633	26.6364	17.4773	16.8333	13.2927	36.3636	25.061	20.3333	18.3468
038_m_m_d_a.jpg	a	middleaged	Male	16.4	15.6077	30.0833	17.2387	43.2	12.9683	35.1818	16.2838	52.2	19.6118	38.9091	17.7846
038_m_m_d_b.jpg	b	middleaged	Male	26.6364	21.4908	22.0909	20.4424	32.6364	18.4785	28.3636	15.2988	44.2727	21.6707	33.1667	20.2342
045_m_m_d_a.jpg	a	middleaged	Male	12.6667	13.1863	24.2727	15.1069	32.5833	24.2954	23.8889	17.6737	44.1	24.8124	24.8333	18.9057
045_m_m_d_b.jpg	b	middleaged	Male	24.1	19.6041	14.3636	18.7525	21.6923	15.5745	20.5	17.3221	34.6364	21.6577	21.6667	20.3261
051_m_m_d_a.jpg	a	middleaged	Male	17.1818	18.1759	20.8182	17.7021	32.1667	20.4042	26.3	16.7998	41.3	22.5834	25.3636	21.0773
051_m_m_d_b.jpg	b	middleaged	Male	21.5455	22.9232	20.4545	21.8969	29.4	16.514	19.8333	12.8051	42	26.8659	24.6667	21.4617
056_m_m_d_a.jpg	a	middleaged	Male	8.58333	15.2938	18.4	17.1348	29.2727	21.7352	24.9091	17.1374	43.5455	21.1015	23.3636	21.653
056_m_m_d_b.jpg	b	middleaged	Male	20.4545	20.4077	16.9	18.4599	22.0909	19.9723	20.75	16.7719	30.1818	23.6551	23.25	20.4767
058_m_m_d_a.jpg	a	middleaged	Male	14.7273	16.7696	19.4167	16.973	34.8182	25.6508	31.2727	17.8387	43.5	26.8048	35.4167	25.8262
058_m_m_d_b.jpg	b	middleaged	Male	25.4167	19.449	15.3333	19.0591	28.7273	22.1273	21.1667	18.15	40.6364	21.0489	26.4167	19.5423
068_m_m_d_a.jpg	a	middleaged	Male	10.0909	12.4536	16.4545	17.0374	25.9091	27.1973	15.7	12.2297	42.1	23.6194	27.8333	18.115
068_m_m_d_b.jpg	b	middleaged	Male	22.9167	29.9103	12.1111	19.9652	22.8182	15.9362	13.7273	11.4288	28.3333	20.9125	11.4545	14.5421
070_m_m_d_a.jpg	a	middleaged	Male	17.25	17.5091	20.0909	19.1074	35.6364	23.88	26.5455	20.5541	41.9	21.1841	32.0909	16.0403
070_m_m_d_b.jpg	b	middleaged	Male	19	22.0363	16.4444	21.4191	27.1818	18.476	17.4545	13.3069	39.6	16.2631	24.25	14.085
077_m_m_d_a.jpg	a	middleaged	Male	9.36364	14.8881	14.4167	14.0936	15.4	16.2904	16.8333	12.7053	34.8	20.3841	23.0909	20.8732
077_m_m_d_b.jpg	b	middleaged	Male	11.8333	13.9859	20	19.2873	20	15.7422	18.5	15.2625	26.3636	20.9441	16.6667	17.7781
082_m_m_d_a.jpg	a	middleaged	Male	12.1	15.0514	23.2727	17.1061	36.8333	16.8244	17.7	13.3753	38.7	27.6408	26.0909	18.3818
082_m_m_d_b.jpg	b	middleaged	Male	20.8182	23.0817	24.0909	19.6949	24.7273	17.1178	22.7273	18.2926	33.3	21.344	23.0833	20.791
087_m_m_d_a.jpg	a	middleaged	Male	13	17.4642	23.9	20.5126	33.2308	19.2274	26.625	24.2071	46.7	26.7874	34.2727	32.6377
087_m_m_d_b.jpg	b	middleaged	Male	28.1667	22.934	24.9	28.95	32.5455	17.6429	25.5455	19.5416	31.8182	21.8715	24.8333	19.3524
092_m_m_d_a.jpg	a	middleaged	Male	5.41667	6.52907	12.6	15.2912	29.25	27.113	23.8889	17.2006	37.4	26.0265	18.9091	16.3184
092_m_m_d_b.jpg	b	middleaged	Male	20.3636	19.075	16.7	20.0336	23.4167	17.4171	14.3636	11.6814	30.1667	21.8126	18.7273	19.5402
094_m_m_d_a.jpg	a	middleaged	Male	9.25	12.6572	18.8333	22.9023	30.8182	18.1869	24.8	20.2419	41.8	26.5196	32.5	19.143
094_m_m_d_b.jpg	b	middleaged	Male	29.5833	23.3529	22.1	16.7892	34.7273	14.3464	25.2727	21.3873	50.2	20.2419	31.8462	20.5785
104_m_m_d_a.jpg	a	middleaged	Male	10.3636	10.9569	18.75	14.7594	25.1818	18.867	22.3	18.667	35.4	17.6144	16.5	18.9377
104_m_m_d_b.jpg	b	middleaged	Male	20	22.4297	18.1	19.1279	31.9167	20.4293	19.1818	15.4972	34.8	26.8816	17.9167	17.0958
108_m_m_d_a.jpg	a	middleaged	Male	14.0833	15.594	23.0909	16.9201	37.9091	19.7152	27.3	19.3164	41.1	25.2254	20	18.8574
108_m_m_d_b.jpg	b	middleaged	Male	33.4167	25.0616	27.2222	26.3286	25.7273	20.0753	22.1667	17.0978	33.7	23.5846	14.4167	16.5335
116_m_m_d_a.jpg	a	middleaged	Male	13.8182	15.4972	23.9091	22.4431	33.3636	19.9312	20.4545	17.5349	31.1	23.0432	18.4545	17.8906
116_m_m_d_b.jpg	b	middleaged	Male	29.0909	24.9698	23.6364	23.0446	22.5	20.5758	25	23.3966	31.8333	22.0447	22.8182	18.5139
126_m_m_d_a.jpg	a	middleaged	Male	12	15.1217	16.8182	14.5727	32.4167	20.2415	30.7778	17.2466	39.6364	19.7042	20.1	20.7549
126_m_m_d_b.jpg	b	middleaged	Male	23	19.5243	20	22.5776	29	19.4422	17.1818	14.9454	47	21.5819	12	9.77938
136_m_m_d_a.jpg	a	middleaged	Male	8.90909	13.0878	14.1818	19.3485	20.1818	17.7247	23.2	16.0264	33.7	21.6387	19.0909	16.8787
136_m_m_d_b.jpg	b	middleaged	Male	21.2727	17.7206	16.6364	16.354	18	13.0843	15.3636	13.8728	24.9091	20.3738	11.25	14.1172
142_m_m_d_a.jpg	a	middleaged	Male	10.3333	15.8018	23	22.0857	31.3636	21.8507	27.6	17.5068	42.7	23.5705	21.8333	14.1603
142_m_m_d_b.jpg	b	middleaged	Male	33.75	27.1833	26.6667	27.7984	18.4167	15.5765	19.1	16.0309	33.7273	20.1449	20.75	19.0078
149_m_m_d_a.jpg	a	middleaged	Male	18.3846	15.6713	22.7	14.2131	35.0833	27.6453	29.6667	19.2419	47.2727	21.1286	31.7273	20.9384
149_m_m_d_b.jpg	b	middleaged	Male	26.0909	23.1191	25.8182	23.073	34.3636	15.4484	17.7273	12.4907	35.1818	20.2772	21.6364	20.0862
155_m_m_d_a.jpg	a	middleaged	Male	10.8182	10.5149	15.3636	17.3221	35.2727	14.8936	31.3	21.8787	45.7273	20.8235	24.4545	18.4519
155_m_m_d_b.jpg	b	middleaged	Male	21.4545	21.5238	21	22.1224	30.8182	21.5398	17.8182	14.1903	51.4	23.5145	22.9231	20.2133
159_m_m_d_a.jpg	a	middleaged	Male	10.9	13.884	34.25	26.192	34.9167	25.5466	25.8	16.7717	40.6667	25.7245	16.5833	13.9444
159_m_m_d_b.jpg	b	middleaged	Male	20.6667	19.0899	33	23.041	27	21.3401	28.4545	22.3847	33	24.3434	8.08333	14.6316
165_m_m_d_a.jpg	a	middleaged	Male	15.9091	15.3262	33.5	23.6624	41.8182	19.8284	33.2	20.9221	40.4444	25.3925	28	27.5945
165_m_m_d_b.jpg	b	middleaged	Male	18.5833	21.0603	29	24.4177	32.3636	19.6737	25.9091	19.7406	34.2727	21.3733	17.75	18.2115
169_m_m_d_a.jpg	a	middleaged	Male	7.5	10.4316	20.7273	17.1819	29.75	21.9426	16.1111	11.7094	41.5	24.5142	21.0909	23.2442
169_m_m_d_b.jpg	b	middleaged	Male	18.3333	18.3567	21.6	23.119	23	20.3023	16.7273	14.8398	37.2	24.7557	17.3077	18.4634
178_m_m_d_a.jpg	a	middleaged	Male	20.5833	21.7609	27.5455	21.5748	38	15.1987	34.1	18.9587	49.5556	20.409	32.75	22.9629
178_m_m_d_b.jpg	b	middleaged	Male	30.1667	20.6346	30.4	22.446	33.9167	17.3229	37.1	20.5343	43.1818	20.3117	31.9091	22.8143
179_m_m_d_a.jpg	a	middleaged	Male	11.8182	13.7972	25.5	21.1424	38.8182	23.5746	28.2	18.4319	45.3333	27.8568	29.3077	21.3907
179_m_m_d_b.jpg	b	middleaged	Male	25.75	21.659	20.3	20.7313	31.1818	16.0488	28.2727	15.685	40.9	26.4005	20.0769	16.1579
006_m_f_d_a.jpg	a	middleaged	Female	44.2727	26.7697	67.6154	19.8349	50	24.8757	53.9091	27.0424	44.5	21.6808	42.4545	26.6622
006_m_f_d_b.jpg	b	middleaged	Female	47	24.6871	70.5	21.6295	51.8182	35.3774	38	25.3574	44.8	28.5844	37.1538	27.227
011_m_f_d_a.jpg	a	middleaged	Female	18.7	19.1604	37.5	20.0477	40.75	22.6199	35.5556	16.5915	49.3	22.8086	39.5833	21.0085
011_m_f_d_b.jpg	b	middleaged	Female	25.9167	23.8536	32	23.569	34.5	20.6684	24.6	16.7412	34.7273	30.3153	29.4167	22.1214
019_m_f_d_a.jpg	a	middleaged	Female	17.5833	16.528	32.7	26.7293	31.1818	18.0932	26.4	15.9805	38	25.7207	21.4545	19.8008
019_m_f_d_b.jpg	b	middleaged	Female	25.1667	22.3193	29.5	21.7371	29.6667	24.5961	23.7	14.1818	29.4	22.4806	22.8333	20.1938
029_m_f_d_a.jpg	a	middleaged	Female	22.7273	17.664	39.5455	24.3243	29.7273	23.6266	43.6364	17.6594	40.3636	24.2581	28.7273	21.0432
029_m_f_d_b.jpg	b	middleaged	Female	25.6364	20.8436	25.2	18.908	38.3636	27.1303	25.5455	18.7316	31.3333	25.7694	23.1818	18.4489
035_m_f_d_a.jpg	a	middleaged	Female	13	12.3648	21	18.4391	23.4545	16.6875	21.7	17.1468	41	26.579	28.5455	22.5138
035_m_f_d_b.jpg	b	middleaged	Female	16.8333	19.4087	20.4	18.4944	28.0909	20.5692	14.25	11.9934	40.0909	16.688	21	18.0202
043_m_f_d_a.jpg	a	middleaged	Female	8.2	8.5479	28.6667	16.6806	31.3636	19.8357	27	15.0111	42.8	29.1082	31.8333	19.7661
043_m_f_d_b.jpg	b	middleaged	Female	17	21.429	16.5455	19.0072	24.3333	23.2978	15.9	16.6096	40.4	29.2164	18.6923	17.279
050_m_f_d_a.jpg	a	middleaged	Female	11.8182	13.9629	24.2727	17.2979	39.1818	18.5031	32.9091	22.2776	32.5	23.9595	17.75	17.1312
050_m_f_d_b.jpg	b	middleaged	Female	21.7273	23.6351	26	21.0026	39.8182	27.9242	23	18.6011	42.1	34.62	26.3333	25.2814
052_m_f_d_a.jpg	a	middleaged	Female	18.6	17.0893	32.0909	19.9923	43.1818	15.7913	28	19.0438	45.2	25.8147	25.75	18.5135
052_m_f_d_b.jpg	b	middleaged	Female	17.9167	18.9759	24.6	18.3255	32.0909	23.6197	22.3636	18.1839	42.8182	29.9126	21.6667	18.8213
061_m_f_d_a.jpg	a	middleaged	Female	21.3333	17.8292	53.1818	26.1183	49.0909	23.3086	38	23.1996	45.5556	24.2647	43.5833	22.0803
061_m_f_d_b.jpg	b	middleaged	Female	38.3333	23.6541	50.9	29.0763	50	25.93	35.6	18.6917	38.2	26.6742	38.9167	25.4217
064_m_f_d_a.jpg	a	middleaged	Female	14.9091	16.3552	31	19.372	35.1818	17.9545	34.2	20.2364	44.6	28.6519	33.1818	21.4701
064_m_f_d_b.jpg	b	middleaged	Female	26.9167	25.0253	33.5556	25.9139	39.8182	25.0552	25.6364	15.7878	32.1	23.4873	22.3077	19.0586
073_m_f_d_a.jpg	a	middleaged	Female	26.0833	26.5996	40.7273	16.2363	41.25	26.3167	40.9	23.2353	39.1	27.6343	29.4545	22.3131
073_m_f_d_b.jpg	b	middleaged	Female	32.25	23.7032	39.1111	25.9781	42.9	23.3688	22.2727	17.2458	40.5455	17.8122	30.2308	18.6554
080_m_f_d_a.jpg	a	middleaged	Female	25.1	14.224	45.75	23.5994	37.8333	16.0388	37.2222	27.458	44.8889	19.6942	37.9167	23.0235
080_m_f_d_b.jpg	b	middleaged	Female	28.25	21.3249	33	24.8596	32.5833	24.5966	26.6	23.8942	42.6	27.5326	26.7692	22.2978
084_m_f_d_a.jpg	a	middleaged	Female	8.09091	8.21529	33.7273	19.3654	28.3636	14.0019	31.8	21.6374	40.7	20.2542	26.5455	21.2949
084_m_f_d_b.jpg	b	middleaged	Female	26.9091	23.454	28.1818	24.0242	28.3636	15.5324	27.5455	16.8722	28.2727	24.2862	29.3333	17.6189
093_m_f_d_a.jpg	a	middleaged	Female	15	15.3232	27.3846	21.4691	32.7273	25.6675	23.8182	18.1704	43.6	22.9017	32.25	22.5877
093_m_f_d_b.jpg	b	middleaged	Female	19.9091	20.7435	34.8	25.1741	25.6364	26.2879	17.7273	13.6315	33.8182	28.0065	20.6667	21.8146
097_m_f_d_a.jpg	a	middleaged	Female	15.5	17.0534	26.2727	22.1228	30.9091	16.5617	35.7	15.4348	42.3	24.386	28.6364	17.4887
097_m_f_d_b.jpg	b	middleaged	Female	23.5833	23.6469	21.9	15.3728	34.5833	18.4857	19.9091	13.3301	27	22.5167	17.6667	17.4634
103_m_f_d_a.jpg	a	middleaged	Female	24.8333	19.6923	39.2	18.3654	42.9091	23.1925	42.1	18.8941	38.3636	19.0855	31.4545	19.9267
103_m_f_d_b.jpg	b	middleaged	Female	22.1818	24.285	34.2	22.14	39	20.5426	37.9091	28.7766	33.8333	28.142	23	20.3322
111_m_f_d_a.jpg	a	middleaged	Female	30.6	24.7754	38.3333	16.0586	26	18.3897	34.8	20.5416	39.7778	27.5263	38.3333	24.8681
111_m_f_d_b.jpg	b	middleaged	Female	28.4167	19.3224	37.4	26.3236	36.75	25.7333	21.9091	15.4043	30.8	20.7728	35.1667	21.6746
113_m_f_d_a.jpg	a	middleaged	Female	23.8182	22.1035	53.1667	19.0159	31.5455	16.2318	49.7	22.1763	46.7	22.6669	35.8182	30.9122
113_m_f_d_b.jpg	b	middleaged	Female	24.8333	21.6956	34.625	18.8144	32.6364	21.7544	18.2727	13.9362	30.9091	25.1414	27.1667	21.8167
117_m_f_d_a.jpg	a	middleaged	Female	25.1667	16.3975	45.1	21.226	49.4545	22.8839	42.7	27.8211	59.8	23.5315	48.4545	25.6373
117_m_f_d_b.jpg	b	middleaged	Female	34.3333	23.6541	39.4	28.7603	53.5833	21.8193	32.2727	18.0836	53.8182	25.7325	46.5455	24.4351
122_m_f_d_a.jpg	a	middleaged	Female	13.0909	17.6151	36.3636	19.0435	34.8462	22.9813	36.5	24.454	39	29.4958	29.0909	23.1795
122_m_f_d_b.jpg	b	middleaged	Female	17.3636	19.3973	24.1818	21.8487	20.9091	19.5471	19.5455	17.166	30.25	29.1177	24.9091	17.3289
128_m_f_d_a.jpg	a	middleaged	Female	14.8182	14.8984	28.1818	16.247	31.9167	21.8443	32.3	16.0627	45.4	24.7036	28.0909	18.5928
128_m_f_d_b.jpg	b	middleaged	Female	22.1667	21.7834	26.6	28.4808	33.0909	18.8651	17.5833	13.4466	38.6	25.3386	23.9167	18.5397
138_m_f_d_a.jpg	a	middleaged	Female	13.5455	13.5452	35.4167	22.7575	34.9091	25.626	32.3	17.6008	44.2	27.8839	28	19.8494
138_m_f_d_b.jpg	b	middleaged	Female	22.3636	20.0862	24.9	18.9822	37	23.0521	26.7	16.4928	39.1818	22.7368	24.0909	19.5574
139_m_f_d_a.jpg	a	middleaged	Female	15	16.6553	38.9091	21.677	42.4545	26.3187	42.8182	17.509	47.2	22.3696	41.1818	24.6569
139_m_f_d_b.jpg	b	middleaged	Female	19.3636	21.4675	26.7778	22.857	41.0909	28.6198	25	23.4649	43.9	27.8586	28.9231	22.8818
156_m_f_d_a.jpg	a	middleaged	Female	9.91667	12.3027	29.5	14.0292	23.7692	24.3247	26	20.6328	40.3333	22.1824	30.7	18.827
156_m_f_d_b.jpg	b	middleaged	Female	18.1667	18.8286	10.8889	17.0986	25.1818	18.3293	25.2727	20.8091	32	21.9272	19.1538	17.8645
157_m_f_d_a.jpg	a	middleaged	Female	10.9091	15.4755	52.5455	16.5853	37.1818	22.3464	44.7	21.344	52	30.9372	38.4545	21.4353
157_m_f_d_b.jpg	b	middleaged	Female	32.75	27.4131	39.2	28.7704	33.3636	22.0738	32.6364	21.2239	47.8	20.2912	32.8333	21.9579
168_m_f_d_a.jpg	a	middleaged	Female	18.9091	15.649	37.9167	21.7484	42.0909	18.4036	35.6	19.1207	51.5	26.78	44.7273	24.1292
168_m_f_d_b.jpg	b	middleaged	Female	24.5	23.6085	30.2	22.1299	35.9167	19.3224	21.8	16.6853	37	22.0635	18	14.1035
180_m_f_d_a.jpg	a	middleaged	Female	10.3636	11.0478	22.5455	17.1544	24.7273	17.3787	21.1	16.683	36.7	21.4996	20.3636	16.1757
180_m_f_d_b.jpg	b	middleaged	Female	17.6364	16.7706	21.8	19.0543	20.9091	21.5845	18.1818	17.8931	22.8182	18.2801	10.0909	9.76171
004_o_m_d_a.jpg	a	older	Male	12.9091	15.5013	24.9	24.4152	38.4545	18.1514	32	17.2305	40	26.8121	32.9091	30.3462
004_o_m_d_b.jpg	b	older	Male	25.7273	24.3026	27.3636	23.7119	31.8333	19.6646	24.1818	15.6321	49.6667	19.8326	31.6364	25.7731
015_o_m_d_a.jpg	a	older	Male	9.25	12.6931	23.4545	22.6423	29.3636	23.6062	35.2	15.683	39	25.0289	24.8182	20.3018
015_o_m_d_b.jpg	b	older	Male	18.4545	17.8962	32.6	17.9332	30.8182	25.6118	22.7273	16.3162	37.75	24.4433	12	11.6962
018_o_m_d_a.jpg	a	older	Male	7.63636	12.9944	21.3636	19.3508	31.0909	24.1845	26.1	19.2553	43.2727	22.2625	26.3636	16.3968
018_o_m_d_b.jpg	b	older	Male	19.9167	20.5712	23.8889	22.1836	30.2727	29.1516	17.4545	15.1484	33.8	21.2645	13.9231	13.357
027_o_m_d_a.jpg	a	older	Male	14.9231	17.061	24.6	19.6593	31.8182	14.1973	23.7	18.3669	40.4545	25.1729	18.2727	18.7301
027_o_m_d_b.jpg	b	older	Male	24.0833	21.551	26.1	20.5559	25.25	19.9551	18.2	12.6298	43.7	20.7581	20.5833	16.9837
033_o_m_d_a.jpg	a	older	Male	7.27273	7.92579	9.45455	14.18	26.1667	22.3071	24.8889	19.8711	43.6	20.3317	29.5455	19.9968
033_o_m_d_b.jpg	b	older	Male	23.6364	20.3434	22.7	22.0104	24.6667	19.7546	16.3	16.3439	35.5	19.8788	21.2308	21.3313
039_o_m_d_a.jpg	a	older	Male	8.18182	12.5125	22.1667	19.3101	28.5455	22.3399	23.8	20.482	38.6	22.441	22.0909	17.7226
039_o_m_d_b.jpg	b	older	Male	15.6364	16.008	27.0909	21.2718	15.8182	15.2566	21.8333	14.4715	37.2	20.2089	6.25	5.57796
042_o_m_d_a.jpg	a	older	Male	4.63636	6.59201	22.4545	22.536	31.8182	25.3725	20.7	19.5792	36.7	29.462	13.1667	17.0285
042_o_m_d_b.jpg	b	older	Male	15.2727	15.0671	11.7	17.7705	17.5	16.2004	16.2	12.1088	30.1818	21.1982	21.8333	18.5954
046_o_m_d_a.jpg	a	older	Male	7.5	15.8888	15.3636	13.6475	23.6667	26.1997	14.6667	17.5926	38	25.8215	12.4167	13.4533
046_o_m_d_b.jpg	b	older	Male	11.6667	14.9261	12.8	12.0996	11.8333	14.6215	11.7273	12.5546	24.8182	23.5279	5.41667	6.8152
053_o_m_d_a.jpg	a	older	Male	10.9	13.4449	22.3077	15.9759	32	20.0699	22.9	15.4521	39.1	25.022	18.2727	21.0955
053_o_m_d_b.jpg	b	older	Male	21.9167	22.5326	22.1	18.248	25.8333	17.7192	20.8889	12.2111	37	20.3039	19.0769	19.3755
059_o_m_d_a.jpg	a	older	Male	14.8182	16.2408	15.6667	14.8099	36.4545	27.4859	22	17.5442	39.1	23.9418	20.0833	18.4019
059_o_m_d_b.jpg	b	older	Male	13.4167	15.9912	11.8889	17.0253	12.3636	9.72906	10.9091	12.3244	30	21.5973	9.08333	11.1393
065_o_m_d_a.jpg	a	older	Male	11.2727	18.445	19.2727	20.0005	27.9091	20.2013	31.4	21.1828	38.4	24.744	14.75	18.8155
065_o_m_d_b.jpg	b	older	Male	22.6667	20.065	24	24.7162	13.3636	11.5523	14.9091	12.0454	28.4	21.8744	20.8333	20.8581
074_o_m_d_a.jpg	a	older	Male	11.6667	13.0964	17.6364	16.5667	30.0909	31.9013	17.8	14.0063	36.3	21.6438	12.2727	13.6608
074_o_m_d_b.jpg	b	older	Male	14.2727	15.1664	11	17.72	11.6364	12.3472	15.7273	14.9338	23	21.7715	9.36364	8.93614
076_o_m_d_a.jpg	a	older	Male	9.83333	15.5495	16.4167	16.3677	22.8333	26.7848	20	17.371	41.7	25.9103	10.5455	13.7576
076_o_m_d_b.jpg	b	older	Male	13.8182	17.0166	19.2	20.5091	19.3636	17.2004	11.4545	12.8247	29.6	20.0067	16.6154	15.8511
083_o_m_d_a.jpg	a	older	Male	14.9	18.2662	26.1667	22.723	26.6364	17.3452	21	15.6773	41.2	23.0979	22.75	15.3453
083_o_m_d_b.jpg	b	older	Male	21.8333	20.2342	19.4444	21.8467	23.8182	16.4427	20.3333	14.2404	42.6	21.046	19	20.5471
091_o_m_d_a.jpg	a	older	Male	5.09091	9.44939	17.8333	17.4086	24.9091	23.3472	28.8	17.6748	35.7	26.0514	24.0909	18.2727
091_o_m_d_b.jpg	b	older	Male	18.5	21.2196	16.4	19.4205	15	16.1555	18.7273	18.1057	31.2	25.9264	18.7692	20.2655
102_o_m_d_a.jpg	a	older	Male	20	32.0344	24.7273	24.6296	36.7273	25.1081	26.5	20.2937	41.5	33.9059	18.5833	18.6911
102_o_m_d_b.jpg	b	older	Male	28.25	21.8054	19	23.9792	25.0909	18.0081	14.6364	11.8851	30.9	20.8777	6.91667	8.01655
107_o_m_d_a.jpg	a	older	Male	11.75	17.9095	17.1818	19.3071	32.0909	24.5579	27.5	17.4308	37.1	25.7788	11.7273	15.9505
107_o_m_d_b.jpg	b	older	Male	11.25	12.0463	17.5556	20.2677	14	18.2866	13.4545	18.4356	22.9091	20.3099	5.72727	6.4357
118_o_m_d_a.jpg	a	older	Male	14.7	19.5565	20.5	19.143	28.0909	17.0379	22.0909	16.6039	36.6	25.9281	15.3333	17.2223
118_o_m_d_b.jpg	b	older	Male	22.2727	22.1409	21.9091	17.5867	19.1818	15.7023	19.5455	14.2363	32.7	21.8075	15.6923	15.2391
121_o_m_d_a.jpg	a	older	Male	3.88889	6.88194	12.8333	14.9595	24.3333	21.0166	18.1	16.4415	41.3	26.4283	16.9091	17.1316
121_o_m_d_b.jpg	b	older	Male	9.58333	14.016	13.9	16.5962	9	12.5936	12.9091	11.4408	22.3636	20.2053	8.08333	12.2211
131_o_m_d_a.jpg	a	older	Male	13.75	16.3825	19	21.0998	28.6364	21.238	27	15.1789	41.1111	23.0458	21.6667	17.3065
131_o_m_d_b.jpg	b	older	Male	15.25	17.6126	16	18.9091	17.8182	16.2961	13.1667	11.1831	27.5455	24.9334	10.8333	15.6892
137_o_m_d_a.jpg	a	older	Male	9.58333	15.3235	17.4545	14.4455	23.4545	19.0754	26.3	13.3337	35.6	22.302	16.3333	15.7557
137_o_m_d_b.jpg	b	older	Male	19.9167	18.0477	11.4	18.289	22.9167	17.789	13.7273	12.1581	31.75	20.6139	12	13.9571
141_o_m_d_a.jpg	a	older	Male	1.54545	3.77793	12.3636	11.707	25.3333	25.9837	16.7778	17.6407	36.3	25.131	16.0833	15.9115
141_o_m_d_b.jpg	b	older	Male	19.3636	20.2053	13	18.0333	10.3333	7.95822	15	13.8644	25.5833	19.7873	4.09091	5.59383
146_o_m_d_a.jpg	a	older	Male	17.4545	21.5933	17.3333	17.4946	31.5833	23.4383	20	15.6844	36.9	22.5213	24.1818	17.5261
146_o_m_d_b.jpg	b	older	Male	21.1667	19.8395	22.9	18.3088	11.3636	11.6385	15.4545	12.4126	27.9091	23.9435	11.5455	14.8618
151_o_m_d_a.jpg	a	older	Male	9.81818	16.1048	22.6364	23.602	30.8182	23.6085	25.8	17.1257	31.0909	23.9977	16.6	16.2426
151_o_m_d_b.jpg	b	older	Male	19.25	17.8688	14.7	19.1082	18.9091	16.8372	13.9091	11.2557	28	22.1259	21.5385	16.6614
161_o_m_d_a.jpg	a	older	Male	8	9.93982	17.9091	22.2461	25.8182	23.3787	23.2	15.2301	40	24.0125	16.6	17.8898
161_o_m_d_b.jpg	b	older	Male	17.5	18.9041	15.5	18.5068	11.4	10.627	9.66667	7.79666	23.8182	20.6389	8.83333	10.089
166_o_m_d_a.jpg	a	older	Male	14.0909	17.8855	23.6667	29.3485	38.5833	22.072	23.5	20.0125	47	25.9829	27.7273	20.6208
166_o_m_d_b.jpg	b	older	Male	31.25	25.035	17	24.2332	32.3636	18.31	18.5455	14.6994	37.4	30.0969	22.7692	21.0046
172_o_m_d_a.jpg	a	older	Male	1.54545	2.65946	10.1667	13.5836	23	25.7364	23.4444	20.3784	32.2	25.6463	11.0909	14.7136
172_o_m_d_b.jpg	b	older	Male	18	18.2538	20.8	18.6357	13.7273	13.9577	15.7273	15.7549	29	19.8886	11.1667	14.0119
176_o_m_d_a.jpg	a	older	Male	13.8889	24.9472	19.8333	15.8506	35.9167	26.9156	21.8889	21.5606	36.8889	21.0858	15.5	15.3356
176_o_m_d_b.jpg	b	older	Male	23.5833	21.2409	26.5	24.5821	15.1818	17.8707	17.7273	13.6168	26.4	17.8525	11.3333	13.4119
005_o_f_d_a.jpg	a	older	Female	3	5.09902	20.5455	21.5005	24.4545	12.5568	28.5455	8.12851	31.4	22.594	26	14.1351
005_o_f_d_b.jpg	b	older	Female	18.0833	19.4116	20.2	20.4657	16.5	13.1253	16.5	14.4395	26.9091	23.1752	11.6667	17.7934
012_o_f_d_a.jpg	a	older	Female	11.5833	13.6212	27.4545	17.4262	39.6364	19.1952	36.5	21.5213	36.3	27.3254	28.5833	17.3753
012_o_f_d_b.jpg	b	older	Female	25.25	22.7321	32.6	24.6721	23.7273	21.772	18.8182	17.6568	36.6	26.8916	28.8333	24.041
021_o_f_d_a.jpg	a	older	Female	12.1	19.0639	36.0833	21.0647	44.6667	23.3757	36.5	16.8869	43.8	24.257	33.5455	18.8328
021_o_f_d_b.jpg	b	older	Female	19.6364	20.5099	31	21.2864	26.5455	10.8845	29.5455	20.6027	54.3	22.1863	31	22.2016
024_o_f_d_a.jpg	a	older	Female	11.9091	14.3907	19.3636	19.143	27.6364	27.1598	15.5	12.3491	36.1111	28.5545	18.8333	12.0968
024_o_f_d_b.jpg	b	older	Female	19.1667	19.2724	15.5	16.4941	18.25	15.5979	21.2	14.9205	28.6667	24.5332	17.2727	17.024
030_o_f_d_a.jpg	a	older	Female	27	24.8888	50	16.4814	49	23.0375	44.6	24.2588	49.3	25.7037	28.7273	19.9103
030_o_f_d_b.jpg	b	older	Female	27.7273	23.0872	42.7778	27.9499	37.8182	26.0108	22.5455	15.5908	35.6364	20.0263	20.2727	21.2701
036_o_f_d_a.jpg	a	older	Female	6	9.53357	27.6154	18.1362	29.2727	26.5371	28.3	16.8658	35.1111	24.3025	24.4167	19.2328
036_o_f_d_b.jpg	b	older	Female	20.7273	18.4775	30.1818	22.3777	22.1818	16.3574	17.3636	16.9131	26.6	22.5645	19.2727	16.1808
044_o_f_d_a.jpg	a	older	Female	12.9231	17.5901	19.3	19.7712	27.7273	23.5376	25.3	17.4487	36.1	23.9372	24.3636	21.9785
044_o_f_d_b.jpg	b	older	Female	14.6667	13.607	24.4	21.7112	24.5455	24.6185	20.0909	14.307	34	23.2092	21.1667	17.7755
047_o_f_d_a.jpg	a	older	Female	14.7273	23.8037	37	22.099	32	22.6274	27.3	20.0169	39.5	30.012	29.4545	30.5233
047_o_f_d_b.jpg	b	older	Female	22.1667	20.7576	24	20.6034	22.8182	20.449	13.9091	14.3976	26.8182	20.6486	14.1667	15.385
055_o_f_d_a.jpg	a	older	Female	9.18182	11.5136	27.4167	19.119	29.0909	17.1724	27.3636	17.1013	37.1	24.9018	24.6364	18.1178
055_o_f_d_b.jpg	b	older	Female	18.1818	19.0621	23.1	19.4619	19.0909	11.432	14.3636	13.1017	27.1818	22.0944	11.5455	11.1567
060_o_f_d_a.jpg	a	older	Female	14.5455	20.9541	22.75	18.83	32.2727	21.606	25.8	17.2614	37.6	26.6508	20.7273	19.4221
060_o_f_d_b.jpg	b	older	Female	23.3636	18.7844	25.2727	18.7195	20.8182	11.8222	21.25	17.2686	29.8182	20.6195	17.5	15.3948
067_o_f_d_a.jpg	a	older	Female	21.8182	28.0029	41.8182	20.6049	39.4545	23.2352	43.6364	21.4069	43.3333	26.4339	30.5833	22.877
067_o_f_d_b.jpg	b	older	Female	22.8182	22.4313	37.8	22.0998	24.9167	16.7357	21.6	12.9031	37.5	24.9277	26.1667	20.9277
075_o_f_d_a.jpg	a	older	Female	8.90909	13.8308	34.6364	21.4489	22.5455	18.7209	29.9	18.3935	41.5	20.4953	19.3333	18.3963
075_o_f_d_b.jpg	b	older	Female	23.8333	20.0083	37.2222	23.6367	19.1818	15.1711	19.7273	12.8537	23.5	18.7631	16.0769	18.9317
079_o_f_d_a.jpg	a	older	Female	9.09091	11.2912	28.3333	23.0072	32.2727	19.8297	32.3333	19.6723	39.3333	23.0434	22.5	17.957
079_o_f_d_b.jpg	b	older	Female	18.9091	20.8828	32	23.9676	25.5455	20.6124	21.0909	14.5839	26.5455	19.8815	17.5833	18.1532
086_o_f_d_a.jpg	a	older	Female	13.4167	17.7838	27.5455	20.4762	37.9091	18.2508	33.4	18.1732	34.2	23.6493	22.1818	18.6699
086_o_f_d_b.jpg	b	older	Female	22.5	21.2153	24.9	20.867	26.3	15.8749	24	16.0562	24.9091	23.5264	21.75	20.5122
088_o_f_d_a.jpg	a	older	Female	15.5833	25.3967	34	25.5995	21.5455	22.3847	17.5	19.8564	30.5	29.0565	20.5455	29.6829
088_o_f_d_b.jpg	b	older	Female	14.6364	18.9698	25.2	19.4411	15.5833	12.9014	15.2	14.5205	21.7	20.4942	12.5385	15.6078
096_o_f_d_a.jpg	a	older	Female	4.1	4.97661	36.25	24.5621	29.0909	20.7	46.2	23.3324	35.7273	26.5672	19	30.4532
096_o_f_d_b.jpg	b	older	Female	23.1667	25.5123	35.3333	26.7161	28.0833	19.6814	20.2727	19.7641	28.9091	23.8095	22.8182	21.358
100_o_f_d_a.jpg	a	older	Female	4.27273	6.67968	14.25	18.4545	28.7273	25.2551	22.8	18.3715	33.6	29.3833	16	18.4228
100_o_f_d_b.jpg	b	older	Female	13.0833	15.3295	14.7	13.4334	11.5	10.8502	12.7	12.2297	24.1818	17.6342	12.1667	15.6021
110_o_f_d_a.jpg	a	older	Female	9.58333	12.0337	21.6364	19.2368	30	19.8403	24.5556	17.5721	39.8889	20.1087	23.25	18.6602
110_o_f_d_b.jpg	b	older	Female	15.4167	15.6638	33.3333	17.6281	17	16.8345	15.5455	13.5673	30.4167	22.277	9.90909	10.4159
112_o_f_d_a.jpg	a	older	Female	12.1	25.6924	32.8333	25.1499	27.1818	20.049	30.6	21.0196	38.1	22.0477	19.3636	19.1743
112_o_f_d_b.jpg	b	older	Female	23.9167	22.3991	19.6	17.0763	19.6364	16.4212	17.4545	15.155	30.7273	20.0105	12.8333	13.6371
120_o_f_d_a.jpg	a	older	Female	6.18182	9.15225	25	21.2556	30.0909	22.0384	39.1	20.7656	38.3	25.131	21	14.7105
120_o_f_d_b.jpg	b	older	Female	20.1667	18.9489	25.7	22.6669	26.5455	17.386	27.7273	20.6063	31.6364	21.9831	18.6667	17.875
124_o_f_d_a.jpg	a	older	Female	22	29.5573	23.2727	22.3432	38	26.9184	27.5455	22.9711	43.9	23.6053	22.2727	21.555
124_o_f_d_b.jpg	b	older	Female	18.1818	18.8882	23.8182	18.7873	26.6154	17.7883	26.1	18.9411	31.5455	22.5094	10.5455	11.1388
130_o_f_d_a.jpg	a	older	Female	4.18182	7.97268	17.4545	18.6406	23.5	24.1717	20.5556	16.4097	37.2	27.6879	16	19.2146
130_o_f_d_b.jpg	b	older	Female	10.1818	12.3355	17.3636	19.242	14.4545	15.6676	14	15.0756	21.6364	21.1815	12.6364	16.5968
133_o_f_d_a.jpg	a	older	Female	6.25	10.2791	18.3	18.0065	24.3636	30.0242	26.7	14.1032	35.2	25.249	17.3333	15.8535
133_o_f_d_b.jpg	b	older	Female	14.1667	14.609	18.8889	20.521	18.8182	18.1153	14	11.4105	23.5556	22.4004	11.6154	11.4713
143_o_f_d_a.jpg	a	older	Female	11.9167	15.594	33.6364	27.2407	18.2727	15.3824	32.9	17.6097	38.5	21.3086	29.3636	22.752
143_o_f_d_b.jpg	b	older	Female	17	15.9716	23.3	15.521	21.6667	19.2794	30.6	19.8001	31.6364	25.5079	21.1667	20.2477
148_o_f_d_a.jpg	a	older	Female	6	10.6259	22.3636	15.2858	27.9167	15.8886	26.5556	19.5199	35.5455	25.4416	19.3	15.7343
148_o_f_d_b.jpg	b	older	Female	13.4545	14.0525	20.2727	18.2488	14.5455	13.2843	13.2727	14.5196	32.4	21.0724	14.5833	12.9296
154_o_f_d_a.jpg	a	older	Female	4.9	9.43339	24.5385	19.3633	19.2727	18.9267	30.9	18.0336	35.5556	27.6094	14.1667	18.0748
154_o_f_d_b.jpg	b	older	Female	18.1818	19.431	23.6364	22.7652	20.8333	18.6296	20.7	13.2166	23.2	19.5095	16	15.3894
158_o_f_d_a.jpg	a	older	Female	8.36364	11.2718	25.7	17.2823	29.8182	20.2574	39.7	22.1462	34.7	25.1663	23.0833	27.8191
158_o_f_d_b.jpg	b	older	Female	22.0909	24.3494	34.0909	25.2486	22.2727	20.6838	20.4545	11.7759	28.3333	22.52	22.5455	18.1844
164_o_f_d_a.jpg	a	older	Female	7.18182	9.87743	25.5	22.4561	27.1667	16.0954	35.7	20.726	32.8	23.4606	19.4167	17.6762
164_o_f_d_b.jpg	b	older	Female	16.9091	16.9319	18	18.0721	22.7273	16.9829	18.0909	15.1027	23.8	20.8263	8.90909	12.1116
174_o_f_d_a.jpg	a	older	Female	4.58333	6.54298	19.3333	20.4198	23.75	21.41	19.3333	15.9138	48	24.6729	20.4167	16.3621
174_o_f_d_b.jpg	b	older	Female	16.0909	18.9497	22.9091	21.6631	18.25	18.9647	14	11.1535	30	21.3854	20.75	17.945
